# Supplementary material
Source: PubMed Central journal article supplement (PMC3693400)
Supplement: ja208395z_si_002.pdf [file ja208395z_si_002.pdf]

-----  
|  
| Program POWPREF Version MacOSX |  
| Prepares powder histograms for least-squares refinement |  
| Distributed on Wed Apr 21 18:37:06 2010 |  
|-----

-----  
|  
| Allen C. Larson and Robert B. Von Dreele |  
| Manuel Lujan, Jr. Neutron Scattering Center, MS-H805 |  
| Los Alamos National Laboratory, Los Alamos, NM 87545 |  
|  
| Copyright, 2000, The Regents of the University of California. |  
|-----

The last history record is :

HSTRY 83 EXPGUI 1113 1033 (1 changes) -- 06/14/2011 18:25:16  
Data for bank 1 read from file e56881.gsa  
The powder pattern has 4524 channels with 1 bins per channel  
Histogram weight factors are 1.00000 0.00000  
No fixed background points for this powder pattern  
The 2 excluded regions are (in msec):  
Exclude from: to: from: to: from: to: from: to:  
0.0000 2.0000 20.0000 100.0000  
Incident spectrum type 0 can be used in the region 1.000 msec to 20.000 msec  
The minimum possible weighted residual for this histogram is 0.0689  
Histogram no. 1 on file SAFE\_NEUTRON\_FINAL\_STEPHANSS.P01  
updated with new excluded regions, background and incident spectrum data.  
CPU time = 0.01 to update histogram  
Lattice parameters for phase 1 are:  
a,b,c = 5.202475 5.202475 14.014492 angles = 90.000 90.000 120.000  
volume = 328.494  
Lattice parameters for phase 2 are:  
a,b,c = 5.202432 5.202446 14.014503 angles = 90.000 90.000 119.999  
volume = 328.494  
Profile function 3 for phase no. 1 has the coefficients p1-p21:  
0.289766E+00 0.528838E-01 0.746764E-02 0.000000E+00  
0.247120E+02 0.208014E+01 0.000000E+00 0.312672E+01  
0.000000E+00 0.000000E+00 0.000000E+00 0.000000E+00  
0.000000E+00 0.000000E+00 0.000000E+00 0.000000E+00  
0.000000E+00 0.000000E+00 0.000000E+00 0.000000E+00  
0.000000E+00  
cutoff on the wings at 0.001 of maximum

Profile function 3 for phase no. 2 has the coefficients p1-p21:  
0.289766E+00 0.528838E-01 0.746764E-02 0.000000E+00  
0.247120E+02 0.208014E+01 0.000000E+00 0.312672E+01  
0.000000E+00 0.000000E+00 0.000000E+00 0.000000E+00  
0.000000E+00 0.000000E+00 0.000000E+00 0.000000E+00  
0.000000E+00 0.000000E+00 0.000000E+00 0.000000E+00  
0.000000E+00  
cutoff on the wings at 0.001 of maximum

Minimum d-spacing used to generate reflections 0.4215 for phase 1  
Minimum d-spacing used to generate reflections 0.4215 for phase 2  
Minimum d-spacing used to generate reflections 0.9629 for phase 1  
Minimum d-spacing used to generate reflections 0.9629 for phase 2  
Minimum d-spacing for matching reflections 0.4370  
Estimated number of reflections to be generated is 1760  
Minimum d-spacing for magnetic reflections 1.0000  
Est. number of magnetic reflections to be generated is 914  
Number of reflections generated for phase 1 is 514  
Number of reflections generated for phase 2 is 794  
Total number of reflections generated for all phases is 1308  
CPU time = 0.01 sec. to generate reflections.  
CPU time = 0.13 sec. to locate reflection limits.

CPU time = 0.01 sec. to match reflection ranges to powder pattern  
The maximum number of reflections contributing to any profile point is 204  
CPU time = 0.01 sec. to update file  
Data for bank 2 read from file c56881.gsa  
The powder pattern has 3756 channels with 1 bins per channel  
Histogram weight factors are 1.00000 0.00000  
No fixed background points for this powder pattern  
The 2 excluded regions are (in msec):  
Exclude from: to: from: to: from: to: from: to:  
0.0000 2.9980 20.0000 1000.0000  
Incident spectrum type 0 can be used in the region 1.000 msec to 20.000 msec  
The number of zero intensities found in this histogram is 2  
The minimum possible weighted residual for this histogram is 0.0391  
Histogram no. 2 on file SAFE\_NEUTRON\_FINAL\_STEPHANSS.P02  
updated with new excluded regions, background and incident spectrum data.  
CPU time = 0.01 to update histogram  
Profile function 3 for phase no. 1 has the coefficients p1-p21:  
0.410819E+01 0.678940E-01 0.285702E-02 0.354299E+01  
0.439443E+02 -0.185852E+01 0.000000E+00 0.170472E-01  
0.162805E+01 0.000000E+00 0.000000E+00 0.000000E+00  
0.000000E+00 0.000000E+00 0.000000E+00 0.000000E+00  
0.000000E+00 0.000000E+00 0.000000E+00 0.000000E+00

0.000000E+00  
cutoff on the wings at 0.001 of maximum

Profile function 3 for phase no. 2 has the coefficients p1-p21:  
0.410819E+01 0.678940E-01 0.285702E-02 0.354299E+01  
0.439443E+02 -0.185852E+01 0.000000E+00 0.170472E-01  
0.162805E+01 0.000000E+00 0.000000E+00 0.000000E+00  
0.000000E+00 0.000000E+00 0.000000E+00 0.000000E+00  
0.000000E+00 0.000000E+00 0.000000E+00 0.000000E+00

0.000000E+00  
cutoff on the wings at 0.001 of maximum

Minimum d-spacing used to generate reflections 0.4738 for phase 1  
Minimum d-spacing used to generate reflections 0.4738 for phase 2  
Minimum d-spacing used to generate reflections 0.9765 for phase 1  
Minimum d-spacing used to generate reflections 0.9765 for phase 2  
Minimum d-spacing for matching reflections 0.4858  
Estimated number of reflections to be generated is 1515  
Minimum d-spacing for magnetic reflections 1.0000  
Est. number of magnetic reflections to be generated is 878  
Number of reflections generated for phase 1 is 359  
Number of reflections generated for phase 2 is 734  
Total number of reflections generated for all phases is 1093  
CPU time = 0.01 sec. to generate reflections.  
CPU time = 0.08 sec. to locate reflection limits.  
CPU time = 0.01 sec. to match reflection ranges to powder pattern  
The maximum number of reflections contributing to any profile point is 106  
CPU time = 0.00 sec. to update file

Data for bank 3 read from file a56881.gsa  
The powder pattern has 4821 channels with 1 bins per channel  
Histogram weight factors are 1.00000 0.00000  
No fixed background points for this powder pattern  
The 2 excluded regions are (in msec):  
Exclude from: to: from: to: from: to: from: to:  
0.0000 1.5520 20.0000 1000.0000  
Incident spectrum type 0 can be used in the region 0.500 msec to 20.000 msec  
The number of zero intensities found in this histogram is 13  
The minimum possible weighted residual for this histogram is 0.1351  
Histogram no. 3 on file SAFE\_NEUTRON\_FINAL\_STEPHANSS.P03  
updated with new excluded regions, background and incident spectrum data.  
CPU time = 0.01 to update histogram  
Profile function 3 for phase no. 1 has the coefficients p1-p21:  
0.100000E+01 0.527857E-01 0.202603E+00 0.219247E+02  
0.786456E+02 0.128369E+01 0.000000E+00 0.000000E+00  
0.000000E+00 0.000000E+00 0.000000E+00 0.000000E+00  
0.000000E+00 0.000000E+00 0.000000E+00 0.000000E+00  
0.000000E+00 0.000000E+00 0.000000E+00 0.000000E+00

0.000000E+00  
cutoff on the wings at 0.001 of maximum

Profile function 3 for phase no. 2 has the coefficients p1-p21:

```

0.100000E+01  0.527857E-01  0.202603E+00  0.219247E+02
0.786456E+02  0.128369E+01  0.000000E+00  0.000000E+00
0.000000E+00  0.000000E+00  0.000000E+00  0.000000E+00
0.000000E+00  0.000000E+00  0.000000E+00  0.000000E+00
0.000000E+00  0.000000E+00  0.000000E+00  0.000000E+00

```

0.000000E+00  
cutoff on the wings at 0.001 of maximum

```

Minimum d-spacing used to generate reflections  0.7029 for phase 1
Minimum d-spacing used to generate reflections  0.7029 for phase 2
Minimum d-spacing used to generate reflections  0.9742 for phase 1
Minimum d-spacing used to generate reflections  0.9742 for phase 2
Minimum d-spacing for matching reflections  0.7206
Estimated number of reflections to be generated is 1169
Minimum d-spacing for magnetic reflections  1.0000
Est. number of magnetic reflections to be generated is 884
Number of reflections generated for phase 1 is 112
Number of reflections generated for phase 2 is 746
Total number of reflections generated for all phases is 858
CPU time = 0.00 sec. to generate reflections.
CPU time = 0.07 sec. to locate reflection limits.
CPU time = 0.01 sec. to match reflection ranges to powder pattern
The maximum number of reflections contributing to any profile point is 128
CPU time = 0.01 sec. to update file

```

1SF0

Version

Jun 14 18:25:44 2011

Page 1

```

|-----|
|               |
|   Program GENLES Version MacOSX   |
|   General crystal structure refinement program   |
|   Magnetic structure refinement added by M. Yethiraj   |
|   Revised and corrected by Larson and Von Dreele   |
|   Distributed on Wed Apr 21 18:37:09 2010   |
|-----|

```

```

|-----|
|               |
|   Allen C. Larson and Robert B. Von Dreele   |
|   Manuel Lujan, Jr. Neutron Scattering Center, MS-H805   |
|   Los Alamos National Laboratory, Los Alamos, NM 87545   |
|               |
|   Copyright, 2000, The Regents of the University of California.   |
|-----|

```

The experiment file is: SAFE\_NEUTRON\_FINAL\_STEPHANSS.EXP

The last history record is :

HSTRY 84 POWDPREF MacOSX Jun 14 18:25:39 2011

Maximum number of cycles is 99

Marquardt factor for matrix inversion = 3.28

I/SigI cut-off is 1.00

```

Structure factors will be extracted from histogram 1
using extraction method codes  0  0  0  0  0  0  0  0  0
Structure factors will be extracted from histogram 2
using extraction method codes  0  0  0  0  0  0  0  0  0
Structure factors will be extracted from histogram 3
using extraction method codes  0  0  0  0  0  0  0  0  0

```

The atomic and magnetic scattering factors for 3 types of atoms are:

| Atom type    | b-len | a(1)    | b(1)    | a(2)   | b(2)    | a(3)    | b(3)    | a(4)   | b(4)    | c       |        |
|--------------|-------|---------|---------|--------|---------|---------|---------|--------|---------|---------|--------|
| g            |       |         |         |        |         |         |         |        |         |         |        |
| SC+3         | 1.229 | 13.4008 | 0.2985  | 8.0273 | 7.9629  | 1.6594  | -0.2860 | 1.5794 | 16.0662 | -6.6667 |        |
| <j0> Mag. ff | :     | 0.5048  | 31.4040 | 0.5186 | 10.9900 | -0.0241 | 1.1830  | 0.0000 | 0.0000  | 0.0000  |        |
| <j2> Mag. ff | :     | 4.3683  | 28.6540 | 3.7231 | 10.8230 | 0.6074  | 3.6680  | 0.0000 | 0.0000  | 0.0014  |        |
| 2.000        |       |         |         |        |         |         |         |        |         |         |        |
| FE+3         | 0.945 | 11.1764 | 4.6147  | 7.3863 | 0.3005  | 3.3948  | 11.6729 | 0.0724 | 38.5566 | 0.9707  |        |
| <j0> Mag. ff | :     | 0.3972  | 13.2440 | 0.6295 | 4.9030  | -0.0314 | 0.3500  | 0.0000 | 0.0000  | 0.0044  |        |
| <j2> Mag. ff | :     | 1.3602  | 11.9980 | 1.5188 | 5.0030  | 0.4705  | 1.9910  | 0.0000 | 0.0000  | 0.0038  |        |
| 2.000        |       |         |         |        |         |         |         |        |         |         |        |
| O            | 0.580 | 3.0485  | 13.2771 | 2.2868 | 5.7011  | 1.5463  | 0.3239  | 0.8670 | 32.9089 | 0.2508  |        |
| Atom type    |       | CrKa    | FeKa    | CuKa   | MoKa    | AgKa    | TiKa    | CoKa   | TaKa    | WKa     | AuKa   |
| SC+3         | f'    | -0.694  | -0.012  | 0.312  | 0.252   | 0.183   | -5.426  | 0.147  | 0.016   | 0.013   | 0.002  |
|              | f''   | 2.965   | 2.256   | 1.533  | 0.372   | 0.235   | 4.002   | 1.977  | 0.034   | 0.032   | 0.023  |
| FE+3         | f'    | -1.294  | -2.055  | -1.134 | 0.346   | 0.289   | -0.890  | -3.331 | 0.044   | 0.039   | 0.017  |
|              | f''   | 0.762   | 0.565   | 3.197  | 0.844   | 0.545   | 1.052   | 0.490  | 0.084   | 0.079   | 0.058  |
| O            | f'    | 0.093   | 0.072   | 0.049  | 0.011   | 0.006   | 0.121   | 0.063  | -0.002  | -0.003  | -0.003 |



```

FE+3  10 FE10      1  1  0.5400  0 0.0000  0 0.0000  0 0.5477  20 0.4  21
                2.672 22  0.000  0  0.000  0
FE+3  11 FE11      1  1  0.5400  0 0.6667  0 0.3333  0 0.8810  23 0.4  24
                2.672 25  0.000  0  0.000  0
FE+3  12 FE12      1  1  0.5400  0 0.3333  0 0.6667  0 0.2144  26 0.4  27
                2.672 28  0.000  0  0.000  0
Constraints read are LNCN  1 1  1Z  1.0000 1  4Z  1.0000 2  7Z  1.0000 2  8Z  1.0000
                   LNCN  1 2  9Z  1.0000 2 10Z  1.0000 2 11Z  1.0000 2 12Z  1.0000
                   LNCN  2 1 1FRAC -1.0000 1 2FRAC -1.0000 1 4FRAC  1.0000 1 5FRAC  1.0000
Parameter missing - 1 1FRAC
Parameter missing - 1 2FRAC
Parameter missing - 1 4FRAC
Parameter missing - 1 5FRAC
                   LNCN  2 2 1FRAC -1.0000 2 2FRAC -1.0000 2 3FRAC -1.0000 2 4FRAC -1.0000
Parameter missing - 2 1FRAC
Parameter missing - 2 2FRAC
Parameter missing - 2 3FRAC
Parameter missing - 2 4FRAC
                   LNCN  2 2 5FRAC -1.0000 2 6FRAC -1.0000 2 7FRAC  1.0000 2 8FRAC  1.0000
Parameter missing - 2 5FRAC
Parameter missing - 2 6FRAC
Parameter missing - 2 7FRAC
Parameter missing - 2 8FRAC
                   LNCN  2 2 9FRAC  1.0000 2 10FRAC  1.0000 2 11FRAC  1.0000 2 12FRAC  1.0000
Parameter missing - 2 9FRAC
Parameter missing - 2 10FRAC
Parameter missing - 2 11FRAC
Parameter missing - 2 12FRAC
                   LNCN  3 1  2Z  1.0000 1  5Z  1.0000 2  1Z  1.0000 2  2Z  1.0000
Parameter missing - 1  2Z
Parameter missing - 1  5Z
Parameter missing - 2  1Z
Parameter missing - 2  2Z
                   LNCN  3 2  3Z  1.0000 2  4Z  1.0000 2  5Z  1.0000 2  6Z  1.0000
Parameter missing - 2  3Z
Parameter missing - 2  4Z
Parameter missing - 2  5Z
Parameter missing - 2  6Z
                   LNCN  4 1 1UIISO  1.0000 1  4UIISO  1.0000 2  7UIISO  1.0000 2  8UIISO  1.0000
                   LNCN  4 2  9UIISO  1.0000 2 10UIISO  1.0000 2 11UIISO  1.0000 2 12UIISO  1.0000
                   LNCN  5 2  1MX  1.0000 2  2MX  1.0000 2  3MX  1.0000 2 10MX  1.0000
                   LNCN  5 2 11MX  1.0000 2 12MX  1.0000 2  4MX -1.0000 2  5MX -1.0000
                   LNCN  5 2  6MX -1.0000 2  7MX -1.0000 2  8MX -1.0000 2  9MX -1.0000
                   LNCN  6 1  2UIISO  1.0000 1  5UIISO  1.0000 2  1UIISO  1.0000 2  2UIISO  1.0000
                   LNCN  6 2  3UIISO  1.0000 2  4UIISO  1.0000 2  5UIISO  1.0000 2  6UIISO  1.0000
Constraint no. 1 for type RMTN:  1  RM33  1.0000 2  RM33  1.0000
Constraint no. 2 for type RMTN:  1  RM11  1.0000 2  RM11  1.0000 2  RM22  1.0000

```

1SFO

GENLES Version MacOSX Jun 14 18:25:44 2011

Page 4

Lattice parameters for phase 1 are:

```

a      b      c      alpha  beta  gamma
5.202475 5.202475 14.014492 90.0000 90.0000 120.0000

```

These cell parameters will be refined

Reciprocal metric tensor elements:

```

Element :      g11  pn      g22  pn      g33  pn      2*g12  pn      2*g13  pn      2*g23
pn
Value  :  4.92628E-02 29  4.92628E-02 2A  5.09149E-03 2B  4.92628E-02 2C -6.67560E-10 0
-6.67560E-10 0
Constr. :      1.000 2      1.000 2      1.000 2      1.000 2      0.000 0
0.000 0

```

Lattice parameters for phase 2 are:

```

a      b      c      alpha  beta  gamma
5.202432 5.202446 14.014503 90.0000 90.0000 119.9987

```

These cell parameters will be refined

Reciprocal metric tensor elements:

```

Element :      g11  pn      g22  pn      g33  pn      2*g12  pn      2*g13  pn      2*g23
pn
Value  :  4.92623E-02 2D  4.92620E-02 2E  5.09149E-03 2F  4.92602E-02 0 -6.67539E-10 0
-6.67537E-10 0
Constr. :      1.000 2      1.000 2      1.000 2      1.000 0      1.000 0
1.000 0

```

Phase/element fractions for phase no. 1

|           |        |       |   |    |        |       |   |    |        |       |   |    |             |   |   |    |             |   |   |    |
|-----------|--------|-------|---|----|--------|-------|---|----|--------|-------|---|----|-------------|---|---|----|-------------|---|---|----|
| Hist Elm: | PNT    | 1     | 1 | nc | PNT    | 2     | 1 | nc | PNT    | 3     | 1 | nc | PNT*        | 4 | 1 | nc | PXC*        | 5 | 1 | nc |
| Fraction: | 1.0000 |       | 0 |    | 1.0000 |       | 0 |    | 1.0000 |       | 0 |    | not present |   |   |    | not present |   |   |    |
| Dmp/Cnst: | 0      | 0.000 | 0 |    | 0      | 0.000 | 0 |    | 0      | 0.000 | 0 |    |             |   |   |    |             |   |   |    |

Phase/element fractions for phase no. 2

|           |        |       |   |    |        |       |   |    |        |       |   |    |             |   |   |    |             |   |   |    |
|-----------|--------|-------|---|----|--------|-------|---|----|--------|-------|---|----|-------------|---|---|----|-------------|---|---|----|
| Hist Elm: | PNT    | 1     | 1 | nc | PNT    | 2     | 1 | nc | PNT    | 3     | 1 | nc | PNT*        | 4 | 1 | nc | PXC*        | 5 | 1 | nc |
| Fraction: | 1.0000 |       | 0 |    | 1.0000 |       | 0 |    | 1.0000 |       | 0 |    | not present |   |   |    | not present |   |   |    |
| Dmp/Cnst: | 0      | 0.000 | 0 |    | 0      | 0.000 | 0 |    | 0      | 0.000 | 0 |    |             |   |   |    |             |   |   |    |

Histogram scale factors:

|           |        |       |    |        |       |    |        |       |    |        |       |    |        |       |    |
|-----------|--------|-------|----|--------|-------|----|--------|-------|----|--------|-------|----|--------|-------|----|
| Hist/Typ: | 1      | PNT   | pn | 2      | PNT   | pn | 3      | PNT   | pn | 4      | PNT*  | pn | 5      | PXC*  | pn |
| Scale :   | 8.7594 |       | 30 | 8.7618 |       | 31 | 10.066 |       | 32 | 0.0000 |       | 0  | 0.0000 |       | 0  |
| Dmp/Cnst: | 0      | 1.000 | 3  | 0      | 1.000 | 4  | 0      | 1.000 | 5  | 0      | 0.000 | 0  | 0      | 0.000 | 0  |

Absorption coefficients for powder data:

|           |             |       |   |    |             |       |   |    |             |       |   |    |        |       |   |    |        |       |   |    |
|-----------|-------------|-------|---|----|-------------|-------|---|----|-------------|-------|---|----|--------|-------|---|----|--------|-------|---|----|
| Hist/Typ: | 1           | PNT   | 0 | pn | 2           | PNT   | 0 | pn | 3           | PNT   | 0 | pn | 4      | PNT*  | 0 | pn | 5      | PXC*  | 0 | pn |
| Absc 1. : | 0.21758E-01 |       | 0 |    | 0.21758E-01 |       | 0 |    | 0.21758E-01 |       | 0 |    | 0.0000 |       | 0 |    | 0.0000 |       | 0 |    |
| Dmp/Cnst: | 0           | 0.000 | 0 |    | 0           | 0.000 | 0 |    | 0           | 0.000 | 0 |    | 0      | 0.000 | 0 |    | 0      | 0.000 | 0 |    |
| Absc 2. : | 0.0000      |       | 0 |    | 0.0000      |       | 0 |    | 0.0000      |       | 0 |    | 0.0000 |       | 0 |    | 0.0000 |       | 0 |    |
| Dmp/Cnst: | 0           | 0.000 | 0 |    | 0           | 0.000 | 0 |    | 0           | 0.000 | 0 |    | 0      | 0.000 | 0 |    | 0      | 0.000 | 0 |    |

1SF0

GENLES Version MacOSX Jun 14 18:25:44 2011

Page 5

Diffraction constants for powder data:

|          |         |    |       |    |       |    |       |    |      |
|----------|---------|----|-------|----|-------|----|-------|----|------|
| No. Type | Dif C   | pn | Dif A | pn | Zero  | pn | Cnstr | cn | Damp |
| 1 PNT    | 4569.20 | 33 | -0.97 | 35 | 1.900 | 0  | 0.000 | 0  | 0    |
| No. Type | Dif C   | pn | Dif A | pn | Zero  | pn | Cnstr | cn | Damp |
| 2 PNT    | 6162.13 | 0  | -2.51 | 0  | 3.850 | 0  | 0.000 | 0  | 0    |
| No. Type | Dif C   | pn | Dif A | pn | Zero  | pn | Cnstr | cn | Damp |
| 3 PNT    | 2139.59 | 34 | 1.30  | 36 | 9.030 | 0  | 0.000 | 0  | 0    |

Extinction coefficients for phase no. 1:

|           |        |       |    |        |       |    |        |       |    |        |       |    |        |       |    |
|-----------|--------|-------|----|--------|-------|----|--------|-------|----|--------|-------|----|--------|-------|----|
| Hist/Typ: | 1      | PNT   | pn | 2      | PNT   | pn | 3      | PNT   | pn | 4      | PNT*  | pn | 5      | PXC*  | pn |
| Extinct.: | 0.0000 |       | 0  | 0.0000 |       | 0  | 0.0000 |       | 0  | 0.0000 |       | 0  | 0.0000 |       | 0  |
| Dmp/Cnst: | 0      | 0.000 | 0  | 0      | 0.000 | 0  | 0      | 0.000 | 0  | 0      | 0.000 | 0  | 0      | 0.000 | 0  |

Extinction coefficients for phase no. 2:

|           |        |       |    |        |       |    |        |       |    |        |       |    |             |      |    |
|-----------|--------|-------|----|--------|-------|----|--------|-------|----|--------|-------|----|-------------|------|----|
| Hist/Typ: | 1      | PNT   | pn | 2      | PNT   | pn | 3      | PNT   | pn | 4      | PNT*  | pn | 5           | PXC* | pn |
| Extinct.: | 0.0000 |       | 0  | 0.0000 |       | 0  | 0.0000 |       | 0  | 0.0000 |       | 0  | not present |      |    |
| Dmp/Cnst: | 0      | 0.000 | 0  | 0      | 0.000 | 0  | 0      | 0.000 | 0  | 0      | 0.000 | 0  |             |      |    |

Radiation damage coefficients for phase no. 1:

|           |        |       |    |        |       |    |        |       |    |        |       |    |        |       |    |
|-----------|--------|-------|----|--------|-------|----|--------|-------|----|--------|-------|----|--------|-------|----|
| Hist/Typ: | 1      | PNT   | pn | 2      | PNT   | pn | 3      | PNT   | pn | 4      | PNT*  | pn | 5      | PXC*  | pn |
| Rad.dam.: | 0.0000 |       | 0  | 0.0000 |       | 0  | 0.0000 |       | 0  | 0.0000 |       | 0  | 0.0000 |       | 0  |
| Dmp/Cnst: | 0      | 0.000 | 0  | 0      | 0.000 | 0  | 0      | 0.000 | 0  | 0      | 0.000 | 0  | 0      | 0.000 | 0  |

Radiation damage coefficients for phase no. 2:

|           |        |       |    |        |       |    |        |       |    |        |       |    |             |      |    |
|-----------|--------|-------|----|--------|-------|----|--------|-------|----|--------|-------|----|-------------|------|----|
| Hist/Typ: | 1      | PNT   | pn | 2      | PNT   | pn | 3      | PNT   | pn | 4      | PNT*  | pn | 5           | PXC* | pn |
| Rad.dam.: | 0.0000 |       | 0  | 0.0000 |       | 0  | 0.0000 |       | 0  | 0.0000 |       | 0  | not present |      |    |
| Dmp/Cnst: | 0      | 0.000 | 0  | 0      | 0.000 | 0  | 0      | 0.000 | 0  | 0      | 0.000 | 0  |             |      |    |

Preferred orientation coeffs. for phase no. 1 histogram no. 1:

|           |        |       |     |   |
|-----------|--------|-------|-----|---|
| Axis :    | 1      | pn    |     |   |
| Dir./typ: | 0.0    | 0.0   | 1.0 | 0 |
| PO ratio: | 1.0000 | 0     |     |   |
| Dmp/Cnst: | 0      | 0.000 | 0   |   |
| PO frac.: | 1.0000 | 0     |     |   |
| Dmp/Cnst: | 0      | 0.000 | 0   |   |

1SF0

GENLES Version MacOSX Jun 14 18:25:44 2011

Page 6

Preferred orientation coeffs. for phase no. 1 histogram no. 2:

|           |        |       |     |   |
|-----------|--------|-------|-----|---|
| Axis :    | 1      | pn    |     |   |
| Dir./typ: | 0.0    | 0.0   | 1.0 | 0 |
| PO ratio: | 1.0000 | 0     |     |   |
| Dmp/Cnst: | 0      | 0.000 | 0   |   |

PO frac.: 1.0000 0  
Dmp/Cnst: 0 0.000 0

Preferred orientation coeffs. for phase no. 1 histogram no. 3:

Axis : 1 pn  
Dir./typ: 0.0 0.0 1.0 0  
PO ratio: 1.0000 0  
Dmp/Cnst: 0 0.000 0  
PO frac.: 1.0000 0  
Dmp/Cnst: 0 0.000 0

Preferred orientation coeffs. for phase no. 2 histogram no. 1:

Axis : 1 pn  
Dir./typ: 0.0 0.0 1.0 0  
PO ratio: 1.0000 0  
Dmp/Cnst: 0 0.000 0  
PO frac.: 1.0000 0  
Dmp/Cnst: 0 0.000 0

Preferred orientation coeffs. for phase no. 2 histogram no. 2:

Axis : 1 pn  
Dir./typ: 0.0 0.0 1.0 0  
PO ratio: 1.0000 0  
Dmp/Cnst: 0 0.000 0  
PO frac.: 1.0000 0  
Dmp/Cnst: 0 0.000 0

Preferred orientation coeffs. for phase no. 2 histogram no. 3:

Axis : 1 pn  
Dir./typ: 0.0 0.0 1.0 0  
PO ratio: 1.0000 0  
Dmp/Cnst: 0 0.000 0  
PO frac.: 1.0000 0  
Dmp/Cnst: 0 0.000 0

Constraint no. 1 for type PF 5: ALL,1 1.000  
Constraint no. 2 for type PF 5: ALL,2 1.000  
Constraint no. 3 for type PF 5: ALL,3 1.000

Constraint no. 1 for type PF 8: ALL,1 1.000  
Constraint no. 2 for type PF 8: ALL,2 1.000  
Constraint no. 3 for type PF 8: ALL,3 1.000

1SF0

Page 7

GENLES Version MacOSX Jun 14 18:25:44 2011

Profile coeff. for function type 3, phase no. 1 and histogram no. 1; aniso. axis 0. 0. 1.; damp= 0:

Coeff. : alp pn be-0 pn be-1 pn sg-0 pn sg-1 pn sg-2 pn ga-0 pn  
ga-1 pn  
Value : 2.898E-01 0 5.288E-02 0 7.468E-03 0 0.000E+00 0 2.471E+01 37 2.080E+00 0 0.000E+00 0  
3.127E+00 3D  
Constr. : 0.000 0 0.000 0 0.000 0 0.000 0 1.000 10 0.000 0 0.000 0  
1.000 13  
Coeff. : ga-2 pn gsf pn g1ec pn g2ec pn rstr pn rsta pn rsca pn  
L11 pn  
Value : 0.000E+00 0 0.000E+00 0 0.000E+00 0 0.000E+00 0 0.000E+00 0 0.000E+00 0  
0.000E+00 0  
Constr. : 0.000 0 0.000 0 0.000 0 0.000 0 0.000 0 0.000 0 0.000 0  
0.000 0  
Coeff. : L22 pn L33 pn L12 pn L13 pn L23 pn  
Value : 0.000E+00 0 0.000E+00 0 0.000E+00 0 0.000E+00 0 0.000E+00 0  
Constr. : 0.000 0 0.000 0 0.000 0 0.000 0 0.000 0

Profile coeff. for function type 3, phase no. 1 and histogram no. 2; aniso. axis 0. 0. 1.; damp= 0:

Coeff. : alp pn be-0 pn be-1 pn sg-0 pn sg-1 pn sg-2 pn ga-0 pn  
ga-1 pn  
Value : 4.108E+00 0 6.789E-02 0 2.857E-03 0 3.543E+00 0 4.394E+01 38 -1.859E+00 0 0.000E+00 0  
1.705E-02 3E  
Constr. : 0.000 0 0.000 0 0.000 0 0.000 0 1.000 11 0.000 0 0.000 0  
1.000 14  
Coeff. : ga-2 pn gsf pn g1ec pn g2ec pn rstr pn rsta pn rsca pn  
L11 pn  
Value : 1.628E+00 0 0.000E+00 0 0.000E+00 0 0.000E+00 0 0.000E+00 0 0.000E+00 0  
0.000E+00 0  
Constr. : 0.000 0 0.000 0 0.000 0 0.000 0 0.000 0 0.000 0 0.000 0

0.000 0  
Coeff. : L22 pn L33 pn L12 pn L13 pn L23 pn  
Value : 0.000E+00 0 0.000E+00 0 0.000E+00 0 0.000E+00 0 0.000E+00 0  
Constr. : 0.000 0 0.000 0 0.000 0 0.000 0 0.000 0

Profile coeff. for function type 3, phase no. 1 and histogram no. 3; aniso. axis 0. 0. 1.; damp= 0:  
Coeff. : alp pn be-0 pn be-1 pn sg-0 pn sg-1 pn sg-2 pn ga-0 pn  
ga-1 pn  
Value : 1.000E+00 0 5.279E-02 0 2.026E-01 0 2.192E+01 0 7.865E+01 39 1.284E+00 0 0.000E+00 0  
0.000E+00 0  
Constr. : 0.000 0 0.000 0 0.000 0 0.000 0 1.000 12 0.000 0 0.000 0  
0.000 0  
Coeff. : ga-2 pn gsf pn g1ec pn g2ec pn rstr pn rsta pn rsca pn  
L11 pn  
Value : 0.000E+00 0 0.000E+00 0 0.000E+00 0 0.000E+00 0 0.000E+00 0 0.000E+00 0  
0.000E+00 0  
Constr. : 0.000 0 0.000 0 0.000 0 0.000 0 0.000 0 0.000 0 0.000 0  
0.000 0  
Coeff. : L22 pn L33 pn L12 pn L13 pn L23 pn  
Value : 0.000E+00 0 0.000E+00 0 0.000E+00 0 0.000E+00 0  
Constr. : 0.000 0 0.000 0 0.000 0 0.000 0

Profile coeff. for function type 3, phase no. 2 and histogram no. 1; aniso. axis 0. 0. 1.; damp= 0:  
Coeff. : alp pn be-0 pn be-1 pn sg-0 pn sg-1 pn sg-2 pn ga-0 pn  
ga-1 pn  
Value : 2.898E-01 0 5.288E-02 0 7.468E-03 0 0.000E+00 0 2.471E+01 3A 2.080E+00 0 0.000E+00 0  
3.127E+00 3F  
Constr. : 0.000 0 0.000 0 0.000 0 0.000 0 1.000 10 0.000 0 0.000 0  
1.000 13  
Coeff. : ga-2 pn gsf pn g1ec pn g2ec pn rstr pn rsta pn rsca pn  
L11 pn  
Value : 0.000E+00 0 0.000E+00 0 0.000E+00 0 0.000E+00 0 0.000E+00 0 0.000E+00 0  
0.000E+00 0  
Constr. : 0.000 0 0.000 0 0.000 0 0.000 0 0.000 0 0.000 0 0.000 0  
0.000 0  
Coeff. : L22 pn L33 pn L12 pn L13 pn L23 pn  
Value : 0.000E+00 0 0.000E+00 0 0.000E+00 0 0.000E+00 0  
Constr. : 0.000 0 0.000 0 0.000 0 0.000 0

Profile coeff. for function type 3, phase no. 2 and histogram no. 2; aniso. axis 0. 0. 1.; damp= 0:  
Coeff. : alp pn be-0 pn be-1 pn sg-0 pn sg-1 pn sg-2 pn ga-0 pn  
ga-1 pn  
Value : 4.108E+00 0 6.789E-02 0 2.857E-03 0 3.543E+00 0 4.394E+01 3B-1.859E+00 0 0.000E+00 0  
1.705E-02 40  
Constr. : 0.000 0 0.000 0 0.000 0 0.000 0 1.000 11 0.000 0 0.000 0  
1.000 14  
Coeff. : ga-2 pn gsf pn g1ec pn g2ec pn rstr pn rsta pn rsca pn  
L11 pn  
Value : 1.628E+00 0 0.000E+00 0 0.000E+00 0 0.000E+00 0 0.000E+00 0 0.000E+00 0  
0.000E+00 0  
Constr. : 0.000 0 0.000 0 0.000 0 0.000 0 0.000 0 0.000 0 0.000 0  
0.000 0  
Coeff. : L22 pn L33 pn L12 pn L13 pn L23 pn  
Value : 0.000E+00 0 0.000E+00 0 0.000E+00 0 0.000E+00 0  
Constr. : 0.000 0 0.000 0 0.000 0 0.000 0

1SF0

GENLES Version MacOSX Jun 14 18:25:44 2011

Page 8

Profile coeff. for function type 3, phase no. 2 and histogram no. 3; aniso. axis 0. 0. 1.; damp= 0:  
Coeff. : alp pn be-0 pn be-1 pn sg-0 pn sg-1 pn sg-2 pn ga-0 pn  
ga-1 pn  
Value : 1.000E+00 0 5.279E-02 0 2.026E-01 0 2.192E+01 0 7.865E+01 3C 1.284E+00 0 0.000E+00 0  
0.000E+00 0  
Constr. : 0.000 0 0.000 0 0.000 0 0.000 0 1.000 12 0.000 0 0.000 0  
0.000 0  
Coeff. : ga-2 pn gsf pn g1ec pn g2ec pn rstr pn rsta pn rsca pn  
L11 pn  
Value : 0.000E+00 0 0.000E+00 0 0.000E+00 0 0.000E+00 0 0.000E+00 0 0.000E+00 0  
0.000E+00 0  
Constr. : 0.000 0 0.000 0 0.000 0 0.000 0 0.000 0 0.000 0 0.000 0  
0.000 0  
Coeff. : L22 pn L33 pn L12 pn L13 pn L23 pn  
Value : 0.000E+00 0 0.000E+00 0 0.000E+00 0 0.000E+00 0  
Constr. : 0.000 0 0.000 0 0.000 0 0.000 0



Diffuse scattering coefficients for powder data:  
 No diffuse scattering coefficients for histogram 1  
 No diffuse scattering coefficients for histogram 2  
 No diffuse scattering coefficients for histogram 3

Background coefficients for powder data:  
 Histogram no.: 1 Damping factor: 0 Use all points: Y  
 Shifted Chebyshev function of first kind  
 Param. : 1 pn 2 pn 3 pn 4 pn 5 pn 6 pn  
 Coeff. : 0.33101E+00 41-0.16476E-01 43 0.53839E-01 45-0.17364E-01 47-0.89158E-02 49-0.38795E-01 48  
 Param. : 7 pn 8 pn 9 pn  
 Coeff. : -0.17909E-01 4D-0.14925E-01 4F-0.69492E-02 51  
 Histogram no.: 2 Damping factor: 0 Use all points: Y  
 Shifted Chebyshev function of first kind  
 Param. : 1 pn 2 pn 3 pn 4 pn 5 pn 6 pn  
 Coeff. : 0.27396E+00 42-0.97415E-01 44 0.96659E-02 46-0.17507E-01 48 0.11207E-01 4A-0.81016E-02 4C  
 Param. : 7 pn 8 pn 9 pn 10 pn 11 pn 12 pn  
 Coeff. : 0.30981E-03 4E-0.14559E-01 50-0.64751E-02 52 0.24006E-02 53 0.39535E-02 54-0.16723E-01 55  
 Histogram no.: 3 Damping factor: 0 Use all points: Y  
 Shifted Chebyshev function of first kind  
 Param. : 1 pn 2 pn 3 pn 4 pn 5 pn 6 pn  
 Coeff. : 0.29912E+00 0-0.31899E-01 0-0.42900E-02 0-0.15951E-01 0 0.19462E-01 0-0.11893E-01 0  
 Param. : 7 pn 8 pn 9 pn 10 pn  
 Coeff. : -0.25533E-01 0 0.40060E-02 0 0.13208E-01 0-0.14414E-01 0

The constraint matrix has 85 terms

1SF0

GENLES Version MacOSX Jun 14 18:25:44 2011

Page 9

Restraint data statistics:  
 No restraints used

| Powder data statistics |      |       | Fitted      |        | -Bknd  |        | pFree  |        | Average |        |     |          |       |
|------------------------|------|-------|-------------|--------|--------|--------|--------|--------|---------|--------|-----|----------|-------|
|                        | Bank | Ndata | Sum(w*d**2) | wRp    | Rp     | wRp    | Rp     | wRp    | Rp      | Npfree | DWd | Integral |       |
| Hstgm 1                | PNT  | 1     | 4524        | 4595.5 | 0.0694 | 0.1158 | 3.0671 | 0.6237 | 0.0000  | 0.0000 | 0   | 0.658    | 0.982 |
| Hstgm 2                | PNT  | 2     | 3753        | 4939.7 | 0.0449 | 0.0942 | 0.1097 | 0.1130 | 0.0000  | 0.0000 | 0   | 0.462    | 0.990 |
| Hstgm 3                | PNT  | 3     | 4808        | 4302.5 | 0.1278 | 0.1742 | 3.2083 | 0.7146 | 0.0000  | 0.0000 | 0   | 0.733    | 0.997 |
| Powder totals          |      |       | 13085       | 13838. | 0.0614 | 0.1235 | 1.9261 | 0.4498 | 0.0000  | 0.0000 | 0   | 0.611    |       |

No serial correlation in fit at 90% confidence for 1.952 < DWd < 2.048  
 Cycle1155 There were 13085 observations.  
 Total before-cycle CHI\*\*2 (offset/sig) = 1.3838E+04 ( 4.9271E+00)  
 Reduced CHI\*\*2 = 1.061 for 43 variables

Reflection data statistics  
 Histogram 1 Type PNT Nobs = 1302 R(F\*\*2) = 0.1131  
 Histogram 2 Type PNT Nobs = 1071 R(F\*\*2) = 0.0970  
 Histogram 3 Type PNT Nobs = 857 R(F\*\*2) = 0.0802  
 Marquardt factor for this cycle = 3.28  
 After matrix normalization and Marquardt modification:

1 Columns of the 43 Column matrix are 0.0  
 Full matrix recip. condition value & -log10 = 0.1169 0.93  
 Variable NoVarabl was not refined

The value of the determinant is 1.0307\*10.0\*\*( -1)

Atom parameters for phase no. 1

|           | frac        | x       | y                     | z         | 100*Uiso | 100*U11 | 100*U22 | 100*U33 | 100*U12 | 100*U13 |
|-----------|-------------|---------|-----------------------|-----------|----------|---------|---------|---------|---------|---------|
| 100*U23   |             |         |                       |           |          |         |         |         |         |         |
| SC+3 ( 1) | Values      | : 0.460 | 0.000000              | 0.000000  | 0.047687 | 0.378   |         |         |         |         |
|           | Sigmas      | :       |                       |           | 0.000048 | 0.005   |         |         |         |         |
|           | Shft/esd:   | :       |                       |           | -0.01    | -0.01   |         |         |         |         |
| Sc1       | moved 0.00A |         | sum(shift/e.s.d)**2 : | 0.00      |          |         |         |         |         |         |
| FE+3 ( 2) | Values      | : 0.460 | 0.000000              | 0.000000  | 0.257903 | 0.510   |         |         |         |         |
|           | Sigmas      | :       |                       |           | 0.005    |         |         |         |         |         |
|           | Shft/esd:   | :       |                       |           | 0.04     |         |         |         |         |         |
| Fe1       | moved 0.00A |         | sum(shift/e.s.d)**2 : | 0.00      |          |         |         |         |         |         |
| 0 ( 3)    | Values      | : 1.000 | 0.342431              | -0.026015 | 0.817575 | 0.481   |         |         |         |         |
|           | Sigmas      | :       | 0.000153              | 0.000095  | 0.000209 | 0.005   |         |         |         |         |
|           | Shft/esd:   | :       | -0.01                 | -0.03     | 0.00     | 0.03    |         |         |         |         |
| 01        | moved 0.00A |         | sum(shift/e.s.d)**2 : | 0.00      |          |         |         |         |         |         |

FE+3 ( 4) Values : 0.540 0.000000 0.000000 0.047687 0.378  
 Sigmas : 0.000048 0.005  
 Shft/esd: -0.01 -0.01  
 Fe2 moved 0.00A sum(shift/e.s.d)\*\*2 : 0.00

1SF0  
 Page 10

GENLES Version MacOSX Jun 14 18:25:46 2011

SC+3 ( 5) Values : 0.540 0.000000 0.000000 0.257903 0.510  
 Sigmas : 0.005  
 Shft/esd: 0.04  
 Sc2 moved 0.00A sum(shift/e.s.d)\*\*2 : 0.00

Maximum atom shift: 0.00  
 Atomic parameter sum(shift/error)\*\*2 for phase 1 : 0.01  
 Calculated unit cell formula weight: 892.800, density: 4.513gm/cm\*\*3

Atom parameters for phase no. 2

frac x y z 100\*Uiso 100\*U11 100\*U22 100\*U33 100\*U12 100\*U13

100\*U23

Mx My Mz |Moment| Theta Psi  
 FE+3 ( 1) Values : 0.460 0.000000 0.000000 0.257890 0.510  
 Sigmas : 0.005  
 Shft/esd: 0.04

FE+3 ( 1) Moments : 2.672 0.000 0.000 2.672 90.000 0.000  
 Sigmas : 0.042 0.042 0.000 0.000  
 Shft/esd: 0.00

FE1 moved 0.00A sum(shift/e.s.d)\*\*2 : 0.00

FE+3 ( 2) Values : 0.460 0.666670 0.333330 0.591220 0.510  
 Sigmas : 0.005  
 Shft/esd: 0.04

FE+3 ( 2) Moments : 2.672 0.000 0.000 2.672 90.000 0.000  
 Sigmas : 0.042 0.042 0.000 0.000  
 Shft/esd: 0.00

FE2 moved 0.00A sum(shift/e.s.d)\*\*2 : 0.00

FE+3 ( 3) Values : 0.460 0.333330 0.666670 0.924560 0.510  
 Sigmas : 0.005  
 Shft/esd: 0.04

FE+3 ( 3) Moments : 2.672 0.000 0.000 2.672 90.000 0.000  
 Sigmas : 0.042 0.042 0.000 0.000  
 Shft/esd: 0.00

FE3 moved 0.00A sum(shift/e.s.d)\*\*2 : 0.00

FE+3 ( 4) Values : 0.460 0.000000 0.000000 0.757890 0.510  
 Sigmas : 0.005  
 Shft/esd: 0.04

FE+3 ( 4) Moments : -2.672 0.000 0.000 2.672 90.000 180.000  
 Sigmas : 0.042 0.042 0.000 0.000  
 Shft/esd: 0.00

FE4 moved 0.00A sum(shift/e.s.d)\*\*2 : 0.00

1SF0  
 Page 11

GENLES Version MacOSX Jun 14 18:25:46 2011

FE+3 ( 5) Values : 0.460 0.666670 0.333330 0.091220 0.510  
 Sigmas : 0.005  
 Shft/esd: 0.04

FE+3 ( 5) Moments : -2.672 0.000 0.000 2.672 90.000 180.000  
 Sigmas : 0.042 0.042 0.000 0.000  
 Shft/esd: 0.00

FE5 moved 0.00A sum(shift/e.s.d)\*\*2 : 0.00

FE+3 ( 6) Values : 0.460 0.333330 0.666670 0.424560 0.510  
 Sigmas : 0.005  
 Shft/esd: 0.04

FE+3 ( 6) Moments : -2.672 0.000 0.000 2.672 90.000 180.000  
 Sigmas : 0.042 0.042 0.000 0.000  
 Shft/esd: 0.00

```

FE6      moved 0.00A      sum(shift/e.s.d)**2 :    0.00

FE+3 ( 7) Values : 0.540 0.000000 0.000000 0.047687 0.378
          Sigmas :                0.000048 0.005
          Shft/esd:                -0.01 -0.01

FE+3 ( 7) Moments :          -2.672 0.000 0.000 2.672 90.000 180.000
          Sigmas :              0.042                0.042 0.000 0.000
          Shft/esd:              0.00

FE7      moved 0.00A      sum(shift/e.s.d)**2 :    0.00

FE+3 ( 8) Values : 0.540 0.666670 0.333330 0.381017 0.378
          Sigmas :                0.000048 0.005
          Shft/esd:                -0.01 -0.01

FE+3 ( 8) Moments :          -2.672 0.000 0.000 2.672 90.000 180.000
          Sigmas :              0.042                0.042 0.000 0.000
          Shft/esd:              0.00

FE8      moved 0.00A      sum(shift/e.s.d)**2 :    0.00

FE+3 ( 9) Values : 0.540 0.333330 0.666670 0.714358 0.378
          Sigmas :                0.000048 0.005
          Shft/esd:                -0.01 -0.01

FE+3 ( 9) Moments :          -2.672 0.000 0.000 2.672 90.000 180.000
          Sigmas :              0.042                0.042 0.000 0.000
          Shft/esd:              0.00

FE9      moved 0.00A      sum(shift/e.s.d)**2 :    0.00

```

1SF0  
Page 12

GENLES Version MacOSX Jun 14 18:25:46 2011

```

FE+3 (10) Values : 0.540 0.000000 0.000000 0.547688 0.378
          Sigmas :                0.000048 0.005
          Shft/esd:                -0.01 -0.01

FE+3 (10) Moments :          2.672 0.000 0.000 2.672 90.000 0.000
          Sigmas :              0.042                0.042 0.000 0.000
          Shft/esd:              0.00

FE10     moved 0.00A      sum(shift/e.s.d)**2 :    0.00

FE+3 (11) Values : 0.540 0.666670 0.333330 0.881018 0.378
          Sigmas :                0.000048 0.005
          Shft/esd:                -0.01 -0.01

FE+3 (11) Moments :          2.672 0.000 0.000 2.672 90.000 0.000
          Sigmas :              0.042                0.042 0.000 0.000
          Shft/esd:              0.00

FE11     moved 0.00A      sum(shift/e.s.d)**2 :    0.00

FE+3 (12) Values : 0.540 0.333330 0.666670 0.214358 0.378
          Sigmas :                0.000048 0.005
          Shft/esd:                -0.01 -0.01

FE+3 (12) Moments :          2.672 0.000 0.000 2.672 90.000 0.000
          Sigmas :              0.042                0.042 0.000 0.000
          Shft/esd:              0.00

FE12     moved 0.00A      sum(shift/e.s.d)**2 :    0.00

```

Maximum atom shift: 0.00

Atomic parameter sum(shift/error)\*\*2 for phase 2 : 0.01

Calculated unit cell formula weight: 335.082, density: 1.694gm/cm\*\*3

Histogram scale factors:

```

Histogram:  1 PNT      2 PNT      3 PNT      4 PNT*      5 PXC*
Scale   :  8.75995    8.76258    10.0662    0.00000    0.00000
Sigmas  :  0.195795E-01 0.133013E-01 0.343965E-01 0.00000    0.00000
Shft/esd:  0.03      0.06      0.01      0.00      0.00
Histogram scale factor sum(shift/error)**2 : 0.00

```

Lattice parameters for powder data:

Phase 1

```

          a          b          c          alpha          beta          gamma          volume
Value   :  5.202475  5.202475  14.014490  90.000    90.000    120.000    328.494
Sigmas  :  0.000004  0.000004  0.000104  0.000    0.000    0.000    0.003

```



Profile coefficients for histogram no. 1 and for phase no. 2:

| Coeff.     | alp       | be-0      | be-1      | sg-0      | sg-1      | sg-2      | ga-0      | ga-1      | ga-2      |
|------------|-----------|-----------|-----------|-----------|-----------|-----------|-----------|-----------|-----------|
| gsf        |           |           |           |           |           |           |           |           |           |
| Value      | 2.898E-01 | 5.288E-02 | 7.468E-03 | 0.000E+00 | 2.471E+01 | 2.080E+00 | 0.000E+00 | 3.128E+00 | 0.000E+00 |
| Sigmas     |           |           |           |           | 4.847E-01 |           |           | 7.620E-02 |           |
| Shift/esd: |           |           |           |           | -0.01     |           |           | 0.01      |           |
| Coeff.     | g1ec      | g2ec      | rstr      | rsta      | rsca      | L11       | L22       | L33       | L12       |
| L13        |           |           |           |           |           |           |           |           |           |
| Value      | 0.000E+00 |
| Sigmas     |           |           |           |           |           |           |           |           |           |
| Shift/esd: |           |           |           |           |           |           |           |           |           |
| Coeff.     | L23       |           |           |           |           |           |           |           |           |
| Value      | 0.000E+00 |           |           |           |           |           |           |           |           |
| Sigmas     |           |           |           |           |           |           |           |           |           |
| Shift/esd: |           |           |           |           |           |           |           |           |           |

Profile coefficients for histogram no. 2 and for phase no. 2:

| Coeff.     | alp       | be-0      | be-1      | sg-0      | sg-1      | sg-2       | ga-0      | ga-1      | ga-2      |
|------------|-----------|-----------|-----------|-----------|-----------|------------|-----------|-----------|-----------|
| gsf        |           |           |           |           |           |            |           |           |           |
| Value      | 4.108E+00 | 6.789E-02 | 2.857E-03 | 3.543E+00 | 4.394E+01 | -1.859E+00 | 0.000E+00 | 1.798E-02 | 1.628E+00 |
| Sigmas     |           |           |           |           | 3.832E-01 |            |           | 4.968E-02 |           |
| Shift/esd: |           |           |           |           | -0.01     |            |           | 0.02      |           |
| Coeff.     | g1ec      | g2ec      | rstr      | rsta      | rsca      | L11        | L22       | L33       | L12       |
| L13        |           |           |           |           |           |            |           |           |           |
| Value      | 0.000E+00 | 0.000E+00 | 0.000E+00 | 0.000E+00 | 0.000E+00 | 0.000E+00  | 0.000E+00 | 0.000E+00 | 0.000E+00 |
| Sigmas     |           |           |           |           |           |            |           |           |           |
| Shift/esd: |           |           |           |           |           |            |           |           |           |
| Coeff.     | L23       |           |           |           |           |            |           |           |           |
| Value      | 0.000E+00 |           |           |           |           |            |           |           |           |
| Sigmas     |           |           |           |           |           |            |           |           |           |
| Shift/esd: |           |           |           |           |           |            |           |           |           |

Profile coefficients for histogram no. 3 and for phase no. 2:

| Coeff.                              | alp       | be-0      | be-1      | sg-0      | sg-1      | sg-2      | ga-0      | ga-1      | ga-2      |
|-------------------------------------|-----------|-----------|-----------|-----------|-----------|-----------|-----------|-----------|-----------|
| gsf                                 |           |           |           |           |           |           |           |           |           |
| Value                               | 1.000E+00 | 5.279E-02 | 2.026E-01 | 2.192E+01 | 7.865E+01 | 1.284E+00 | 0.000E+00 | 0.000E+00 | 0.000E+00 |
| Sigmas                              |           |           |           |           | 8.318E-01 |           |           |           |           |
| Shift/esd:                          |           |           |           |           | 0.00      |           |           |           |           |
| Coeff.                              | g1ec      | g2ec      | rstr      | rsta      | rsca      | L11       | L22       | L33       | L12       |
| L13                                 |           |           |           |           |           |           |           |           |           |
| Value                               | 0.000E+00 |
| Sigmas                              |           |           |           |           |           |           |           |           |           |
| Shift/esd:                          |           |           |           |           |           |           |           |           |           |
| Coeff.                              | L23       |           |           |           |           |           |           |           |           |
| Value                               | 0.000E+00 |           |           |           |           |           |           |           |           |
| Sigmas                              |           |           |           |           |           |           |           |           |           |
| Shift/esd:                          |           |           |           |           |           |           |           |           |           |
| Profile coef. sum(shift/error)**2 : |           |           |           |           |           |           |           |           | 0.00      |

Background coefficients for histogram no. 1:

| Param.     | 1             | 2             | 3             | 4             | 5             | 6             |
|------------|---------------|---------------|---------------|---------------|---------------|---------------|
| Coeff.     | 3.310211E-01  | -1.648528E-02 | 5.383977E-02  | -1.736754E-02 | -8.912571E-03 | -3.879977E-02 |
| Sigmas     | 6.026234E-04  | 8.385003E-04  | 1.042685E-03  | 8.941636E-04  | 8.445025E-04  | 8.442385E-04  |
| Shift/esd: | 0.01          | -0.01         | 0.00          | 0.00          | 0.00          | -0.01         |
| Param.     | 7             | 8             | 9             |               |               |               |
| Coeff.     | -1.790531E-02 | -1.492775E-02 | -6.956429E-03 |               |               |               |
| Sigmas     | 8.422572E-04  | 8.461432E-04  | 8.279863E-04  |               |               |               |
| Shift/esd: | 0.00          | 0.00          | -0.01         |               |               |               |

Background coefficients for histogram no. 2:

| Param. | 1            | 2             | 3            | 4             | 5            | 6             |
|--------|--------------|---------------|--------------|---------------|--------------|---------------|
| Coeff. | 2.739718E-01 | -9.743177E-02 | 9.673394E-03 | -1.750218E-02 | 1.120425E-02 | -8.098410E-03 |

Sigmas : 3.743019E-04 4.858084E-04 6.158429E-04 5.772837E-04 5.432102E-04 5.315255E-04  
Shift/esd: 0.03 -0.03 0.01 0.01 0.00 0.01  
Param. : 7 8 9 10 11 12  
Coeff. : 3.132125E-04 -1.456232E-02 -6.476350E-03 2.397511E-03 3.950211E-03 -1.672466E-02  
Sigmas : 5.307376E-04 5.276806E-04 5.248352E-04 5.165430E-04 5.124614E-04 5.124906E-04  
Shift/esd: 0.01 -0.01 0.00 -0.01 -0.01 0.00  
Background coef. sum(shift/error)\*\*2 : 0.00

CPU times for matrix build 1.52 sec; matrix inversion 0.01 sec  
Final variable sum((shift/esd)\*\*2) for cycle1155: 0.01 Time: 1.52 sec  
1SF0 GENLES Version MacOSX Jun 14 18:25:46 2011  
Page 16

Restraint data statistics:  
No restraints used

| Powder data statistics |      |       | Fitted        |        | -Bknd  |        | pFree  |        |        | Average |       |          |
|------------------------|------|-------|---------------|--------|--------|--------|--------|--------|--------|---------|-------|----------|
|                        | Bank | Ndata | Sum(w*d**2)   | wRp    | Rp     | wRp    | Rp     | wRp    | Rp     | Npfree  | DWd   | Integral |
| Hstgm                  | 1    | PNT   | 1 4524 4595.4 | 0.0694 | 0.1158 | 3.0672 | 0.6237 | 0.0000 | 0.0000 | 0       | 0.658 | 0.982    |
| Hstgm                  | 2    | PNT   | 2 3753 4939.6 | 0.0449 | 0.0942 | 0.1097 | 0.1131 | 0.0000 | 0.0000 | 0       | 0.462 | 0.990    |
| Hstgm                  | 3    | PNT   | 3 4808 4302.6 | 0.1278 | 0.1742 | 3.2083 | 0.7146 | 0.0000 | 0.0000 | 0       | 0.733 | 0.997    |
| Powder totals          |      |       | 13085 13838.  | 0.0614 | 0.1235 | 1.9262 | 0.4499 | 0.0000 | 0.0000 | 0       | 0.611 |          |

No serial correlation in fit at 90% confidence for 1.952 < DWd < 2.048  
Cycle1156 There were 13085 observations.  
Total before-cycle CHI\*\*2 (offset/sig) = 1.3838E+04 ( 4.9259E+00)  
Reduced CHI\*\*2 = 1.061 for 43 variables

Reflection data statistics  
Histogram 1 Type PNT Nobs = 1302 R(F\*\*2) = 0.1131  
Histogram 2 Type PNT Nobs = 1071 R(F\*\*2) = 0.0970  
Histogram 3 Type PNT Nobs = 857 R(F\*\*2) = 0.0805  
Marquardt factor for this cycle = 3.28  
After matrix normalization and Marquardt modification:

1 Columns of the 43 Column matrix are 0.0  
Full matrix recip. condition value & -log10 = 0.1169 0.93  
Variable NoVarabl was not refined

The value of the determinant is 1.0306\*10.0\*\*( -1)

Atom parameters for phase no. 1

|           | frac        | x     | y        | z         | 100*Uiso              | 100*U11 | 100*U22 | 100*U33 | 100*U12 | 100*U13 |
|-----------|-------------|-------|----------|-----------|-----------------------|---------|---------|---------|---------|---------|
| 100*U23   |             |       |          |           |                       |         |         |         |         |         |
| SC+3 ( 1) | Values :    | 0.460 | 0.000000 | 0.000000  | 0.047686              | 0.378   |         |         |         |         |
|           | Sigmas :    |       |          |           | 0.000048              | 0.005   |         |         |         |         |
|           | Shft/esd:   |       |          |           | 0.00                  | -0.01   |         |         |         |         |
| Sc1       | moved 0.00A |       |          |           | sum(shift/e.s.d)**2 : | 0.00    |         |         |         |         |
| FE+3 ( 2) | Values :    | 0.460 | 0.000000 | 0.000000  | 0.257903              | 0.510   |         |         |         |         |
|           | Sigmas :    |       |          |           |                       | 0.005   |         |         |         |         |
|           | Shft/esd:   |       |          |           |                       | 0.04    |         |         |         |         |
| Fe1       | moved 0.00A |       |          |           | sum(shift/e.s.d)**2 : | 0.00    |         |         |         |         |
| 0 ( 3)    | Values :    | 1.000 | 0.342428 | -0.026017 | 0.817575              | 0.482   |         |         |         |         |
|           | Sigmas :    |       | 0.000153 | 0.000095  | 0.000209              | 0.005   |         |         |         |         |
|           | Shft/esd:   |       | -0.02    | -0.02     | 0.00                  | 0.03    |         |         |         |         |
| 01        | moved 0.00A |       |          |           | sum(shift/e.s.d)**2 : | 0.00    |         |         |         |         |
| FE+3 ( 4) | Values :    | 0.540 | 0.000000 | 0.000000  | 0.047686              | 0.378   |         |         |         |         |
|           | Sigmas :    |       |          |           | 0.000048              | 0.005   |         |         |         |         |
|           | Shft/esd:   |       |          |           | 0.00                  | -0.01   |         |         |         |         |
| Fe2       | moved 0.00A |       |          |           | sum(shift/e.s.d)**2 : | 0.00    |         |         |         |         |

1SF0 GENLES Version MacOSX Jun 14 18:25:47 2011  
Page 17

|           |             |       |          |          |                       |       |  |  |  |  |
|-----------|-------------|-------|----------|----------|-----------------------|-------|--|--|--|--|
| SC+3 ( 5) | Values :    | 0.540 | 0.000000 | 0.000000 | 0.257903              | 0.510 |  |  |  |  |
|           | Sigmas :    |       |          |          |                       | 0.005 |  |  |  |  |
|           | Shft/esd:   |       |          |          |                       | 0.04  |  |  |  |  |
| Sc2       | moved 0.00A |       |          |          | sum(shift/e.s.d)**2 : | 0.00  |  |  |  |  |

Maximum atom shift: 0.00  
Atomic parameter sum(shift/error)\*\*2 for phase 1 : 0.01  
Calculated unit cell formula weight: 892.800, density: 4.513gm/cm\*\*3

Atom parameters for phase no. 2

|           | frac           | x                     | y        | z        | 100*Uiso | 100*U11 | 100*U22 | 100*U33 | 100*U12 | 100*U13 |
|-----------|----------------|-----------------------|----------|----------|----------|---------|---------|---------|---------|---------|
| 100*U23   |                |                       |          |          |          |         |         |         |         |         |
|           |                | Mx                    | My       | Mz       | lMomentl | Theta   | Psi     |         |         |         |
| FE+3 ( 1) | Values : 0.460 | 0.000000              | 0.000000 | 0.257890 | 0.510    |         |         |         |         |         |
|           | Sigmas :       |                       |          |          | 0.005    |         |         |         |         |         |
|           | Shft/esd:      |                       |          |          | 0.04     |         |         |         |         |         |
| FE+3 ( 1) | Moments :      | 2.672                 | 0.000    | 0.000    | 2.672    | 90.000  | 0.000   |         |         |         |
|           | Sigmas :       | 0.042                 |          |          | 0.042    | 0.000   | 0.000   |         |         |         |
|           | Shft/esd:      | 0.00                  |          |          |          |         |         |         |         |         |
| FE1       | moved 0.00A    | sum(shift/e.s.d)**2 : |          | 0.00     |          |         |         |         |         |         |
| FE+3 ( 2) | Values : 0.460 | 0.666670              | 0.333330 | 0.591220 | 0.510    |         |         |         |         |         |
|           | Sigmas :       |                       |          |          | 0.005    |         |         |         |         |         |
|           | Shft/esd:      |                       |          |          | 0.04     |         |         |         |         |         |
| FE+3 ( 2) | Moments :      | 2.672                 | 0.000    | 0.000    | 2.672    | 90.000  | 0.000   |         |         |         |
|           | Sigmas :       | 0.042                 |          |          | 0.042    | 0.000   | 0.000   |         |         |         |
|           | Shft/esd:      | 0.00                  |          |          |          |         |         |         |         |         |
| FE2       | moved 0.00A    | sum(shift/e.s.d)**2 : |          | 0.00     |          |         |         |         |         |         |
| FE+3 ( 3) | Values : 0.460 | 0.333330              | 0.666670 | 0.924560 | 0.510    |         |         |         |         |         |
|           | Sigmas :       |                       |          |          | 0.005    |         |         |         |         |         |
|           | Shft/esd:      |                       |          |          | 0.04     |         |         |         |         |         |
| FE+3 ( 3) | Moments :      | 2.672                 | 0.000    | 0.000    | 2.672    | 90.000  | 0.000   |         |         |         |
|           | Sigmas :       | 0.042                 |          |          | 0.042    | 0.000   | 0.000   |         |         |         |
|           | Shft/esd:      | 0.00                  |          |          |          |         |         |         |         |         |
| FE3       | moved 0.00A    | sum(shift/e.s.d)**2 : |          | 0.00     |          |         |         |         |         |         |
| FE+3 ( 4) | Values : 0.460 | 0.000000              | 0.000000 | 0.757890 | 0.510    |         |         |         |         |         |
|           | Sigmas :       |                       |          |          | 0.005    |         |         |         |         |         |
|           | Shft/esd:      |                       |          |          | 0.04     |         |         |         |         |         |
| FE+3 ( 4) | Moments :      | -2.672                | 0.000    | 0.000    | 2.672    | 90.000  | 180.000 |         |         |         |
|           | Sigmas :       | 0.042                 |          |          | 0.042    | 0.000   | 0.000   |         |         |         |
|           | Shft/esd:      | 0.00                  |          |          |          |         |         |         |         |         |
| FE4       | moved 0.00A    | sum(shift/e.s.d)**2 : |          | 0.00     |          |         |         |         |         |         |
| 1SF0      |                |                       |          |          |          |         |         |         |         |         |
| Page 18   |                |                       |          |          |          |         |         |         |         |         |
|           |                |                       |          |          |          |         |         |         |         |         |
| FE+3 ( 5) | Values : 0.460 | 0.666670              | 0.333330 | 0.091220 | 0.510    |         |         |         |         |         |
|           | Sigmas :       |                       |          |          | 0.005    |         |         |         |         |         |
|           | Shft/esd:      |                       |          |          | 0.04     |         |         |         |         |         |
| FE+3 ( 5) | Moments :      | -2.672                | 0.000    | 0.000    | 2.672    | 90.000  | 180.000 |         |         |         |
|           | Sigmas :       | 0.042                 |          |          | 0.042    | 0.000   | 0.000   |         |         |         |
|           | Shft/esd:      | 0.00                  |          |          |          |         |         |         |         |         |
| FE5       | moved 0.00A    | sum(shift/e.s.d)**2 : |          | 0.00     |          |         |         |         |         |         |
| FE+3 ( 6) | Values : 0.460 | 0.333330              | 0.666670 | 0.424560 | 0.510    |         |         |         |         |         |
|           | Sigmas :       |                       |          |          | 0.005    |         |         |         |         |         |
|           | Shft/esd:      |                       |          |          | 0.04     |         |         |         |         |         |
| FE+3 ( 6) | Moments :      | -2.672                | 0.000    | 0.000    | 2.672    | 90.000  | 180.000 |         |         |         |
|           | Sigmas :       | 0.042                 |          |          | 0.042    | 0.000   | 0.000   |         |         |         |
|           | Shft/esd:      | 0.00                  |          |          |          |         |         |         |         |         |
| FE6       | moved 0.00A    | sum(shift/e.s.d)**2 : |          | 0.00     |          |         |         |         |         |         |
| FE+3 ( 7) | Values : 0.540 | 0.000000              | 0.000000 | 0.047686 | 0.378    |         |         |         |         |         |
|           | Sigmas :       |                       |          | 0.000048 | 0.005    |         |         |         |         |         |
|           | Shft/esd:      |                       |          | 0.00     | -0.01    |         |         |         |         |         |
| FE+3 ( 7) | Moments :      | -2.672                | 0.000    | 0.000    | 2.672    | 90.000  | 180.000 |         |         |         |
|           | Sigmas :       | 0.042                 |          |          | 0.042    | 0.000   | 0.000   |         |         |         |
|           | Shft/esd:      | 0.00                  |          |          |          |         |         |         |         |         |
| FE7       | moved 0.00A    | sum(shift/e.s.d)**2 : |          | 0.00     |          |         |         |         |         |         |
| FE+3 ( 8) | Values : 0.540 | 0.666670              | 0.333330 | 0.381016 | 0.378    |         |         |         |         |         |
|           | Sigmas :       |                       |          | 0.000048 | 0.005    |         |         |         |         |         |
|           | Shft/esd:      |                       |          | 0.00     | -0.01    |         |         |         |         |         |
| FE+3 ( 8) | Moments :      | -2.672                | 0.000    | 0.000    | 2.672    | 90.000  | 180.000 |         |         |         |

Sigmas : 0.042 0.042 0.000 0.000  
 Shft/esd: 0.00  
 FE8 moved 0.00A sum(shift/e.s.d)\*\*2 : 0.00  
 FE+3 ( 9) Values : 0.540 0.333330 0.666670 0.714357 0.378  
 Sigmas : 0.000048 0.005  
 Shft/esd: 0.00 -0.01  
 FE+3 ( 9) Moments : -2.672 0.000 0.000 2.672 90.000 180.000  
 Sigmas : 0.042 0.042 0.000 0.000  
 Shft/esd: 0.00  
 FE9 moved 0.00A sum(shift/e.s.d)\*\*2 : 0.00

1SF0  
Page 19

GENLES Version MacOSX Jun 14 18:25:47 2011

FE+3 ( 10) Values : 0.540 0.000000 0.000000 0.547687 0.378  
 Sigmas : 0.000048 0.005  
 Shft/esd: 0.00 -0.01  
 FE+3 ( 10) Moments : 2.672 0.000 0.000 2.672 90.000 0.000  
 Sigmas : 0.042 0.042 0.000 0.000  
 Shft/esd: 0.00  
 FE10 moved 0.00A sum(shift/e.s.d)\*\*2 : 0.00  
 FE+3 ( 11) Values : 0.540 0.666670 0.333330 0.881017 0.378  
 Sigmas : 0.000048 0.005  
 Shft/esd: 0.00 -0.01  
 FE+3 ( 11) Moments : 2.672 0.000 0.000 2.672 90.000 0.000  
 Sigmas : 0.042 0.042 0.000 0.000  
 Shft/esd: 0.00  
 FE11 moved 0.00A sum(shift/e.s.d)\*\*2 : 0.00  
 FE+3 ( 12) Values : 0.540 0.333330 0.666670 0.214357 0.378  
 Sigmas : 0.000048 0.005  
 Shft/esd: 0.00 -0.01  
 FE+3 ( 12) Moments : 2.672 0.000 0.000 2.672 90.000 0.000  
 Sigmas : 0.042 0.042 0.000 0.000  
 Shft/esd: 0.00  
 FE12 moved 0.00A sum(shift/e.s.d)\*\*2 : 0.00

Maximum atom shift: 0.00  
 Atomic parameter sum(shift/error)\*\*2 for phase 2 : 0.01  
 Calculated unit cell formula weight: 335.082, density: 1.694gm/cm\*\*3

Histogram scale factors:

| Histogram:                                   | 1 PNT        | 2 PNT        | 3 PNT        | 4 PNT*  | 5 PXC*  |
|----------------------------------------------|--------------|--------------|--------------|---------|---------|
| Scale :                                      | 8.76047      | 8.76324      | 10.0664      | 0.00000 | 0.00000 |
| Sigmas :                                     | 0.195805E-01 | 0.133022E-01 | 0.343969E-01 | 0.00000 | 0.00000 |
| Shift/esd:                                   | 0.03         | 0.05         | 0.01         | 0.00    | 0.00    |
| Histogram scale factor sum(shift/error)**2 : | 0.00         |              |              |         |         |

Lattice parameters for powder data:

Phase 1

|          | a        | b        | c         | alpha  | beta   | gamma   | volume  |
|----------|----------|----------|-----------|--------|--------|---------|---------|
| Value :  | 5.202475 | 5.202475 | 14.014489 | 90.000 | 90.000 | 120.000 | 328.494 |
| Sigmas : | 0.000004 | 0.000004 | 0.000104  | 0.000  | 0.000  | 0.000   | 0.003   |

Reciprocal metric tensor shift factor = 100%

Phase 2

|          | a        | b        | c         | alpha  | beta   | gamma   | volume  |
|----------|----------|----------|-----------|--------|--------|---------|---------|
| Value :  | 5.202432 | 5.202446 | 14.014500 | 90.000 | 90.000 | 119.999 | 328.494 |
| Sigmas : | 0.000007 | 0.000007 | 0.000104  | 0.000  | 0.000  | 0.000   | 0.003   |

Reciprocal metric tensor shift factor = 100%

Reciprocal metric tensor sum(shift/error)\*\*2 : 0.00

1SF0  
Page 20

GENLES Version MacOSX Jun 14 18:25:47 2011

Diffractometer coefficients for powder data:

| Histogram : | 1 PNT        | 2 PNT    | 3 PNT        | 4 PNT*  | 5 PXC*  |
|-------------|--------------|----------|--------------|---------|---------|
| C/L1/R/2Th: | 4569.20      | 6162.13  | 2139.59      | 0.00000 | 0.00000 |
| Sigmas :    | 0.354173E-01 | 0.000000 | 0.493395E-01 | 0.00000 | 0.00000 |
| Shift/esd : | -0.01        | 0.00     | -0.01        | 0.00    | 0.00    |





Sigmas :  
Shift/esd:  
Coeff. : L23  
Value : 0.000E+00  
Sigmas :  
Shift/esd:

Profile coefficients for histogram no. 2 and for phase no. 2:

| Coeff.     | alp       | be-0      | be-1      | sg-0      | sg-1      | sg-2       | ga-0      | ga-1      | ga-2      |
|------------|-----------|-----------|-----------|-----------|-----------|------------|-----------|-----------|-----------|
| gsf        |           |           |           |           |           |            |           |           |           |
| Value      | 4.108E+00 | 6.789E-02 | 2.857E-03 | 3.543E+00 | 4.394E+01 | -1.859E+00 | 0.000E+00 | 1.876E-02 | 1.628E+00 |
| 0.000E+00  |           |           |           |           |           |            |           |           |           |
| Sigmas     |           |           |           |           | 3.832E-01 |            |           | 4.968E-02 |           |
| Shift/esd: |           |           |           |           | -0.01     |            |           | 0.02      |           |
| Coeff.     | g1ec      | g2ec      | rstr      | rsta      | rsca      | L11        | L22       | L33       | L12       |
| L13        |           |           |           |           |           |            |           |           |           |
| Value      | 0.000E+00 | 0.000E+00 | 0.000E+00 | 0.000E+00 | 0.000E+00 | 0.000E+00  | 0.000E+00 | 0.000E+00 | 0.000E+00 |
| 0.000E+00  |           |           |           |           |           |            |           |           |           |
| Sigmas     |           |           |           |           |           |            |           |           |           |
| Shift/esd: |           |           |           |           |           |            |           |           |           |
| Coeff.     | L23       |           |           |           |           |            |           |           |           |
| Value      | 0.000E+00 |           |           |           |           |            |           |           |           |
| Sigmas     |           |           |           |           |           |            |           |           |           |
| Shift/esd: |           |           |           |           |           |            |           |           |           |

Profile coefficients for histogram no. 3 and for phase no. 2:

| Coeff.                              | alp       | be-0      | be-1      | sg-0      | sg-1      | sg-2      | ga-0      | ga-1      | ga-2      |
|-------------------------------------|-----------|-----------|-----------|-----------|-----------|-----------|-----------|-----------|-----------|
| gsf                                 |           |           |           |           |           |           |           |           |           |
| Value                               | 1.000E+00 | 5.279E-02 | 2.026E-01 | 2.192E+01 | 7.865E+01 | 1.284E+00 | 0.000E+00 | 0.000E+00 | 0.000E+00 |
| 0.000E+00                           |           |           |           |           |           |           |           |           |           |
| Sigmas                              |           |           |           |           | 8.318E-01 |           |           |           |           |
| Shift/esd:                          |           |           |           |           | 0.00      |           |           |           |           |
| Coeff.                              | g1ec      | g2ec      | rstr      | rsta      | rsca      | L11       | L22       | L33       | L12       |
| L13                                 |           |           |           |           |           |           |           |           |           |
| Value                               | 0.000E+00 |
| 0.000E+00                           |           |           |           |           |           |           |           |           |           |
| Sigmas                              |           |           |           |           |           |           |           |           |           |
| Shift/esd:                          |           |           |           |           |           |           |           |           |           |
| Coeff.                              | L23       |           |           |           |           |           |           |           |           |
| Value                               | 0.000E+00 |           |           |           |           |           |           |           |           |
| Sigmas                              |           |           |           |           |           |           |           |           |           |
| Shift/esd:                          |           |           |           |           |           |           |           |           |           |
| Profile coef. sum(shift/error)**2 : |           |           |           |           |           |           |           |           | 0.00      |

Background coefficients for histogram no. 1:

| Param.     | 1             | 2             | 3             | 4             | 5             | 6             |
|------------|---------------|---------------|---------------|---------------|---------------|---------------|
| Coeff.     | 3.310255E-01  | -1.649298E-02 | 5.384265E-02  | -1.737273E-02 | -8.909297E-03 | -3.880237E-02 |
| Sigmas     | 6.026207E-04  | 8.384967E-04  | 1.042680E-03  | 8.941597E-04  | 8.444989E-04  | 8.442348E-04  |
| Shift/esd: | 0.01          | -0.01         | 0.00          | -0.01         | 0.00          | 0.00          |
| Param.     | 7             | 8             | 9             |               |               |               |
| Coeff.     | -1.790377E-02 | -1.493028E-02 | -6.961925E-03 |               |               |               |
| Sigmas     | 8.422531E-04  | 8.461392E-04  | 8.279817E-04  |               |               |               |
| Shift/esd: | 0.00          | 0.00          | -0.01         |               |               |               |

1SF0

GENLES Version MacOSX Jun 14 18:25:47 2011

Page 22

Background coefficients for histogram no. 2:

| Param.                                 | 1            | 2             | 3             | 4             | 5            | 6             |
|----------------------------------------|--------------|---------------|---------------|---------------|--------------|---------------|
| Coeff.                                 | 2.739778E-01 | -9.744284E-02 | 9.679380E-03  | -1.750145E-02 | 1.120639E-02 | -8.097776E-03 |
| Sigmas                                 | 3.743004E-04 | 4.858064E-04  | 6.158398E-04  | 5.772812E-04  | 5.432080E-04 | 5.315231E-04  |
| Shift/esd:                             | 0.02         | -0.02         | 0.01          | 0.00          | 0.00         | 0.00          |
| Param.                                 | 7            | 8             | 9             | 10            | 11           | 12            |
| Coeff.                                 | 3.169314E-04 | -1.456465E-02 | -6.478267E-03 | 2.394573E-03  | 3.947360E-03 | -1.672721E-02 |
| Sigmas                                 | 5.307352E-04 | 5.276783E-04  | 5.248328E-04  | 5.165406E-04  | 5.124590E-04 | 5.124880E-04  |
| Shift/esd:                             | 0.01         | 0.00          | 0.00          | -0.01         | -0.01        | 0.00          |
| Background coef. sum(shift/error)**2 : |              |               |               |               |              | 0.00          |

CPU times for matrix build 1.51 sec; matrix inversion 0.01 sec  
Final variable sum((shift/esd)\*\*2) for cycle1156: 0.01 Time: 1.52 sec

Convergence was achieved

-----  
Archiving SAFE\_NEUTRON\_FINAL\_STEPHANSS.EXP as SAFE\_NEUTRON\_FINAL\_STEPHANSS.003  
-----

```
|-----|
|   Program PUBTABLES Version MacOSX   |
|   Generate crystal structure data tables |
|   Distributed on Wed Apr 21 18:37:08 2010 |
|-----|
```

```
|-----|
|   Allen C. Larson and Robert B. Von Dreele   |
|   Manuel Lujan, Jr. Neutron Scattering Center, MS-H805 |
|   Los Alamos National Laboratory, Los Alamos, NM 87545 |
|   |                                           |
|   Copyright, 2000, The Regents of the University of California. |
|-----|
```

The last history record is :  
HSTRY 86 EXPGUI 1113 1033 (1 changes) -- 06/14/2011 18:26:17

-----  
Archiving SAFE\_NEUTRON\_FINAL\_STEPHANSS.EXP as SAFE\_NEUTRON\_FINAL\_STEPHANSS.004  
-----

-----  
Archiving SAFE\_NEUTRON\_FINAL\_STEPHANSS.EXP as SAFE\_NEUTRON\_FINAL\_STEPHANSS.005  
-----

```
|-----|
|   Program POWPREF Version Win32           |
|   Prepares powder histograms for least-squares refinement |
|   Distributed on Wed Jun 01 16:54:26 2011 |
|-----|
```

```
|-----|
|   Allen C. Larson and Robert B. Von Dreele   |
|   Manuel Lujan, Jr. Neutron Scattering Center, MS-H805 |
|   Los Alamos National Laboratory, Los Alamos, NM 87545 |
|   |                                           |
|   Copyright, 2000, The Regents of the University of California. |
|-----|
```

The last history record is :  
HSTRY 88 EXPGUI 1113 1033 (1 changes) -- 06/24/11 14:07:17

Data for bank 1 read from file e56881.gsa  
The powder pattern has 4524 channels with 1 bins per channel  
Histogram weight factors are 1.00000 0.00000  
No fixed background points for this powder pattern  
The 2 excluded regions are (in msec):  
Exclude from: to: from: to: from: to:  
0.0000 2.0000 20.0000 1000.0000  
Incident spectrum type 0 can be used in the region 1.000 msec to 20.000 msec  
The minimum possible weighted residual for this histogram is 0.0689  
Histogram no. 1 on file SAFE\_NEUTRON\_FINAL\_STEPHANSS.P01  
updated with new excluded regions, background and incident spectrum data.  
CPU time = 0.00 to update histogram  
Lattice parameters for phase 1 are:  
a,b,c = 5.202475 5.202475 14.014489 angles = 90.000 90.000 120.000  
volume = 328.494  
Lattice parameters for phase 2 are:  
a,b,c = 5.202432 5.202446 14.014500 angles = 90.000 90.000 119.999  
volume = 328.494  
Profile function 3 for phase no. 1 has the coefficients p1-p21:  
0.289766E+00 0.528838E-01 0.746764E-02 0.000000E+00  
0.247043E+02 0.208014E+01 0.000000E+00 0.312877E+01  
0.000000E+00 0.000000E+00 0.000000E+00 0.000000E+00  
0.000000E+00 0.000000E+00 0.000000E+00 0.000000E+00  
0.000000E+00 0.000000E+00 0.000000E+00 0.000000E+00

0.000000E+00  
cutoff on the wings at 0.001 of maximum

Profile function 3 for phase no. 2 has the coefficients p1-p21:  
0.289766E+00 0.528838E-01 0.746764E-02 0.000000E+00  
0.247043E+02 0.208014E+01 0.000000E+00 0.312877E+01  
0.000000E+00 0.000000E+00 0.000000E+00 0.000000E+00  
0.000000E+00 0.000000E+00 0.000000E+00 0.000000E+00  
0.000000E+00 0.000000E+00 0.000000E+00 0.000000E+00

0.000000E+00  
cutoff on the wings at 0.001 of maximum

Minimum d-spacing used to generate reflections 0.4215 for phase 1  
Minimum d-spacing used to generate reflections 0.4215 for phase 2  
Minimum d-spacing used to generate reflections 0.9629 for phase 1  
Minimum d-spacing used to generate reflections 0.9629 for phase 2  
Minimum d-spacing for matching reflections 0.4370  
Estimated number of reflections to be generated is 1760  
Minimum d-spacing for magnetic reflections 1.0000  
Est. number of magnetic reflections to be generated is 914  
Number of reflections generated for phase 1 is 514  
Number of reflections generated for phase 2 is 794  
Total number of reflections generated for all phases is 1308  
CPU time = 0.00 sec. to generate reflections.  
CPU time = 0.20 sec. to locate reflection limits.  
CPU time = 0.00 sec. to match reflection ranges to powder pattern  
The maximum number of reflections contributing to any profile point is 204  
CPU time = 0.00 sec. to update file  
Data for bank 2 read from file c56881.gsa  
The powder pattern has 3756 channels with 1 bins per channel  
Histogram weight factors are 1.00000 0.00000  
No fixed background points for this powder pattern  
The 2 excluded regions are (in msec):  
Exclude from: to: from: to: from: to: from: to:  
0.0000 2.9980 20.0000 1000.0000  
Incident spectrum type 0 can be used in the region 1.000 msec to 20.000 msec  
The number of zero intensities found in this histogram is 2  
The minimum possible weighted residual for this histogram is 0.0391  
Histogram no. 2 on file SAFE\_NEUTRON\_FINAL\_STEPHANSS.P02  
updated with new excluded regions, background and incident spectrum data.  
CPU time = 0.00 to update histogram

Profile function 3 for phase no. 1 has the coefficients p1-p21:  
0.410819E+01 0.678940E-01 0.285702E-02 0.354299E+01  
0.439370E+02 -0.185852E+01 0.000000E+00 0.187598E-01  
0.162805E+01 0.000000E+00 0.000000E+00 0.000000E+00  
0.000000E+00 0.000000E+00 0.000000E+00 0.000000E+00  
0.000000E+00 0.000000E+00 0.000000E+00 0.000000E+00

0.000000E+00  
cutoff on the wings at 0.001 of maximum

Profile function 3 for phase no. 2 has the coefficients p1-p21:  
0.410819E+01 0.678940E-01 0.285702E-02 0.354299E+01  
0.439370E+02 -0.185852E+01 0.000000E+00 0.187598E-01  
0.162805E+01 0.000000E+00 0.000000E+00 0.000000E+00  
0.000000E+00 0.000000E+00 0.000000E+00 0.000000E+00  
0.000000E+00 0.000000E+00 0.000000E+00 0.000000E+00

0.000000E+00  
cutoff on the wings at 0.001 of maximum

Minimum d-spacing used to generate reflections 0.4738 for phase 1  
Minimum d-spacing used to generate reflections 0.4738 for phase 2  
Minimum d-spacing used to generate reflections 0.9765 for phase 1  
Minimum d-spacing used to generate reflections 0.9765 for phase 2  
Minimum d-spacing for matching reflections 0.4858  
Estimated number of reflections to be generated is 1515  
Minimum d-spacing for magnetic reflections 1.0000  
Est. number of magnetic reflections to be generated is 878  
Number of reflections generated for phase 1 is 359  
Number of reflections generated for phase 2 is 734  
Total number of reflections generated for all phases is 1093  
CPU time = 0.02 sec. to generate reflections.  
CPU time = 0.13 sec. to locate reflection limits.  
CPU time = 0.02 sec. to match reflection ranges to powder pattern

The maximum number of reflections contributing to any profile point is 106  
 CPU time = 0.00 sec. to update file  
 Data for bank 3 read from file a56881.gsa  
 The powder pattern has 4821 channels with 1 bins per channel  
 Histogram weight factors are 1.00000 0.00000  
 No fixed background points for this powder pattern  
 The 2 excluded regions are (in msec):  
 Exclude from: to: from: to: from: to: from: to:  
 0.0000 1.5520 20.0000 1000.0000  
 Incident spectrum type 0 can be used in the region 0.500 msec to 20.000 msec  
 The number of zero intensities found in this histogram is 13  
 The minimum possible weighted residual for this histogram is 0.1351  
 Histogram no. 3 on file SAFE\_NEUTRON\_FINAL\_STEPHANSS.P03  
 updated with new excluded regions, background and incident spectrum data.  
 CPU time = 0.00 to update histogram

Profile function 3 for phase no. 1 has the coefficients p1-p21:  
 0.100000E+01 0.527857E-01 0.202603E+00 0.219247E+02  
 0.786492E+02 0.128369E+01 0.000000E+00 0.000000E+00  
 0.000000E+00 0.000000E+00 0.000000E+00 0.000000E+00  
 0.000000E+00 0.000000E+00 0.000000E+00 0.000000E+00  
 0.000000E+00 0.000000E+00 0.000000E+00 0.000000E+00

0.000000E+00  
 cutoff on the wings at 0.001 of maximum

Profile function 3 for phase no. 2 has the coefficients p1-p21:  
 0.100000E+01 0.527857E-01 0.202603E+00 0.219247E+02  
 0.786492E+02 0.128369E+01 0.000000E+00 0.000000E+00  
 0.000000E+00 0.000000E+00 0.000000E+00 0.000000E+00  
 0.000000E+00 0.000000E+00 0.000000E+00 0.000000E+00  
 0.000000E+00 0.000000E+00 0.000000E+00 0.000000E+00

0.000000E+00  
 cutoff on the wings at 0.001 of maximum

Minimum d-spacing used to generate reflections 0.7029 for phase 1  
 Minimum d-spacing used to generate reflections 0.7029 for phase 2  
 Minimum d-spacing used to generate reflections 0.9742 for phase 1  
 Minimum d-spacing used to generate reflections 0.9742 for phase 2  
 Minimum d-spacing for matching reflections 0.7206  
 Estimated number of reflections to be generated is 1169  
 Minimum d-spacing for magnetic reflections 1.0000  
 Est. number of magnetic reflections to be generated is 884  
 Number of reflections generated for phase 1 is 112  
 Number of reflections generated for phase 2 is 746  
 Total number of reflections generated for all phases is 858  
 CPU time = 0.02 sec. to generate reflections.  
 CPU time = 0.09 sec. to locate reflection limits.  
 CPU time = 0.00 sec. to match reflection ranges to powder pattern  
 The maximum number of reflections contributing to any profile point is 128  
 CPU time = 0.00 sec. to update file

```

|-----|
|           Program GENLES Version Win32           |
|   General crystal structure refinement program   |
| Magnetic structure refinement added by M. Yethiraj |
| Revised and corrected by Larson and Von Dreele  |
|           Distributed on Wed Jun 01 16:54:23 2011 |
|-----|
  
```

```

|-----|
|           Allen C. Larson and Robert B. Von Dreele           |
|   Manuel Lujan, Jr. Neutron Scattering Center, MS-H805   |
|   Los Alamos National Laboratory, Los Alamos, NM 87545   |
|           |           |           |           |           |
|   Copyright, 2000, The Regents of the University of California. |
|-----|
  
```

The experiment file is: SAFE\_NEUTRON\_FINAL\_STEPHANSS.EXP  
 The last history record is :  
 HSTRY 89 POWPREF Win32 Jun 24 14:07:18 2011  
 Maximum number of cycles is 99  
 Marquardt factor for matrix inversion = 1.00



|      |   |     |   |   |        |        |        |       |        |       |        |    |     |    |
|------|---|-----|---|---|--------|--------|--------|-------|--------|-------|--------|----|-----|----|
| FE+3 | 2 | FE2 | 1 | 1 | 0.4600 | 0      | 0.6667 | 0     | 0.3333 | 0     | 0.5912 | 0  | 0.5 | D  |
|      |   |     |   |   |        | 2.672  | C      | 0.000 | 0      | 0.000 | 0      |    |     |    |
| FE+3 | 3 | FE3 | 1 | 1 | 0.4600 | 0      | 0.3333 | 0     | 0.6667 | 0     | 0.9246 | 0  | 0.5 | F  |
|      |   |     |   |   |        | 2.672  | E      | 0.000 | 0      | 0.000 | 0      |    |     |    |
| FE+3 | 4 | FE4 | 1 | 1 | 0.4600 | 0      | 0.0000 | 0     | 0.0000 | 0     | 0.7579 | 0  | 0.5 | 11 |
|      |   |     |   |   |        | -2.672 | 10     | 0.000 | 0      | 0.000 | 0      |    |     |    |
| FE+3 | 5 | FE5 | 1 | 1 | 0.4600 | 0      | 0.6667 | 0     | 0.3333 | 0     | 0.0912 | 0  | 0.5 | 13 |
|      |   |     |   |   |        | -2.672 | 12     | 0.000 | 0      | 0.000 | 0      |    |     |    |
| FE+3 | 6 | FE6 | 1 | 1 | 0.4600 | 0      | 0.3333 | 0     | 0.6667 | 0     | 0.4246 | 0  | 0.5 | 15 |
|      |   |     |   |   |        | -2.672 | 14     | 0.000 | 0      | 0.000 | 0      |    |     |    |
| FE+3 | 7 | FE7 | 1 | 1 | 0.5400 | 0      | 0.0000 | 0     | 0.0000 | 0     | 0.0477 | 17 | 0.4 | 18 |
|      |   |     |   |   |        | -2.672 | 16     | 0.000 | 0      | 0.000 | 0      |    |     |    |
| FE+3 | 8 | FE8 | 1 | 1 | 0.5400 | 0      | 0.6667 | 0     | 0.3333 | 0     | 0.3810 | 1A | 0.4 | 1B |
|      |   |     |   |   |        | -2.672 | 18     | 0.000 | 0      | 0.000 | 0      |    |     |    |
|      |   |     |   |   |        | 2.672  | 1C     | 0.000 | 0      | 0.000 | 0      |    |     |    |

1SF0

Page 3

GENLES Version Win32 Jun 24 14:07:24 2011

The atom positions read in are: (all variable numbers (pn) are in hexadecimal)

| Type                            | seq. | At. name | mult | symm | frac   | pn     | X      | pn     | Y      | pn      | Z      | pn      | u11     | pn     | u22     | pn      | u33 | pn      | u12     | pn | u13 | pn | u23 | pn |  |  |
|---------------------------------|------|----------|------|------|--------|--------|--------|--------|--------|---------|--------|---------|---------|--------|---------|---------|-----|---------|---------|----|-----|----|-----|----|--|--|
| FE+3                            | 9    | FE9      | 1    | 1    | 0.5400 | 0      | 0.3333 | 0      | 0.6667 | 0       | 0.7144 | 1D      | 0.4     | 1E     |         |         |     |         |         |    |     |    |     |    |  |  |
|                                 |      |          |      |      |        | -2.672 | 1F     | 0.000  | 0      | 0.000   | 0      |         |         |        |         |         |     |         |         |    |     |    |     |    |  |  |
| FE+3                            | 10   | FE10     | 1    | 1    | 0.5400 | 0      | 0.0000 | 0      | 0.0000 | 0       | 0.5477 | 20      | 0.4     | 21     |         |         |     |         |         |    |     |    |     |    |  |  |
|                                 |      |          |      |      |        | 2.672  | 22     | 0.000  | 0      | 0.000   | 0      |         |         |        |         |         |     |         |         |    |     |    |     |    |  |  |
| FE+3                            | 11   | FE11     | 1    | 1    | 0.5400 | 0      | 0.6667 | 0      | 0.3333 | 0       | 0.8810 | 23      | 0.4     | 24     |         |         |     |         |         |    |     |    |     |    |  |  |
|                                 |      |          |      |      |        | 2.672  | 25     | 0.000  | 0      | 0.000   | 0      |         |         |        |         |         |     |         |         |    |     |    |     |    |  |  |
| FE+3                            | 12   | FE12     | 1    | 1    | 0.5400 | 0      | 0.3333 | 0      | 0.6667 | 0       | 0.2144 | 26      | 0.4     | 27     |         |         |     |         |         |    |     |    |     |    |  |  |
|                                 |      |          |      |      |        | 2.672  | 28     | 0.000  | 0      | 0.000   | 0      |         |         |        |         |         |     |         |         |    |     |    |     |    |  |  |
| Constraints read are            |      |          |      |      |        | LNCN   | 1      | 1      | 1Z     | 1.0000  | 1      | 4Z      | 1.0000  | 2      | 7Z      | 1.0000  | 2   | 8Z      | 1.0000  |    |     |    |     |    |  |  |
|                                 |      |          |      |      |        | LNCN   | 1      | 2      | 9Z     | 1.0000  | 2      | 10Z     | 1.0000  | 2      | 11Z     | 1.0000  | 2   | 12Z     | 1.0000  |    |     |    |     |    |  |  |
|                                 |      |          |      |      |        | LNCN   | 2      | 1      | 1FRAC  | -1.0000 | 1      | 2FRAC   | -1.0000 | 1      | 4FRAC   | 1.0000  | 1   | 5FRAC   | 1.0000  |    |     |    |     |    |  |  |
| Parameter missing - 1           |      |          |      |      |        | 1FRAC  |        |        |        |         |        |         |         |        |         |         |     |         |         |    |     |    |     |    |  |  |
| Parameter missing - 1           |      |          |      |      |        | 2FRAC  |        |        |        |         |        |         |         |        |         |         |     |         |         |    |     |    |     |    |  |  |
| Parameter missing - 1           |      |          |      |      |        | 4FRAC  |        |        |        |         |        |         |         |        |         |         |     |         |         |    |     |    |     |    |  |  |
| Parameter missing - 1           |      |          |      |      |        | 5FRAC  |        |        |        |         |        |         |         |        |         |         |     |         |         |    |     |    |     |    |  |  |
|                                 |      |          |      |      |        | LNCN   | 2      | 2      | 1FRAC  | -1.0000 | 2      | 2FRAC   | -1.0000 | 2      | 3FRAC   | -1.0000 | 2   | 4FRAC   | -1.0000 |    |     |    |     |    |  |  |
| Parameter missing - 2           |      |          |      |      |        | 1FRAC  |        |        |        |         |        |         |         |        |         |         |     |         |         |    |     |    |     |    |  |  |
| Parameter missing - 2           |      |          |      |      |        | 2FRAC  |        |        |        |         |        |         |         |        |         |         |     |         |         |    |     |    |     |    |  |  |
| Parameter missing - 2           |      |          |      |      |        | 3FRAC  |        |        |        |         |        |         |         |        |         |         |     |         |         |    |     |    |     |    |  |  |
| Parameter missing - 2           |      |          |      |      |        | 4FRAC  |        |        |        |         |        |         |         |        |         |         |     |         |         |    |     |    |     |    |  |  |
|                                 |      |          |      |      |        | LNCN   | 2      | 2      | 5FRAC  | -1.0000 | 2      | 6FRAC   | -1.0000 | 2      | 7FRAC   | 1.0000  | 2   | 8FRAC   | 1.0000  |    |     |    |     |    |  |  |
| Parameter missing - 2           |      |          |      |      |        | 5FRAC  |        |        |        |         |        |         |         |        |         |         |     |         |         |    |     |    |     |    |  |  |
| Parameter missing - 2           |      |          |      |      |        | 6FRAC  |        |        |        |         |        |         |         |        |         |         |     |         |         |    |     |    |     |    |  |  |
| Parameter missing - 2           |      |          |      |      |        | 7FRAC  |        |        |        |         |        |         |         |        |         |         |     |         |         |    |     |    |     |    |  |  |
| Parameter missing - 2           |      |          |      |      |        | 8FRAC  |        |        |        |         |        |         |         |        |         |         |     |         |         |    |     |    |     |    |  |  |
|                                 |      |          |      |      |        | LNCN   | 2      | 2      | 9FRAC  | 1.0000  | 2      | 10FRAC  | 1.0000  | 2      | 11FRAC  | 1.0000  | 2   | 12FRAC  | 1.0000  |    |     |    |     |    |  |  |
| Parameter missing - 2           |      |          |      |      |        | 9FRAC  |        |        |        |         |        |         |         |        |         |         |     |         |         |    |     |    |     |    |  |  |
| Parameter missing - 2           |      |          |      |      |        | 10FRAC |        |        |        |         |        |         |         |        |         |         |     |         |         |    |     |    |     |    |  |  |
| Parameter missing - 2           |      |          |      |      |        | 11FRAC |        |        |        |         |        |         |         |        |         |         |     |         |         |    |     |    |     |    |  |  |
| Parameter missing - 2           |      |          |      |      |        | 12FRAC |        |        |        |         |        |         |         |        |         |         |     |         |         |    |     |    |     |    |  |  |
|                                 |      |          |      |      |        | LNCN   | 3      | 1      | 2Z     | 1.0000  | 1      | 5Z      | 1.0000  | 2      | 1Z      | 1.0000  | 2   | 2Z      | 1.0000  |    |     |    |     |    |  |  |
| Parameter missing - 1           |      |          |      |      |        | 2Z     |        |        |        |         |        |         |         |        |         |         |     |         |         |    |     |    |     |    |  |  |
| Parameter missing - 1           |      |          |      |      |        | 5Z     |        |        |        |         |        |         |         |        |         |         |     |         |         |    |     |    |     |    |  |  |
| Parameter missing - 2           |      |          |      |      |        | 1Z     |        |        |        |         |        |         |         |        |         |         |     |         |         |    |     |    |     |    |  |  |
| Parameter missing - 2           |      |          |      |      |        | 2Z     |        |        |        |         |        |         |         |        |         |         |     |         |         |    |     |    |     |    |  |  |
|                                 |      |          |      |      |        | LNCN   | 3      | 2      | 3Z     | 1.0000  | 2      | 4Z      | 1.0000  | 2      | 5Z      | 1.0000  | 2   | 6Z      | 1.0000  |    |     |    |     |    |  |  |
| Parameter missing - 2           |      |          |      |      |        | 3Z     |        |        |        |         |        |         |         |        |         |         |     |         |         |    |     |    |     |    |  |  |
| Parameter missing - 2           |      |          |      |      |        | 4Z     |        |        |        |         |        |         |         |        |         |         |     |         |         |    |     |    |     |    |  |  |
| Parameter missing - 2           |      |          |      |      |        | 5Z     |        |        |        |         |        |         |         |        |         |         |     |         |         |    |     |    |     |    |  |  |
| Parameter missing - 2           |      |          |      |      |        | 6Z     |        |        |        |         |        |         |         |        |         |         |     |         |         |    |     |    |     |    |  |  |
|                                 |      |          |      |      |        | LNCN   | 4      | 1      | 1UIISO | 1.0000  | 1      | 4UIISO  | 1.0000  | 2      | 7UIISO  | 1.0000  | 2   | 8UIISO  | 1.0000  |    |     |    |     |    |  |  |
|                                 |      |          |      |      |        | LNCN   | 4      | 2      | 9UIISO | 1.0000  | 2      | 10UIISO | 1.0000  | 2      | 11UIISO | 1.0000  | 2   | 12UIISO | 1.0000  |    |     |    |     |    |  |  |
|                                 |      |          |      |      |        | LNCN   | 5      | 2      | 1MX    | 1.0000  | 2      | 2MX     | 1.0000  | 2      | 3MX     | 1.0000  | 2   | 10MX    | 1.0000  |    |     |    |     |    |  |  |
|                                 |      |          |      |      |        | LNCN   | 5      | 2      | 11MX   | 1.0000  | 2      | 12MX    | 1.0000  | 2      | 4MX     | -1.0000 | 2   | 5MX     | -1.0000 |    |     |    |     |    |  |  |
|                                 |      |          |      |      |        | LNCN   | 5      | 2      | 6MX    | -1.0000 | 2      | 7MX     | -1.0000 | 2      | 8MX     | -1.0000 | 2   | 9MX     | -1.0000 |    |     |    |     |    |  |  |
|                                 |      |          |      |      |        | LNCN   | 6      | 1      | 2UIISO | 1.0000  | 1      | 5UIISO  | 1.0000  | 2      | 1UIISO  | 1.0000  | 2   | 2UIISO  | 1.0000  |    |     |    |     |    |  |  |
|                                 |      |          |      |      |        | LNCN   | 6      | 2      | 3UIISO | 1.0000  | 2      | 4UIISO  | 1.0000  | 2      | 5UIISO  | 1.0000  | 2   | 6UIISO  | 1.0000  |    |     |    |     |    |  |  |
| Constraint no. 1 for type RMTN: |      |          |      |      |        | 1      | RM33   | 1.0000 | 2      | RM33    | 1.0000 |         |         |        |         |         |     |         |         |    |     |    |     |    |  |  |
| Constraint no. 2 for type RMTN: |      |          |      |      |        | 1      | RM11   | 1.0000 | 2      | RM11    | 1.0000 | 2       | RM22    | 1.0000 |         |         |     |         |         |    |     |    |     |    |  |  |

1SF0

Page 4

GENLES Version Win32 Jun 24 14:07:24 2011

Lattice parameters for phase 1 are:

|          |          |           |         |         |          |
|----------|----------|-----------|---------|---------|----------|
| a        | b        | c         | alpha   | beta    | gamma    |
| 5.202475 | 5.202475 | 14.014489 | 90.0000 | 90.0000 | 120.0000 |

These cell parameters will be refined

Reciprocal metric tensor elements:

|           |             |    |             |    |             |    |             |    |              |    |              |   |
|-----------|-------------|----|-------------|----|-------------|----|-------------|----|--------------|----|--------------|---|
| Element : | g11         | pn | g22         | pn | g33         | pn | 2*g12       | pn | 2*g13        | pn | 2*g23        |   |
| Value :   | 4.92628E-02 | 29 | 4.92628E-02 | 2A | 5.09150E-03 | 2B | 4.92628E-02 | 2C | -6.67561E-10 | 0  | -6.67561E-10 | 0 |
| Constr. : | 1.000       | 2  | 1.000       | 2  | 1.000       | 2  | 1.000       | 2  | 0.000        | 0  | 0.000        | 0 |

Lattice parameters for phase 2 are:

|          |          |           |         |         |          |
|----------|----------|-----------|---------|---------|----------|
| a        | b        | c         | alpha   | beta    | gamma    |
| 5.202432 | 5.202446 | 14.014500 | 90.0000 | 90.0000 | 119.9987 |

These cell parameters will be refined

Reciprocal metric tensor elements:

|           |             |    |             |    |             |    |             |    |              |    |              |   |
|-----------|-------------|----|-------------|----|-------------|----|-------------|----|--------------|----|--------------|---|
| Element : | g11         | pn | g22         | pn | g33         | pn | 2*g12       | pn | 2*g13        | pn | 2*g23        |   |
| Value :   | 4.92623E-02 | 2D | 4.92620E-02 | 2E | 5.09149E-03 | 2F | 4.92602E-02 | 0  | -6.67539E-10 | 0  | -6.67538E-10 | 0 |
| Constr. : | 1.000       | 2  | 1.000       | 2  | 1.000       | 2  | 1.000       | 0  | 1.000        | 0  | 1.000        | 0 |

Phase/element fractions for phase no. 1

|           |        |       |   |        |       |   |        |       |     |        |       |    |             |       |   |             |       |   |             |       |   |
|-----------|--------|-------|---|--------|-------|---|--------|-------|-----|--------|-------|----|-------------|-------|---|-------------|-------|---|-------------|-------|---|
| Hist Elm: | PNT    | 1     | 1 | nc     | PNT   | 2 | 1      | nc    | PNT | 3      | 1     | nc | PNT*        | 4     | 1 | nc          | PXC*  | 5 | 1           | nc    |   |
| Fraction: | 1.0000 |       | 0 | 1.0000 |       | 0 | 1.0000 |       | 0   | 1.0000 |       | 0  | not present |       | 0 | not present |       | 0 | not present |       | 0 |
| Dmp/Cnst: | 0      | 0.000 | 0 | 0      | 0.000 | 0 | 0      | 0.000 | 0   | 0      | 0.000 | 0  | 0           | 0.000 | 0 | 0           | 0.000 | 0 | 0           | 0.000 | 0 |

Phase/element fractions for phase no. 2

|           |        |       |   |        |       |   |        |       |     |        |       |    |             |       |   |             |       |   |             |       |   |
|-----------|--------|-------|---|--------|-------|---|--------|-------|-----|--------|-------|----|-------------|-------|---|-------------|-------|---|-------------|-------|---|
| Hist Elm: | PNT    | 1     | 1 | nc     | PNT   | 2 | 1      | nc    | PNT | 3      | 1     | nc | PNT*        | 4     | 1 | nc          | PXC*  | 5 | 1           | nc    |   |
| Fraction: | 1.0000 |       | 0 | 1.0000 |       | 0 | 1.0000 |       | 0   | 1.0000 |       | 0  | not present |       | 0 | not present |       | 0 | not present |       | 0 |
| Dmp/Cnst: | 0      | 0.000 | 0 | 0      | 0.000 | 0 | 0      | 0.000 | 0   | 0      | 0.000 | 0  | 0           | 0.000 | 0 | 0           | 0.000 | 0 | 0           | 0.000 | 0 |

Histogram scale factors:

|           |        |       |    |        |       |    |        |       |    |        |       |    |        |       |    |
|-----------|--------|-------|----|--------|-------|----|--------|-------|----|--------|-------|----|--------|-------|----|
| Hist/Typ: | 1      | PNT   | pn | 2      | PNT   | pn | 3      | PNT   | pn | 4      | PNT*  | pn | 5      | PXC*  | pn |
| Scale :   | 8.7605 |       | 30 | 8.7632 |       | 31 | 10.066 |       | 32 | 0.0000 |       | 0  | 0.0000 |       | 0  |
| Dmp/Cnst: | 0      | 1.000 | 3  | 0      | 1.000 | 4  | 0      | 1.000 | 5  | 0      | 0.000 | 0  | 0      | 0.000 | 0  |

Absorption coefficients for powder data:

|           |             |       |   |             |       |     |             |       |   |        |       |    |        |       |   |        |       |      |        |       |   |
|-----------|-------------|-------|---|-------------|-------|-----|-------------|-------|---|--------|-------|----|--------|-------|---|--------|-------|------|--------|-------|---|
| Hist/Typ: | 1           | PNT   | 0 | pn          | 2     | PNT | 0           | pn    | 3 | PNT    | 0     | pn | 4      | PNT*  | 0 | pn     | 5     | PXC* | 0      | pn    |   |
| Absc 1. : | 0.21758E-01 |       | 0 | 0.21758E-01 |       | 0   | 0.21758E-01 |       | 0 | 0.0000 |       | 0  | 0.0000 |       | 0 | 0.0000 |       | 0    | 0.0000 |       | 0 |
| Dmp/Cnst: | 0           | 0.000 | 0 | 0           | 0.000 | 0   | 0           | 0.000 | 0 | 0      | 0.000 | 0  | 0      | 0.000 | 0 | 0      | 0.000 | 0    | 0      | 0.000 | 0 |
| Absc 2. : | 0.0000      |       | 0 | 0.0000      |       | 0   | 0.0000      |       | 0 | 0.0000 |       | 0  | 0.0000 |       | 0 | 0.0000 |       | 0    | 0.0000 |       | 0 |
| Dmp/Cnst: | 0           | 0.000 | 0 | 0           | 0.000 | 0   | 0           | 0.000 | 0 | 0      | 0.000 | 0  | 0      | 0.000 | 0 | 0      | 0.000 | 0    | 0      | 0.000 | 0 |

1SFO

GENLES Version Win32 Jun 24 14:07:24 2011

Page 5

Diffraction constants for powder data:

|          |         |    |       |    |       |    |       |    |      |
|----------|---------|----|-------|----|-------|----|-------|----|------|
| No. Type | Dif C   | pn | Dif A | pn | Zero  | pn | Cnstr | cn | Damp |
| 1 PNT    | 4569.20 | 33 | -0.97 | 35 | 1.900 | 0  | 0.000 | 0  | 0    |
| No. Type | Dif C   | pn | Dif A | pn | Zero  | pn | Cnstr | cn | Damp |
| 2 PNT    | 6162.13 | 0  | -2.51 | 0  | 3.850 | 0  | 0.000 | 0  | 0    |
| No. Type | Dif C   | pn | Dif A | pn | Zero  | pn | Cnstr | cn | Damp |
| 3 PNT    | 2139.59 | 34 | 1.30  | 36 | 9.030 | 0  | 0.000 | 0  | 0    |

Extinction coefficients for phase no. 1:

|           |        |       |    |        |       |    |        |       |    |        |       |    |        |       |    |
|-----------|--------|-------|----|--------|-------|----|--------|-------|----|--------|-------|----|--------|-------|----|
| Hist/Typ: | 1      | PNT   | pn | 2      | PNT   | pn | 3      | PNT   | pn | 4      | PNT*  | pn | 5      | PXC*  | pn |
| Extinct.: | 0.0000 |       | 0  | 0.0000 |       | 0  | 0.0000 |       | 0  | 0.0000 |       | 0  | 0.0000 |       | 0  |
| Dmp/Cnst: | 0      | 0.000 | 0  | 0      | 0.000 | 0  | 0      | 0.000 | 0  | 0      | 0.000 | 0  | 0      | 0.000 | 0  |

Extinction coefficients for phase no. 2:

|           |        |       |    |        |       |    |        |       |    |        |       |    |             |       |    |
|-----------|--------|-------|----|--------|-------|----|--------|-------|----|--------|-------|----|-------------|-------|----|
| Hist/Typ: | 1      | PNT   | pn | 2      | PNT   | pn | 3      | PNT   | pn | 4      | PNT*  | pn | 5           | PXC*  | pn |
| Extinct.: | 0.0000 |       | 0  | 0.0000 |       | 0  | 0.0000 |       | 0  | 0.0000 |       | 0  | not present |       | 0  |
| Dmp/Cnst: | 0      | 0.000 | 0  | 0      | 0.000 | 0  | 0      | 0.000 | 0  | 0      | 0.000 | 0  | 0           | 0.000 | 0  |

Radiation damage coefficients for phase no. 1:



Hist/Typ: 1 PNT pn 2 PNT pn 3 PNT pn 4 PNT\* pn 5 PXC\* pn  
 Rad.dam.: 0.0000 0 0.0000 0 0.0000 0 0.0000 0 0.0000 0  
 Dmp/Cnst: 0 0.000 0 0 0.000 0 0 0.000 0 0 0.000 0

Radiation damage coefficients for phase no. 2:

Hist/Typ: 1 PNT pn 2 PNT pn 3 PNT pn 4 PNT\* pn 5 PXC\* pn  
 Rad.dam.: 0.0000 0 0.0000 0 0.0000 0 0.0000 0 not present  
 Dmp/Cnst: 0 0.000 0 0 0.000 0 0 0.000 0 0 0.000 0

Preferred orientation coeffs. for phase no. 1 histogram no. 1:

Axis : 1 pn  
 Dir./typ: 0.0 0.0 1.0 0  
 PO ratio: 1.0000 0  
 Dmp/Cnst: 0 0.000 0  
 PO frac.: 1.0000 0  
 Dmp/Cnst: 0 0.000 0

1SFO

GENLES Version Win32 Jun 24 14:07:24 2011

Page 6

Preferred orientation coeffs. for phase no. 1 histogram no. 2:

Axis : 1 pn  
 Dir./typ: 0.0 0.0 1.0 0  
 PO ratio: 1.0000 0  
 Dmp/Cnst: 0 0.000 0  
 PO frac.: 1.0000 0  
 Dmp/Cnst: 0 0.000 0

Preferred orientation coeffs. for phase no. 1 histogram no. 3:

Axis : 1 pn  
 Dir./typ: 0.0 0.0 1.0 0  
 PO ratio: 1.0000 0  
 Dmp/Cnst: 0 0.000 0  
 PO frac.: 1.0000 0  
 Dmp/Cnst: 0 0.000 0

Preferred orientation coeffs. for phase no. 2 histogram no. 1:

Axis : 1 pn  
 Dir./typ: 0.0 0.0 1.0 0  
 PO ratio: 1.0000 0  
 Dmp/Cnst: 0 0.000 0  
 PO frac.: 1.0000 0  
 Dmp/Cnst: 0 0.000 0

Preferred orientation coeffs. for phase no. 2 histogram no. 2:

Axis : 1 pn  
 Dir./typ: 0.0 0.0 1.0 0  
 PO ratio: 1.0000 0  
 Dmp/Cnst: 0 0.000 0  
 PO frac.: 1.0000 0  
 Dmp/Cnst: 0 0.000 0

Preferred orientation coeffs. for phase no. 2 histogram no. 3:

Axis : 1 pn  
 Dir./typ: 0.0 0.0 1.0 0  
 PO ratio: 1.0000 0  
 Dmp/Cnst: 0 0.000 0  
 PO frac.: 1.0000 0  
 Dmp/Cnst: 0 0.000 0

Constraint no. 1 for type PF 5: ALL,1 1.000  
 Constraint no. 2 for type PF 5: ALL,2 1.000  
 Constraint no. 3 for type PF 5: ALL,3 1.000

Constraint no. 1 for type PF 8: ALL,1 1.000  
 Constraint no. 2 for type PF 8: ALL,2 1.000  
 Constraint no. 3 for type PF 8: ALL,3 1.000

1SFO

GENLES Version Win32 Jun 24 14:07:24 2011

Page 7

Profile coeff. for function type 3, phase no. 1 and histogram no. 1; aniso. axis 0. 0. 1.; damp= 0:  
 Coeff. : alp pn be-0 pn be-1 pn sg-0 pn sg-1 pn sg-2 pn ga-0 pn  
 ga-1 pn

Value : 2.898E-01 0 5.288E-02 0 7.468E-03 0 0.000E+00 0 2.470E+01 37 2.080E+00 0 0.000E+00 0  
 3.129E+00 3D  
 Constr. : 0.000 0 0.000 0 0.000 0 0.000 0 1.000 10 0.000 0 0.000 0  
 1.000 13  
 Coeff. : ga-2 pn gsf pn g1ec pn g2ec pn rstr pn rsta pn rsca pn  
 L11 pn  
 Value : 0.000E+00 0 0.000E+00 0 0.000E+00 0 0.000E+00 0 0.000E+00 0 0.000E+00 0  
 0.000E+00 0  
 Constr. : 0.000 0 0.000 0 0.000 0 0.000 0 0.000 0 0.000 0 0.000 0  
 0.000 0  
 Coeff. : L22 pn L33 pn L12 pn L13 pn L23 pn  
 Value : 0.000E+00 0 0.000E+00 0 0.000E+00 0 0.000E+00 0  
 Constr. : 0.000 0 0.000 0 0.000 0 0.000 0 0.000 0

Profile coeff. for function type 3, phase no. 1 and histogram no. 2; aniso. axis 0. 0. 1.; damp= 0:  
 Coeff. : alp pn be-0 pn be-1 pn sg-0 pn sg-1 pn sg-2 pn ga-0 pn  
 ga-1 pn  
 Value : 4.108E+00 0 6.789E-02 0 2.857E-03 0 3.543E+00 0 4.394E+01 38-1.859E+00 0 0.000E+00 0  
 1.876E-02 3E  
 Constr. : 0.000 0 0.000 0 0.000 0 0.000 0 1.000 11 0.000 0 0.000 0  
 1.000 14  
 Coeff. : ga-2 pn gsf pn g1ec pn g2ec pn rstr pn rsta pn rsca pn  
 L11 pn  
 Value : 1.628E+00 0 0.000E+00 0 0.000E+00 0 0.000E+00 0 0.000E+00 0 0.000E+00 0  
 0.000E+00 0  
 Constr. : 0.000 0 0.000 0 0.000 0 0.000 0 0.000 0 0.000 0 0.000 0  
 0.000 0  
 Coeff. : L22 pn L33 pn L12 pn L13 pn L23 pn  
 Value : 0.000E+00 0 0.000E+00 0 0.000E+00 0 0.000E+00 0  
 Constr. : 0.000 0 0.000 0 0.000 0 0.000 0 0.000 0

Profile coeff. for function type 3, phase no. 1 and histogram no. 3; aniso. axis 0. 0. 1.; damp= 0:  
 Coeff. : alp pn be-0 pn be-1 pn sg-0 pn sg-1 pn sg-2 pn ga-0 pn  
 ga-1 pn  
 Value : 1.000E+00 0 5.279E-02 0 2.026E-01 0 2.192E+01 0 7.865E+01 39 1.284E+00 0 0.000E+00 0  
 0.000E+00 0  
 Constr. : 0.000 0 0.000 0 0.000 0 0.000 0 1.000 12 0.000 0 0.000 0  
 0.000 0  
 Coeff. : ga-2 pn gsf pn g1ec pn g2ec pn rstr pn rsta pn rsca pn  
 L11 pn  
 Value : 0.000E+00 0 0.000E+00 0 0.000E+00 0 0.000E+00 0 0.000E+00 0 0.000E+00 0  
 0.000E+00 0  
 Constr. : 0.000 0 0.000 0 0.000 0 0.000 0 0.000 0 0.000 0 0.000 0  
 0.000 0  
 Coeff. : L22 pn L33 pn L12 pn L13 pn L23 pn  
 Value : 0.000E+00 0 0.000E+00 0 0.000E+00 0 0.000E+00 0  
 Constr. : 0.000 0 0.000 0 0.000 0 0.000 0 0.000 0

Profile coeff. for function type 3, phase no. 2 and histogram no. 1; aniso. axis 0. 0. 1.; damp= 0:  
 Coeff. : alp pn be-0 pn be-1 pn sg-0 pn sg-1 pn sg-2 pn ga-0 pn  
 ga-1 pn  
 Value : 2.898E-01 0 5.288E-02 0 7.468E-03 0 0.000E+00 0 2.470E+01 3A 2.080E+00 0 0.000E+00 0  
 3.129E+00 3F  
 Constr. : 0.000 0 0.000 0 0.000 0 0.000 0 1.000 10 0.000 0 0.000 0  
 1.000 13  
 Coeff. : ga-2 pn gsf pn g1ec pn g2ec pn rstr pn rsta pn rsca pn  
 L11 pn  
 Value : 0.000E+00 0 0.000E+00 0 0.000E+00 0 0.000E+00 0 0.000E+00 0 0.000E+00 0  
 0.000E+00 0  
 Constr. : 0.000 0 0.000 0 0.000 0 0.000 0 0.000 0 0.000 0 0.000 0  
 0.000 0  
 Coeff. : L22 pn L33 pn L12 pn L13 pn L23 pn  
 Value : 0.000E+00 0 0.000E+00 0 0.000E+00 0 0.000E+00 0  
 Constr. : 0.000 0 0.000 0 0.000 0 0.000 0 0.000 0

Profile coeff. for function type 3, phase no. 2 and histogram no. 2; aniso. axis 0. 0. 1.; damp= 0:  
 Coeff. : alp pn be-0 pn be-1 pn sg-0 pn sg-1 pn sg-2 pn ga-0 pn  
 ga-1 pn  
 Value : 4.108E+00 0 6.789E-02 0 2.857E-03 0 3.543E+00 0 4.394E+01 3B-1.859E+00 0 0.000E+00 0  
 1.876E-02 40  
 Constr. : 0.000 0 0.000 0 0.000 0 0.000 0 1.000 11 0.000 0 0.000 0  
 1.000 14  
 Coeff. : ga-2 pn gsf pn g1ec pn g2ec pn rstr pn rsta pn rsca pn  
 L11 pn  
 Value : 1.628E+00 0 0.000E+00 0 0.000E+00 0 0.000E+00 0 0.000E+00 0 0.000E+00 0  
 0.000E+00 0  
 Constr. : 0.000 0 0.000 0 0.000 0 0.000 0 0.000 0

Constr. : 0.000 0 0.000 0 0.000 0 0.000 0 0.000 0 0.000 0 0.000 0  
 0.000 0  
 Coeff. : L22 pn L33 pn L12 pn L13 pn L23 pn  
 Value : 0.000E+00 0 0.000E+00 0 0.000E+00 0 0.000E+00 0 0.000E+00 0  
 Constr. : 0.000 0 0.000 0 0.000 0 0.000 0 0.000 0

1SF0

GENLES Version Win32 Jun 24 14:07:24 2011

Page 8

Profile coeff. for function type 3, phase no. 2 and histogram no. 3; aniso. axis 0. 0. 1.; damp= 0:  
 Coeff. : alp pn be-0 pn be-1 pn sg-0 pn sg-1 pn sg-2 pn ga-0 pn  
 ga-1 pn  
 Value : 1.000E+00 0 5.279E-02 0 2.026E-01 0 2.192E+01 0 7.865E+01 3C 1.284E+00 0 0.000E+00 0  
 0.000E+00 0  
 Constr. : 0.000 0 0.000 0 0.000 0 0.000 0 1.000 12 0.000 0 0.000 0  
 0.000 0  
 Coeff. : ga-2 pn gsf pn g1ec pn g2ec pn rstr pn rsta pn rsca pn  
 L11 pn  
 Value : 0.000E+00 0 0.000E+00 0 0.000E+00 0 0.000E+00 0 0.000E+00 0 0.000E+00 0  
 0.000E+00 0  
 Constr. : 0.000 0 0.000 0 0.000 0 0.000 0 0.000 0 0.000 0 0.000 0  
 0.000 0  
 Coeff. : L22 pn L33 pn L12 pn L13 pn L23 pn  
 Value : 0.000E+00 0 0.000E+00 0 0.000E+00 0 0.000E+00 0 0.000E+00 0  
 Constr. : 0.000 0 0.000 0 0.000 0 0.000 0 0.000 0

Diffuse scattering coefficients for powder data:

No diffuse scattering coefficients for histogram 1  
 No diffuse scattering coefficients for histogram 2  
 No diffuse scattering coefficients for histogram 3

Background coefficients for powder data:

Histogram no.: 1 Damping factor: 0 Use all points: Y  
 Shifted Chebyshev function of first kind  
 Param. : 1 pn 2 pn 3 pn 4 pn 5 pn 6 pn  
 Coeff. : 0.33103E+00 41-0.16493E-01 43 0.53843E-01 45-0.17373E-01 47-0.89093E-02 49-0.38802E-01 4B  
 Param. : 7 pn 8 pn 9 pn  
 Coeff. : -0.17904E-01 4D-0.14930E-01 4F-0.69619E-02 51  
 Histogram no.: 2 Damping factor: 0 Use all points: Y  
 Shifted Chebyshev function of first kind  
 Param. : 1 pn 2 pn 3 pn 4 pn 5 pn 6 pn  
 Coeff. : 0.27398E+00 42-0.97443E-01 44 0.96794E-02 46-0.17501E-01 48 0.11206E-01 4A-0.80978E-02 4C  
 Param. : 7 pn 8 pn 9 pn 10 pn 11 pn 12 pn  
 Coeff. : 0.31693E-03 4E-0.14565E-01 50-0.64783E-02 52 0.23946E-02 53 0.39474E-02 54-0.16727E-01 55  
 Histogram no.: 3 Damping factor: 0 Use all points: Y  
 Shifted Chebyshev function of first kind  
 Param. : 1 pn 2 pn 3 pn 4 pn 5 pn 6 pn  
 Coeff. : 0.29912E+00 0-0.31899E-01 0-0.42900E-02 0-0.15951E-01 0 0.19462E-01 0-0.11893E-01 0  
 Param. : 7 pn 8 pn 9 pn 10 pn  
 Coeff. : -0.25533E-01 0 0.40060E-02 0 0.13208E-01 0-0.14414E-01 0

The constraint matrix has 85 terms

1SF0

GENLES Version Win32 Jun 24 14:07:24 2011

Page 9

Restraint data statistics:

No restraints used

| Powder data statistics |      |       | Fitted      |        | -Bknd  |        | pFree  |        | Average |        |     |          |       |
|------------------------|------|-------|-------------|--------|--------|--------|--------|--------|---------|--------|-----|----------|-------|
|                        | Bank | Ndata | Sum(w*d**2) | wRp    | Rp     | wRp    | Rp     | wRp    | Rp      | Npfree | Dwd | Integral |       |
| Hstgm                  | 1    | PNT   | 1 4524      | 4595.3 | 0.0694 | 0.1158 | 3.0673 | 0.6237 | 0.0000  | 0.0000 | 0   | 0.658    | 0.982 |
| Hstgm                  | 2    | PNT   | 2 3753      | 4939.8 | 0.0449 | 0.0942 | 0.1097 | 0.1131 | 0.0000  | 0.0000 | 0   | 0.462    | 0.990 |
| Hstgm                  | 3    | PNT   | 3 4808      | 4302.6 | 0.1278 | 0.1742 | 3.2083 | 0.7146 | 0.0000  | 0.0000 | 0   | 0.733    | 0.997 |
| Powder totals          |      |       | 13085       | 13838. | 0.0614 | 0.1235 | 1.9262 | 0.4499 | 0.0000  | 0.0000 | 0   | 0.611    |       |

No serial correlation in fit at 90% confidence for 1.952 < Dwd < 2.048

Cycle1157 There were 13085 observations.

Total before-cycle CHI\*\*2 (offset/sig) = 1.3838E+04 ( 4.9265E+00)

Reduced CHI\*\*2 = 1.061 for 43 variables

Reflection data statistics

Histogram 1 Type PNT Nobs = 1302 R(F\*\*2) = 0.1131

Histogram 2 Type PNT Nobs = 1071 R(F\*\*2) = 0.0970

Histogram 3 Type PNT Nobs = 857 R(F\*\*2) = 0.0802

After matrix normalization and Marquardt modification:

1 Columns of the 43 Column matrix are 0.0  
 Full matrix recip. condition value & -log10 = 0.2038E-03 3.69  
 Variable NoVarabl was not refined

The value of the determinant is 1.2658\*10.0\*\*( -22)

Atom parameters for phase no. 1

|           | frac        | x       | y                     | z         | 100*Uiso | 100*U11 | 100*U22 | 100*U33 | 100*U12 | 100*U13 |
|-----------|-------------|---------|-----------------------|-----------|----------|---------|---------|---------|---------|---------|
| 100*U23   |             |         |                       |           |          |         |         |         |         |         |
| SC+3 ( 1) | Values      | : 0.460 | 0.000000              | 0.000000  | 0.047674 | 0.347   |         |         |         |         |
|           | Sigmas      | :       |                       |           | 0.000050 | 0.033   |         |         |         |         |
|           | Shft/esd:   |         |                       |           | -0.25    | -0.94   |         |         |         |         |
| Sc1       | moved 0.00A |         | sum(shift/e.s.d)**2 : | 0.95      |          |         |         |         |         |         |
| FE+3 ( 2) | Values      | : 0.460 | 0.000000              | 0.000000  | 0.257903 | 0.548   |         |         |         |         |
|           | Sigmas      | :       |                       |           |          | 0.036   |         |         |         |         |
|           | Shft/esd:   |         |                       |           |          | 1.05    |         |         |         |         |
| Fe1       | moved 0.00A |         | sum(shift/e.s.d)**2 : | 1.10      |          |         |         |         |         |         |
| 0 ( 3)    | Values      | : 1.000 | 0.342321              | -0.026074 | 0.817598 | 0.487   |         |         |         |         |
|           | Sigmas      | :       | 0.000384              | 0.000225  | 0.000225 | 0.010   |         |         |         |         |
|           | Shft/esd:   |         | -0.28                 | -0.25     | 0.10     | 0.51    |         |         |         |         |
| 01        | moved 0.00A |         | sum(shift/e.s.d)**2 : | 0.41      |          |         |         |         |         |         |
| FE+3 ( 4) | Values      | : 0.540 | 0.000000              | 0.000000  | 0.047674 | 0.347   |         |         |         |         |
|           | Sigmas      | :       |                       |           | 0.000050 | 0.033   |         |         |         |         |
|           | Shft/esd:   |         |                       |           | -0.25    | -0.94   |         |         |         |         |
| Fe2       | moved 0.00A |         | sum(shift/e.s.d)**2 : | 0.95      |          |         |         |         |         |         |

1SF0

GENLES Version Win32 Jun 24 14:07:26 2011

Page 10

|           |             |         |                       |          |          |       |  |  |  |  |
|-----------|-------------|---------|-----------------------|----------|----------|-------|--|--|--|--|
| SC+3 ( 5) | Values      | : 0.540 | 0.000000              | 0.000000 | 0.257903 | 0.548 |  |  |  |  |
|           | Sigmas      | :       |                       |          |          | 0.036 |  |  |  |  |
|           | Shft/esd:   |         |                       |          |          | 1.05  |  |  |  |  |
| Sc2       | moved 0.00A |         | sum(shift/e.s.d)**2 : | 1.10     |          |       |  |  |  |  |

Maximum atom shift: 0.00

Atomic parameter sum(shift/error)\*\*2 for phase 1 : 4.53

Calculated unit cell formula weight: 892.800, density: 4.513gm/cm\*\*3

Atom parameters for phase no. 2

|           | frac        | x       | y                     | z        | 100*Uiso | 100*U11 | 100*U22 | 100*U33 | 100*U12 | 100*U13 |
|-----------|-------------|---------|-----------------------|----------|----------|---------|---------|---------|---------|---------|
| 100*U23   |             |         |                       |          |          |         |         |         |         |         |
|           |             | Mx      | My                    | Mz       | Moment   | Theta   | Psi     |         |         |         |
| FE+3 ( 1) | Values      | : 0.460 | 0.000000              | 0.000000 | 0.257890 | 0.548   |         |         |         |         |
|           | Sigmas      | :       |                       |          |          | 0.036   |         |         |         |         |
|           | Shft/esd:   |         |                       |          |          | 1.05    |         |         |         |         |
| FE+3 ( 1) | Moments     | :       | 2.669                 | 0.000    | 0.000    | 2.669   | 90.000  | 0.000   |         |         |
|           | Sigmas      | :       | 0.043                 |          |          | 0.043   | 0.000   | 0.000   |         |         |
|           | Shft/esd:   |         | -0.05                 |          |          |         |         |         |         |         |
| FE1       | moved 0.00A |         | sum(shift/e.s.d)**2 : | 1.11     |          |         |         |         |         |         |
| FE+3 ( 2) | Values      | : 0.460 | 0.666670              | 0.333330 | 0.591220 | 0.548   |         |         |         |         |
|           | Sigmas      | :       |                       |          |          | 0.036   |         |         |         |         |
|           | Shft/esd:   |         |                       |          |          | 1.05    |         |         |         |         |
| FE+3 ( 2) | Moments     | :       | 2.669                 | 0.000    | 0.000    | 2.669   | 90.000  | 0.000   |         |         |
|           | Sigmas      | :       | 0.043                 |          |          | 0.043   | 0.000   | 0.000   |         |         |
|           | Shft/esd:   |         | -0.05                 |          |          |         |         |         |         |         |
| FE2       | moved 0.00A |         | sum(shift/e.s.d)**2 : | 1.11     |          |         |         |         |         |         |
| FE+3 ( 3) | Values      | : 0.460 | 0.333330              | 0.666670 | 0.924560 | 0.548   |         |         |         |         |
|           | Sigmas      | :       |                       |          |          | 0.036   |         |         |         |         |
|           | Shft/esd:   |         |                       |          |          | 1.05    |         |         |         |         |
| FE+3 ( 3) | Moments     | :       | 2.669                 | 0.000    | 0.000    | 2.669   | 90.000  | 0.000   |         |         |
|           | Sigmas      | :       | 0.043                 |          |          | 0.043   | 0.000   | 0.000   |         |         |
|           | Shft/esd:   |         | -0.05                 |          |          |         |         |         |         |         |
| FE3       | moved 0.00A |         | sum(shift/e.s.d)**2 : | 1.11     |          |         |         |         |         |         |
| FE+3 ( 4) | Values      | : 0.460 | 0.000000              | 0.000000 | 0.757890 | 0.548   |         |         |         |         |
|           | Sigmas      | :       |                       |          |          | 0.036   |         |         |         |         |
|           | Shft/esd:   |         |                       |          |          | 1.05    |         |         |         |         |

|      |             |                       |        |       |       |       |        |         |
|------|-------------|-----------------------|--------|-------|-------|-------|--------|---------|
| FE+3 | ( 4)        | Moments :             | -2.669 | 0.000 | 0.000 | 2.669 | 90.000 | 180.000 |
|      |             | Sigmas :              | 0.043  |       |       | 0.043 | 0.000  | 0.000   |
|      |             | Shft/esd:             | 0.05   |       |       |       |        |         |
| FE4  | moved 0.00A | sum(shift/e.s.d)**2 : |        |       | 1.11  |       |        |         |

1SF0  
Page 11

GENLES Version Win32 Jun 24 14:07:26 2011

|      |      |           |       |          |          |          |       |  |
|------|------|-----------|-------|----------|----------|----------|-------|--|
| FE+3 | ( 5) | Values :  | 0.460 | 0.666670 | 0.333330 | 0.091220 | 0.548 |  |
|      |      | Sigmas :  |       |          |          |          | 0.036 |  |
|      |      | Shft/esd: |       |          |          |          | 1.05  |  |

|      |             |                       |        |       |       |       |        |         |
|------|-------------|-----------------------|--------|-------|-------|-------|--------|---------|
| FE+3 | ( 5)        | Moments :             | -2.669 | 0.000 | 0.000 | 2.669 | 90.000 | 180.000 |
|      |             | Sigmas :              | 0.043  |       |       | 0.043 | 0.000  | 0.000   |
|      |             | Shft/esd:             | 0.05   |       |       |       |        |         |
| FE5  | moved 0.00A | sum(shift/e.s.d)**2 : |        |       | 1.11  |       |        |         |

|      |      |           |       |          |          |          |       |  |
|------|------|-----------|-------|----------|----------|----------|-------|--|
| FE+3 | ( 6) | Values :  | 0.460 | 0.333330 | 0.666670 | 0.424560 | 0.548 |  |
|      |      | Sigmas :  |       |          |          |          | 0.036 |  |
|      |      | Shft/esd: |       |          |          |          | 1.05  |  |

|      |             |                       |        |       |       |       |        |         |
|------|-------------|-----------------------|--------|-------|-------|-------|--------|---------|
| FE+3 | ( 6)        | Moments :             | -2.669 | 0.000 | 0.000 | 2.669 | 90.000 | 180.000 |
|      |             | Sigmas :              | 0.043  |       |       | 0.043 | 0.000  | 0.000   |
|      |             | Shft/esd:             | 0.05   |       |       |       |        |         |
| FE6  | moved 0.00A | sum(shift/e.s.d)**2 : |        |       | 1.11  |       |        |         |

|      |      |           |       |          |          |          |       |  |
|------|------|-----------|-------|----------|----------|----------|-------|--|
| FE+3 | ( 7) | Values :  | 0.540 | 0.000000 | 0.000000 | 0.047674 | 0.347 |  |
|      |      | Sigmas :  |       |          |          | 0.000050 | 0.033 |  |
|      |      | Shft/esd: |       |          |          | -0.25    | -0.94 |  |

|      |             |                       |        |       |       |       |        |         |
|------|-------------|-----------------------|--------|-------|-------|-------|--------|---------|
| FE+3 | ( 7)        | Moments :             | -2.669 | 0.000 | 0.000 | 2.669 | 90.000 | 180.000 |
|      |             | Sigmas :              | 0.043  |       |       | 0.043 | 0.000  | 0.000   |
|      |             | Shft/esd:             | 0.05   |       |       |       |        |         |
| FE7  | moved 0.00A | sum(shift/e.s.d)**2 : |        |       | 0.96  |       |        |         |

|      |      |           |       |          |          |          |       |  |
|------|------|-----------|-------|----------|----------|----------|-------|--|
| FE+3 | ( 8) | Values :  | 0.540 | 0.666670 | 0.333330 | 0.381004 | 0.347 |  |
|      |      | Sigmas :  |       |          |          | 0.000050 | 0.033 |  |
|      |      | Shft/esd: |       |          |          | -0.25    | -0.94 |  |

|      |             |                       |        |       |       |       |        |         |
|------|-------------|-----------------------|--------|-------|-------|-------|--------|---------|
| FE+3 | ( 8)        | Moments :             | -2.669 | 0.000 | 0.000 | 2.669 | 90.000 | 180.000 |
|      |             | Sigmas :              | 0.043  |       |       | 0.043 | 0.000  | 0.000   |
|      |             | Shft/esd:             | 0.05   |       |       |       |        |         |
| FE8  | moved 0.00A | sum(shift/e.s.d)**2 : |        |       | 0.96  |       |        |         |

|      |      |           |       |          |          |          |       |  |
|------|------|-----------|-------|----------|----------|----------|-------|--|
| FE+3 | ( 9) | Values :  | 0.540 | 0.333330 | 0.666670 | 0.714345 | 0.347 |  |
|      |      | Sigmas :  |       |          |          | 0.000050 | 0.033 |  |
|      |      | Shft/esd: |       |          |          | -0.25    | -0.94 |  |

|      |             |                       |        |       |       |       |        |         |
|------|-------------|-----------------------|--------|-------|-------|-------|--------|---------|
| FE+3 | ( 9)        | Moments :             | -2.669 | 0.000 | 0.000 | 2.669 | 90.000 | 180.000 |
|      |             | Sigmas :              | 0.043  |       |       | 0.043 | 0.000  | 0.000   |
|      |             | Shft/esd:             | 0.05   |       |       |       |        |         |
| FE9  | moved 0.00A | sum(shift/e.s.d)**2 : |        |       | 0.96  |       |        |         |

1SF0  
Page 12

GENLES Version Win32 Jun 24 14:07:26 2011

|      |       |           |       |          |          |          |       |  |
|------|-------|-----------|-------|----------|----------|----------|-------|--|
| FE+3 | ( 10) | Values :  | 0.540 | 0.000000 | 0.000000 | 0.547675 | 0.347 |  |
|      |       | Sigmas :  |       |          |          | 0.000050 | 0.033 |  |
|      |       | Shft/esd: |       |          |          | -0.25    | -0.94 |  |

|      |             |                       |       |       |       |       |        |       |
|------|-------------|-----------------------|-------|-------|-------|-------|--------|-------|
| FE+3 | ( 10)       | Moments :             | 2.669 | 0.000 | 0.000 | 2.669 | 90.000 | 0.000 |
|      |             | Sigmas :              | 0.043 |       |       | 0.043 | 0.000  | 0.000 |
|      |             | Shft/esd:             | -0.05 |       |       |       |        |       |
| FE10 | moved 0.00A | sum(shift/e.s.d)**2 : |       |       | 0.96  |       |        |       |

|      |       |           |       |          |          |          |       |  |
|------|-------|-----------|-------|----------|----------|----------|-------|--|
| FE+3 | ( 11) | Values :  | 0.540 | 0.666670 | 0.333330 | 0.881005 | 0.347 |  |
|      |       | Sigmas :  |       |          |          | 0.000050 | 0.033 |  |
|      |       | Shft/esd: |       |          |          | -0.25    | -0.94 |  |

|      |             |                       |       |       |       |       |        |       |
|------|-------------|-----------------------|-------|-------|-------|-------|--------|-------|
| FE+3 | ( 11)       | Moments :             | 2.669 | 0.000 | 0.000 | 2.669 | 90.000 | 0.000 |
|      |             | Sigmas :              | 0.043 |       |       | 0.043 | 0.000  | 0.000 |
|      |             | Shft/esd:             | -0.05 |       |       |       |        |       |
| FE11 | moved 0.00A | sum(shift/e.s.d)**2 : |       |       | 0.96  |       |        |       |

|      |       |          |       |          |          |          |       |  |
|------|-------|----------|-------|----------|----------|----------|-------|--|
| FE+3 | ( 12) | Values : | 0.540 | 0.333330 | 0.666670 | 0.214345 | 0.347 |  |
|------|-------|----------|-------|----------|----------|----------|-------|--|





0.000E+00  
 Sigmas :  
 Shift/esd:  
 Coeff. : L23  
 Value : 0.000E+00  
 Sigmas :  
 Shift/esd:  
 Profile coef. sum(shift/error)\*\*2 : 0.17

Background coefficients for histogram no. 1:  
 Param. : 1 2 3 4 5 6  
 Coeff. : 3.303978E-01 -1.781840E-02 5.272586E-02 -1.853620E-02 -9.874714E-03 -3.959066E-02  
 Sigmas : 4.614085E-03 8.662024E-03 7.904008E-03 7.311982E-03 6.852584E-03 6.160843E-03  
 Shift/esd: -0.14 -0.15 -0.14 -0.16 -0.14 -0.13  
 Param. : 7 8 9  
 Coeff. : -1.858330E-02 -1.533384E-02 -7.153702E-03  
 Sigmas : 5.221982E-03 3.640774E-03 1.897049E-03  
 Shift/esd: -0.13 -0.11 -0.10

GENLES Version Win32 Jun 24 14:07:26 2011

1SF0  
 Page 15

Background coefficients for histogram no. 2:  
 Param. : 1 2 3 4 5 6  
 Coeff. : 2.736499E-01 -9.806749E-02 9.463286E-03 -1.771650E-02 1.122380E-02 -8.165664E-03  
 Sigmas : 2.500222E-03 4.625665E-03 4.215699E-03 3.986135E-03 3.837732E-03 3.727080E-03  
 Shift/esd: -0.13 -0.14 -0.05 -0.05 0.00 -0.02  
 Param. : 7 8 9 10 11 12  
 Coeff. : 1.238967E-04 -1.504364E-02 -7.065465E-03 1.783769E-03 3.499292E-03 -1.700513E-02  
 Sigmas : 3.603243E-03 3.500275E-03 3.258536E-03 2.870727E-03 2.146273E-03 1.151718E-03  
 Shift/esd: -0.05 -0.14 -0.18 -0.21 -0.21 -0.24  
 Background coef. sum(shift/error)\*\*2 : 0.34

CPU times for matrix build 1.55 sec; matrix inversion 0.00 sec  
 Final variable sum((shift/esd)\*\*2) for cycle1157: 3.60 Time: 1.55 sec

GENLES Version Win32 Jun 24 14:07:26 2011

1SF0  
 Page 16

Restraint data statistics:  
 No restraints used

| Powder data statistics |            | Fitted       |        | -Bknd  |        | pFree  |        | Average |        |       |          |
|------------------------|------------|--------------|--------|--------|--------|--------|--------|---------|--------|-------|----------|
|                        | Bank Ndata | Sum(w*d**2)  | wRp    | Rp     | wRp    | Rp     | wRp    | Rp      | Npfree | DWd   | Integral |
| Hstgm 1                | PNT 1      | 4524 4592.7  | 0.0694 | 0.1159 | 3.0071 | 0.6136 | 0.0000 | 0.0000  | 0      | 0.658 | 0.982    |
| Hstgm 2                | PNT 2      | 3753 4940.6  | 0.0449 | 0.0945 | 0.1091 | 0.1136 | 0.0000 | 0.0000  | 0      | 0.462 | 0.990    |
| Hstgm 3                | PNT 3      | 4808 4303.4  | 0.1278 | 0.1742 | 3.2083 | 0.7146 | 0.0000 | 0.0000  | 0      | 0.732 | 0.997    |
| Powder totals          |            | 13085 13837. | 0.0614 | 0.1237 | 1.9001 | 0.4462 | 0.0000 | 0.0000  | 0      | 0.611 |          |

No serial correlation in fit at 90% confidence for 1.952 < DWd < 2.048  
 Cycle1158 There were 13085 observations.  
 Total before-cycle CHI\*\*2 (offset/sig) = 1.3837E+04 ( 4.9211E+00)  
 Reduced CHI\*\*2 = 1.061 for 43 variables

Reflection data statistics  
 Histogram 1 Type PNT Nobs = 1302 R(F\*\*2) = 0.1149  
 Histogram 2 Type PNT Nobs = 1071 R(F\*\*2) = 0.0983  
 Histogram 3 Type PNT Nobs = 857 R(F\*\*2) = 0.0804  
 After matrix normalization and Marquardt modification:

1 Columns of the 43 Column matrix are 0.0  
 Full matrix recip. condition value & -log10 = 0.2033E-03 3.69  
 Variable NoVarabl was not refined

The value of the determinant is 1.3370\*10.0\*\*( -22)

Atom parameters for phase no. 1

|                  | frac    | x        | y                     | z        | 100*Uiso | 100*U11 | 100*U22 | 100*U33 | 100*U12 | 100*U13 |
|------------------|---------|----------|-----------------------|----------|----------|---------|---------|---------|---------|---------|
| 100*U23          |         |          |                       |          |          |         |         |         |         |         |
| SC+3 ( 1) Values | : 0.460 | 0.000000 | 0.000000              | 0.047682 | 0.370    |         |         |         |         |         |
| Sigmas           | :       |          |                       | 0.000050 | 0.031    |         |         |         |         |         |
| Shift/esd:       |         |          |                       | 0.17     | 0.76     |         |         |         |         |         |
| Sc1 moved 0.00A  |         |          | sum(shift/e.s.d)**2 : | 0.61     |          |         |         |         |         |         |
| FE+3 ( 2) Values | : 0.460 | 0.000000 | 0.000000              | 0.257903 | 0.521    |         |         |         |         |         |
| Sigmas           | :       |          |                       |          | 0.035    |         |         |         |         |         |



Shft/esd: -0.74  
 Fe1 moved 0.00A sum(shift/e.s.d)\*\*2 : 0.55  
 0 ( 3) Values : 1.000 0.342333 -0.026070 0.817557 0.485  
           Sigmas : 0.000390 0.000228 0.000227 0.010  
           Shft/esd: 0.03 0.02 -0.18 -0.12  
 01 moved 0.00A sum(shift/e.s.d)\*\*2 : 0.05  
 FE+3 ( 4) Values : 0.540 0.000000 0.000000 0.047682 0.370  
           Sigmas : 0.000050 0.031  
           Shft/esd: 0.17 0.76  
 Fe2 moved 0.00A sum(shift/e.s.d)\*\*2 : 0.61

1SF0  
Page 17

GENLES Version Win32 Jun 24 14:07:28 2011

SC+3 ( 5) Values : 0.540 0.000000 0.000000 0.257903 0.521  
           Sigmas : 0.035  
           Shft/esd: -0.74  
 Sc2 moved 0.00A sum(shift/e.s.d)\*\*2 : 0.55

Maximum atom shift: 0.00  
 Atomic parameter sum(shift/error)\*\*2 for phase 1 : 2.38  
 Calculated unit cell formula weight: 892.800, density: 4.513gm/cm\*\*3

Atom parameters for phase no. 2

|           | frac        | x       | y                     | z        | 100*Uiso | 100*U11 | 100*U22 | 100*U33 | 100*U12 | 100*U13 |
|-----------|-------------|---------|-----------------------|----------|----------|---------|---------|---------|---------|---------|
| 100*U23   |             |         |                       |          |          |         |         |         |         |         |
|           |             | Mx      | My                    | Mz       | Moment   | Theta   | Psi     |         |         |         |
| FE+3 ( 1) | Values      | : 0.460 | 0.000000              | 0.000000 | 0.257890 | 0.521   |         |         |         |         |
|           | Sigmas      | :       |                       |          |          | 0.035   |         |         |         |         |
|           | Shft/esd:   |         |                       |          |          | -0.74   |         |         |         |         |
| FE+3 ( 1) | Moments     | :       | 2.670                 | 0.000    | 0.000    | 2.670   | 90.000  | 0.000   |         |         |
|           | Sigmas      | :       | 0.043                 |          |          | 0.043   | 0.000   | 0.000   |         |         |
|           | Shft/esd:   |         | 0.01                  |          |          |         |         |         |         |         |
| FE1       | moved 0.00A |         | sum(shift/e.s.d)**2 : | 0.55     |          |         |         |         |         |         |
| FE+3 ( 2) | Values      | : 0.460 | 0.666670              | 0.333330 | 0.591220 | 0.521   |         |         |         |         |
|           | Sigmas      | :       |                       |          |          | 0.035   |         |         |         |         |
|           | Shft/esd:   |         |                       |          |          | -0.74   |         |         |         |         |
| FE+3 ( 2) | Moments     | :       | 2.670                 | 0.000    | 0.000    | 2.670   | 90.000  | 0.000   |         |         |
|           | Sigmas      | :       | 0.043                 |          |          | 0.043   | 0.000   | 0.000   |         |         |
|           | Shft/esd:   |         | 0.01                  |          |          |         |         |         |         |         |
| FE2       | moved 0.00A |         | sum(shift/e.s.d)**2 : | 0.55     |          |         |         |         |         |         |
| FE+3 ( 3) | Values      | : 0.460 | 0.333330              | 0.666670 | 0.924560 | 0.521   |         |         |         |         |
|           | Sigmas      | :       |                       |          |          | 0.035   |         |         |         |         |
|           | Shft/esd:   |         |                       |          |          | -0.74   |         |         |         |         |
| FE+3 ( 3) | Moments     | :       | 2.670                 | 0.000    | 0.000    | 2.670   | 90.000  | 0.000   |         |         |
|           | Sigmas      | :       | 0.043                 |          |          | 0.043   | 0.000   | 0.000   |         |         |
|           | Shft/esd:   |         | 0.01                  |          |          |         |         |         |         |         |
| FE3       | moved 0.00A |         | sum(shift/e.s.d)**2 : | 0.55     |          |         |         |         |         |         |
| FE+3 ( 4) | Values      | : 0.460 | 0.000000              | 0.000000 | 0.757890 | 0.521   |         |         |         |         |
|           | Sigmas      | :       |                       |          |          | 0.035   |         |         |         |         |
|           | Shft/esd:   |         |                       |          |          | -0.74   |         |         |         |         |
| FE+3 ( 4) | Moments     | :       | -2.670                | 0.000    | 0.000    | 2.670   | 90.000  | 180.000 |         |         |
|           | Sigmas      | :       | 0.043                 |          |          | 0.043   | 0.000   | 0.000   |         |         |
|           | Shft/esd:   |         | -0.01                 |          |          |         |         |         |         |         |
| FE4       | moved 0.00A |         | sum(shift/e.s.d)**2 : | 0.55     |          |         |         |         |         |         |

1SF0  
Page 18

GENLES Version Win32 Jun 24 14:07:28 2011

FE+3 ( 5) Values : 0.460 0.666670 0.333330 0.091220 0.521  
           Sigmas : 0.035  
           Shft/esd: -0.74  
 FE+3 ( 5) Moments : -2.670 0.000 0.000 2.670 90.000 180.000  
           Sigmas : 0.043 0.043 0.000 0.000  
           Shft/esd: -0.01  
 FE5 moved 0.00A sum(shift/e.s.d)\*\*2 : 0.55

|      |             |                       |        |          |          |          |        |         |  |
|------|-------------|-----------------------|--------|----------|----------|----------|--------|---------|--|
| FE+3 | ( 6)        | Values :              | 0.460  | 0.333330 | 0.666670 | 0.424560 | 0.521  |         |  |
|      |             | Sigmas :              |        |          |          |          | 0.035  |         |  |
|      |             | Shft/esd:             |        |          |          |          | -0.74  |         |  |
| FE+3 | ( 6)        | Moments :             | -2.670 | 0.000    | 0.000    | 2.670    | 90.000 | 180.000 |  |
|      |             | Sigmas :              | 0.043  |          |          | 0.043    | 0.000  | 0.000   |  |
|      |             | Shft/esd:             | -0.01  |          |          |          |        |         |  |
| FE6  | moved 0.00A | sum(shift/e.s.d)**2 : |        |          | 0.55     |          |        |         |  |
| FE+3 | ( 7)        | Values :              | 0.540  | 0.000000 | 0.000000 | 0.047682 | 0.370  |         |  |
|      |             | Sigmas :              |        |          |          | 0.000050 | 0.031  |         |  |
|      |             | Shft/esd:             |        |          |          | 0.17     | 0.76   |         |  |
| FE+3 | ( 7)        | Moments :             | -2.670 | 0.000    | 0.000    | 2.670    | 90.000 | 180.000 |  |
|      |             | Sigmas :              | 0.043  |          |          | 0.043    | 0.000  | 0.000   |  |
|      |             | Shft/esd:             | -0.01  |          |          |          |        |         |  |
| FE7  | moved 0.00A | sum(shift/e.s.d)**2 : |        |          | 0.61     |          |        |         |  |
| FE+3 | ( 8)        | Values :              | 0.540  | 0.666670 | 0.333330 | 0.381012 | 0.370  |         |  |
|      |             | Sigmas :              |        |          |          | 0.000050 | 0.031  |         |  |
|      |             | Shft/esd:             |        |          |          | 0.17     | 0.76   |         |  |
| FE+3 | ( 8)        | Moments :             | -2.670 | 0.000    | 0.000    | 2.670    | 90.000 | 180.000 |  |
|      |             | Sigmas :              | 0.043  |          |          | 0.043    | 0.000  | 0.000   |  |
|      |             | Shft/esd:             | -0.01  |          |          |          |        |         |  |
| FE8  | moved 0.00A | sum(shift/e.s.d)**2 : |        |          | 0.61     |          |        |         |  |
| FE+3 | ( 9)        | Values :              | 0.540  | 0.333330 | 0.666670 | 0.714353 | 0.370  |         |  |
|      |             | Sigmas :              |        |          |          | 0.000050 | 0.031  |         |  |
|      |             | Shft/esd:             |        |          |          | 0.17     | 0.76   |         |  |
| FE+3 | ( 9)        | Moments :             | -2.670 | 0.000    | 0.000    | 2.670    | 90.000 | 180.000 |  |
|      |             | Sigmas :              | 0.043  |          |          | 0.043    | 0.000  | 0.000   |  |
|      |             | Shft/esd:             | -0.01  |          |          |          |        |         |  |
| FE9  | moved 0.00A | sum(shift/e.s.d)**2 : |        |          | 0.61     |          |        |         |  |

1SF0  
Page 19

GENLES Version Win32 Jun 24 14:07:28 2011

|      |             |                       |       |          |          |          |        |       |  |
|------|-------------|-----------------------|-------|----------|----------|----------|--------|-------|--|
| FE+3 | ( 10)       | Values :              | 0.540 | 0.000000 | 0.000000 | 0.547683 | 0.370  |       |  |
|      |             | Sigmas :              |       |          |          | 0.000050 | 0.031  |       |  |
|      |             | Shft/esd:             |       |          |          | 0.17     | 0.76   |       |  |
| FE+3 | ( 10)       | Moments :             | 2.670 | 0.000    | 0.000    | 2.670    | 90.000 | 0.000 |  |
|      |             | Sigmas :              | 0.043 |          |          | 0.043    | 0.000  | 0.000 |  |
|      |             | Shft/esd:             | 0.01  |          |          |          |        |       |  |
| FE10 | moved 0.00A | sum(shift/e.s.d)**2 : |       |          | 0.61     |          |        |       |  |
| FE+3 | ( 11)       | Values :              | 0.540 | 0.666670 | 0.333330 | 0.881013 | 0.370  |       |  |
|      |             | Sigmas :              |       |          |          | 0.000050 | 0.031  |       |  |
|      |             | Shft/esd:             |       |          |          | 0.17     | 0.76   |       |  |
| FE+3 | ( 11)       | Moments :             | 2.670 | 0.000    | 0.000    | 2.670    | 90.000 | 0.000 |  |
|      |             | Sigmas :              | 0.043 |          |          | 0.043    | 0.000  | 0.000 |  |
|      |             | Shft/esd:             | 0.01  |          |          |          |        |       |  |
| FE11 | moved 0.00A | sum(shift/e.s.d)**2 : |       |          | 0.61     |          |        |       |  |
| FE+3 | ( 12)       | Values :              | 0.540 | 0.333330 | 0.666670 | 0.214353 | 0.370  |       |  |
|      |             | Sigmas :              |       |          |          | 0.000050 | 0.031  |       |  |
|      |             | Shft/esd:             |       |          |          | 0.17     | 0.76   |       |  |
| FE+3 | ( 12)       | Moments :             | 2.670 | 0.000    | 0.000    | 2.670    | 90.000 | 0.000 |  |
|      |             | Sigmas :              | 0.043 |          |          | 0.043    | 0.000  | 0.000 |  |
|      |             | Shft/esd:             | 0.01  |          |          |          |        |       |  |
| FE12 | moved 0.00A | sum(shift/e.s.d)**2 : |       |          | 0.61     |          |        |       |  |

Maximum atom shift: 0.00

Atomic parameter sum(shift/error)\*\*2 for phase 2 : 7.00

Calculated unit cell formula weight: 335.082, density: 1.694gm/cm\*\*3

Histogram scale factors:

|            |              |              |              |         |         |
|------------|--------------|--------------|--------------|---------|---------|
| Histogram: | 1 PNT        | 2 PNT        | 3 PNT        | 4 PNT*  | 5 PXC*  |
| Scale :    | 8.77103      | 8.77826      | 10.0709      | 0.00000 | 0.00000 |
| Sigmas :   | 0.332558E-01 | 0.301481E-01 | 0.363082E-01 | 0.00000 | 0.00000 |

Shift/esd: -0.08 -0.11 -0.06 0.00 0.00  
Histogram scale factor sum(shift/error)\*\*2 : 0.02

Lattice parameters for powder data:

Phase 1  
a b c alpha beta gamma volume  
Value : 5.202475 5.202475 14.014487 90.000 90.000 120.000 328.494  
Sigmas : 0.000004 0.000004 0.000113 0.000 0.000 0.000 0.003

Reciprocal metric tensor shift factor = 100%

Phase 2  
a b c alpha beta gamma volume  
Value : 5.202432 5.202446 14.014498 90.000 90.000 119.999 328.494  
Sigmas : 0.000007 0.000007 0.000113 0.000 0.000 0.000 0.003

Reciprocal metric tensor shift factor = 100%

Reciprocal metric tensor sum(shift/error)\*\*2 : 0.00

LSFO

GENLES Version Win32 Jun 24 14:07:28 2011

Page 20

Diffraction coefficients for powder data:

Histogram : 1 PNT 2 PNT 3 PNT 4 PNT\* 5 PXC\*  
C/L1/R/2Th: 4569.20 6162.13 2139.59 0.00000 0.00000  
Sigmas : 0.105493 0.00000 0.153615 0.00000 0.00000  
Shift/esd : 0.00 0.00 0.00 0.00 0.00  
Dif A/Pol: -0.969864 -2.51000 1.29554 0.00000 0.00000  
Sigmas : 0.627692E-01 0.00000 0.698659E-01 0.00000 0.00000  
Shift/esd : 0.00 0.00 0.00 0.00 0.00  
Zero : 1.90000 3.85000 9.03000 0.00000 0.00000  
Sigmas : 0.00000 0.00000 0.00000 0.00000 0.00000  
Shift/esd : 0.00 0.00 0.00 0.00 0.00  
Dif. Cons. Sum(shift/error)\*\*2 : 0.00

Profile coefficients for histogram no. 1 and for phase no. 1:

Coeff. : alp be-0 be-1 sg-0 sg-1 sg-2 ga-0 ga-1 ga-2  
gsf  
Value : 2.898E-01 5.288E-02 7.468E-03 0.000E+00 2.460E+01 2.080E+00 0.000E+00 3.151E+00 0.000E+00  
0.000E+00  
Sigmas : 8.512E-01 1.560E-01  
Shift/esd: 0.01 -0.01  
Coeff. : g1ec g2ec rstr rsta rsca L11 L22 L33 L12  
L13  
Value : 0.000E+00 0.000E+00 0.000E+00 0.000E+00 0.000E+00 0.000E+00 0.000E+00 0.000E+00 0.000E+00  
0.000E+00  
Sigmas :  
Shift/esd:  
Coeff. : L23  
Value : 0.000E+00  
Sigmas :  
Shift/esd:

Profile coefficients for histogram no. 2 and for phase no. 1:

Coeff. : alp be-0 be-1 sg-0 sg-1 sg-2 ga-0 ga-1 ga-2  
gsf  
Value : 4.108E+00 6.789E-02 2.857E-03 3.543E+00 4.379E+01 -1.859E+00 0.000E+00 4.539E-02 1.628E+00  
0.000E+00  
Sigmas : 7.581E-01 1.182E-01  
Shift/esd: 0.01 -0.01  
Coeff. : g1ec g2ec rstr rsta rsca L11 L22 L33 L12  
L13  
Value : 0.000E+00 0.000E+00 0.000E+00 0.000E+00 0.000E+00 0.000E+00 0.000E+00 0.000E+00 0.000E+00  
0.000E+00  
Sigmas :  
Shift/esd:  
Coeff. : L23  
Value : 0.000E+00  
Sigmas :  
Shift/esd:

Profile coefficients for histogram no. 3 and for phase no. 1:

Coeff. : alp be-0 be-1 sg-0 sg-1 sg-2 ga-0 ga-1 ga-2  
gsf  
Value : 1.000E+00 5.279E-02 2.026E-01 2.192E+01 7.865E+01 1.284E+00 0.000E+00 0.000E+00 0.000E+00  
0.000E+00  
Sigmas : 8.469E-01  
Shift/esd: 0.00  
Coeff. : g1ec g2ec rstr rsta rsca L11 L22 L33 L12

L13  
Value : 0.000E+00 0.000E+00 0.000E+00 0.000E+00 0.000E+00 0.000E+00 0.000E+00 0.000E+00 0.000E+00  
0.000E+00

Sigmas :  
Shift/esd:  
Coeff. : L23  
Value : 0.000E+00  
Sigmas :  
Shift/esd:

1SF0  
Page 21

GENLES Version Win32 Jun 24 14:07:28 2011

Profile coefficients for histogram no. 1 and for phase no. 2:  
Coeff. : alp be-0 be-1 sg-0 sg-1 sg-2 ga-0 ga-1 ga-2  
gsf  
Value : 2.898E-01 5.288E-02 7.468E-03 0.000E+00 2.460E+01 2.080E+00 0.000E+00 3.151E+00 0.000E+00  
0.000E+00  
Sigmas : 8.512E-01 1.560E-01  
Shift/esd: 0.01 -0.01  
Coeff. : g1ec g2ec rstr rsta rsca L11 L22 L33 L12

L13  
Value : 0.000E+00 0.000E+00 0.000E+00 0.000E+00 0.000E+00 0.000E+00 0.000E+00 0.000E+00 0.000E+00  
0.000E+00  
Sigmas :  
Shift/esd:  
Coeff. : L23  
Value : 0.000E+00  
Sigmas :  
Shift/esd:

Profile coefficients for histogram no. 2 and for phase no. 2:  
Coeff. : alp be-0 be-1 sg-0 sg-1 sg-2 ga-0 ga-1 ga-2  
gsf  
Value : 4.108E+00 6.789E-02 2.857E-03 3.543E+00 4.379E+01 -1.859E+00 0.000E+00 4.539E-02 1.628E+00  
0.000E+00  
Sigmas : 7.581E-01 1.182E-01  
Shift/esd: 0.01 -0.01  
Coeff. : g1ec g2ec rstr rsta rsca L11 L22 L33 L12

L13  
Value : 0.000E+00 0.000E+00 0.000E+00 0.000E+00 0.000E+00 0.000E+00 0.000E+00 0.000E+00 0.000E+00  
0.000E+00  
Sigmas :  
Shift/esd:  
Coeff. : L23  
Value : 0.000E+00  
Sigmas :  
Shift/esd:

Profile coefficients for histogram no. 3 and for phase no. 2:  
Coeff. : alp be-0 be-1 sg-0 sg-1 sg-2 ga-0 ga-1 ga-2  
gsf  
Value : 1.000E+00 5.279E-02 2.026E-01 2.192E+01 7.865E+01 1.284E+00 0.000E+00 0.000E+00 0.000E+00  
0.000E+00  
Sigmas : 8.469E-01  
Shift/esd: 0.00  
Coeff. : g1ec g2ec rstr rsta rsca L11 L22 L33 L12

L13  
Value : 0.000E+00 0.000E+00 0.000E+00 0.000E+00 0.000E+00 0.000E+00 0.000E+00 0.000E+00 0.000E+00  
0.000E+00  
Sigmas :  
Shift/esd:  
Coeff. : L23  
Value : 0.000E+00  
Sigmas :  
Shift/esd:  
Profile coef. sum(shift/error)\*\*2 : 0.00

Background coefficients for histogram no. 1:  
Param. : 1 2 3 4 5 6  
Coeff. : 3.304273E-01 -1.784530E-02 5.279630E-02 -1.856671E-02 -9.806596E-03 -3.960142E-02  
Sigmas : 4.614073E-03 8.661762E-03 7.904069E-03 7.311771E-03 6.852678E-03 6.160627E-03  
Shift/esd: 0.01 0.00 0.01 0.00 0.01 0.00  
Param. : 7 8 9  
Coeff. : -1.851426E-02 -1.532087E-02 -7.128948E-03  
Sigmas : 5.222123E-03 3.640635E-03 1.897181E-03

Shift/esd: 0.01 0.00 0.01  
1SF0  
Page 22

GENLES Version Win32 Jun 24 14:07:28 2011

Background coefficients for histogram no. 2:

| Param.                                 | 1            | 2             | 3             | 4             | 5            | 6             |
|----------------------------------------|--------------|---------------|---------------|---------------|--------------|---------------|
| Coeff.                                 | 2.736696E-01 | -9.806543E-02 | 9.508059E-03  | -1.771441E-02 | 1.125797E-02 | -8.162072E-03 |
| Sigmas                                 | 2.500357E-03 | 4.625536E-03  | 4.215916E-03  | 3.985978E-03  | 3.837809E-03 | 3.726864E-03  |
| Shift/esd:                             | 0.01         | 0.00          | 0.01          | 0.00          | 0.01         | 0.00          |
| Param.                                 | 7            | 8             | 9             | 10            | 11           | 12            |
| Coeff.                                 | 1.522888E-04 | -1.499535E-02 | -7.019843E-03 | 1.833594E-03  | 3.546810E-03 | -1.694909E-02 |
| Sigmas                                 | 3.603216E-03 | 3.500137E-03  | 3.258566E-03  | 2.870752E-03  | 2.146390E-03 | 1.152073E-03  |
| Shift/esd:                             | 0.01         | 0.01          | 0.01          | 0.02          | 0.02         | 0.05          |
| Background coef. sum(shift/error)**2 : | 0.00         |               |               |               |              |               |

CPU times for matrix build 1.73 sec; matrix inversion 0.00 sec  
Final variable sum((shift/esd)\*\*2) for cycle1158: 1.24 Time: 1.73 sec

1SF0

GENLES Version Win32 Jun 24 14:07:28 2011

Page 23

Restraint data statistics:  
No restraints used

| Powder data statistics |      |       | Fitted      |        | -Bknd  |        | pFree  |        | Average |        |     |          |       |
|------------------------|------|-------|-------------|--------|--------|--------|--------|--------|---------|--------|-----|----------|-------|
|                        | Bank | Ndata | Sum(w*d**2) | wRp    | Rp     | wRp    | Rp     | wRp    | Rp      | Npfree | DWd | Integral |       |
| Hstgm 1                | PNT  | 1     | 4524        | 4593.1 | 0.0694 | 0.1159 | 3.0076 | 0.6137 | 0.0000  | 0.0000 | 0   | 0.658    | 0.982 |
| Hstgm 2                | PNT  | 2     | 3753        | 4940.9 | 0.0449 | 0.0945 | 0.1091 | 0.1134 | 0.0000  | 0.0000 | 0   | 0.462    | 0.990 |
| Hstgm 3                | PNT  | 3     | 4808        | 4302.7 | 0.1278 | 0.1742 | 3.2083 | 0.7146 | 0.0000  | 0.0000 | 0   | 0.733    | 0.997 |
| Powder totals          |      | 13085 | 13837.      |        | 0.0614 | 0.1236 | 1.9004 | 0.4462 | 0.0000  | 0.0000 | 0   | 0.611    |       |

No serial correlation in fit at 90% confidence for 1.952 < DWd < 2.048

Cycle1159 There were 13085 observations.

Total before-cycle CHI\*\*2 (offset/sig) = 1.3837E+04 ( 4.9204E+00)

Reduced CHI\*\*2 = 1.061 for 43 variables

Reflection data statistics

Histogram 1 Type PNT Nobs = 1302 R(F\*\*2) = 0.1149

Histogram 2 Type PNT Nobs = 1071 R(F\*\*2) = 0.0982

Histogram 3 Type PNT Nobs = 857 R(F\*\*2) = 0.0805

After matrix normalization and Marquardt modification:

1 Columns of the 43 Column matrix are 0.0

Full matrix recip. condition value & -log10 = 0.2037E-03 3.69

Variable NoVarabl was not refined

The value of the determinant is 1.2670\*10.0\*\*( -22)

Atom parameters for phase no. 1

|           | frac        | x       | y                     | z         | 100*Uiso | 100*U11 | 100*U22 | 100*U33 | 100*U12 | 100*U13 |
|-----------|-------------|---------|-----------------------|-----------|----------|---------|---------|---------|---------|---------|
| 100*U23   |             |         |                       |           |          |         |         |         |         |         |
| SC+3 ( 1) | Values      | : 0.460 | 0.000000              | 0.000000  | 0.047676 | 0.354   |         |         |         |         |
|           | Sigmas      | :       |                       |           | 0.000050 | 0.032   |         |         |         |         |
|           | Shift/esd:  |         |                       |           | -0.11    | -0.52   |         |         |         |         |
| Sc1       | moved 0.00A |         | sum(shift/e.s.d)**2 : | 0.28      |          |         |         |         |         |         |
| FE+3 ( 2) | Values      | : 0.460 | 0.000000              | 0.000000  | 0.257903 | 0.540   |         |         |         |         |
|           | Sigmas      | :       |                       |           |          | 0.036   |         |         |         |         |
|           | Shift/esd:  |         |                       |           |          | 0.53    |         |         |         |         |
| Fe1       | moved 0.00A |         | sum(shift/e.s.d)**2 : | 0.28      |          |         |         |         |         |         |
| 0 ( 3)    | Values      | : 1.000 | 0.342323              | -0.026074 | 0.817590 | 0.486   |         |         |         |         |
|           | Sigmas      | :       | 0.000388              | 0.000227  | 0.000226 | 0.010   |         |         |         |         |
|           | Shift/esd:  |         | -0.03                 | -0.02     | 0.15     | 0.10    |         |         |         |         |
| 01        | moved 0.00A |         | sum(shift/e.s.d)**2 : | 0.03      |          |         |         |         |         |         |
| FE+3 ( 4) | Values      | : 0.540 | 0.000000              | 0.000000  | 0.047676 | 0.354   |         |         |         |         |
|           | Sigmas      | :       |                       |           | 0.000050 | 0.032   |         |         |         |         |
|           | Shift/esd:  |         |                       |           | -0.11    | -0.52   |         |         |         |         |
| Fe2       | moved 0.00A |         | sum(shift/e.s.d)**2 : | 0.28      |          |         |         |         |         |         |

1SF0

GENLES Version Win32 Jun 24 14:07:30 2011

Page 24

SC+3 ( 5) Values : 0.540 0.000000 0.000000 0.257903 0.540

Sigmas : 0.036  
 Shft/esd: 0.53  
 Sc2 moved 0.00A sum(shift/e.s.d)\*\*2 : 0.28

Maximum atom shift: 0.00  
 Atomic parameter sum(shift/error)\*\*2 for phase 1 : 1.16  
 Calculated unit cell formula weight: 892.800, density: 4.513gm/cm\*\*3

Atom parameters for phase no. 2

|                     | frac  | x        | y        | z        | 100*Uiso | 100*U11 | 100*U22 | 100*U33 | 100*U12 | 100*U13 |
|---------------------|-------|----------|----------|----------|----------|---------|---------|---------|---------|---------|
| 100*U23             |       |          |          |          |          |         |         |         |         |         |
|                     |       | Mx       | My       | Mz       | IMomentI | Theta   | Psi     |         |         |         |
| FE+3 ( 1) Values :  | 0.460 | 0.000000 | 0.000000 | 0.257890 | 0.540    |         |         |         |         |         |
| Sigmas :            |       |          |          |          | 0.036    |         |         |         |         |         |
| Shft/esd:           |       |          |          |          | 0.53     |         |         |         |         |         |
| FE+3 ( 1) Moments : |       | 2.670    | 0.000    | 0.000    | 2.670    | 90.000  | 0.000   |         |         |         |
| Sigmas :            |       | 0.043    |          |          | 0.043    | 0.000   | 0.000   |         |         |         |
| Shft/esd:           |       | 0.00     |          |          |          |         |         |         |         |         |
| FE1 moved 0.00A     |       |          |          |          |          |         |         |         |         |         |
|                     |       |          |          |          |          |         |         |         |         |         |
| FE+3 ( 2) Values :  | 0.460 | 0.666670 | 0.333330 | 0.591220 | 0.540    |         |         |         |         |         |
| Sigmas :            |       |          |          |          | 0.036    |         |         |         |         |         |
| Shft/esd:           |       |          |          |          | 0.53     |         |         |         |         |         |
| FE+3 ( 2) Moments : |       | 2.670    | 0.000    | 0.000    | 2.670    | 90.000  | 0.000   |         |         |         |
| Sigmas :            |       | 0.043    |          |          | 0.043    | 0.000   | 0.000   |         |         |         |
| Shft/esd:           |       | 0.00     |          |          |          |         |         |         |         |         |
| FE2 moved 0.00A     |       |          |          |          |          |         |         |         |         |         |
|                     |       |          |          |          |          |         |         |         |         |         |
| FE+3 ( 3) Values :  | 0.460 | 0.333330 | 0.666670 | 0.924560 | 0.540    |         |         |         |         |         |
| Sigmas :            |       |          |          |          | 0.036    |         |         |         |         |         |
| Shft/esd:           |       |          |          |          | 0.53     |         |         |         |         |         |
| FE+3 ( 3) Moments : |       | 2.670    | 0.000    | 0.000    | 2.670    | 90.000  | 0.000   |         |         |         |
| Sigmas :            |       | 0.043    |          |          | 0.043    | 0.000   | 0.000   |         |         |         |
| Shft/esd:           |       | 0.00     |          |          |          |         |         |         |         |         |
| FE3 moved 0.00A     |       |          |          |          |          |         |         |         |         |         |
|                     |       |          |          |          |          |         |         |         |         |         |
| FE+3 ( 4) Values :  | 0.460 | 0.000000 | 0.000000 | 0.757890 | 0.540    |         |         |         |         |         |
| Sigmas :            |       |          |          |          | 0.036    |         |         |         |         |         |
| Shft/esd:           |       |          |          |          | 0.53     |         |         |         |         |         |
| FE+3 ( 4) Moments : |       | -2.670   | 0.000    | 0.000    | 2.670    | 90.000  | 180.000 |         |         |         |
| Sigmas :            |       | 0.043    |          |          | 0.043    | 0.000   | 0.000   |         |         |         |
| Shft/esd:           |       | 0.00     |          |          |          |         |         |         |         |         |
| FE4 moved 0.00A     |       |          |          |          |          |         |         |         |         |         |
|                     |       |          |          |          |          |         |         |         |         |         |
| 1SF0                |       |          |          |          |          |         |         |         |         |         |
| Page 25             |       |          |          |          |          |         |         |         |         |         |
|                     |       |          |          |          |          |         |         |         |         |         |
| FE+3 ( 5) Values :  | 0.460 | 0.666670 | 0.333330 | 0.091220 | 0.540    |         |         |         |         |         |
| Sigmas :            |       |          |          |          | 0.036    |         |         |         |         |         |
| Shft/esd:           |       |          |          |          | 0.53     |         |         |         |         |         |
| FE+3 ( 5) Moments : |       | -2.670   | 0.000    | 0.000    | 2.670    | 90.000  | 180.000 |         |         |         |
| Sigmas :            |       | 0.043    |          |          | 0.043    | 0.000   | 0.000   |         |         |         |
| Shft/esd:           |       | 0.00     |          |          |          |         |         |         |         |         |
| FE5 moved 0.00A     |       |          |          |          |          |         |         |         |         |         |
|                     |       |          |          |          |          |         |         |         |         |         |
| FE+3 ( 6) Values :  | 0.460 | 0.333330 | 0.666670 | 0.424560 | 0.540    |         |         |         |         |         |
| Sigmas :            |       |          |          |          | 0.036    |         |         |         |         |         |
| Shft/esd:           |       |          |          |          | 0.53     |         |         |         |         |         |
| FE+3 ( 6) Moments : |       | -2.670   | 0.000    | 0.000    | 2.670    | 90.000  | 180.000 |         |         |         |
| Sigmas :            |       | 0.043    |          |          | 0.043    | 0.000   | 0.000   |         |         |         |
| Shft/esd:           |       | 0.00     |          |          |          |         |         |         |         |         |
| FE6 moved 0.00A     |       |          |          |          |          |         |         |         |         |         |
|                     |       |          |          |          |          |         |         |         |         |         |
| FE+3 ( 7) Values :  | 0.540 | 0.000000 | 0.000000 | 0.047676 | 0.354    |         |         |         |         |         |
| Sigmas :            |       |          |          | 0.000050 | 0.032    |         |         |         |         |         |
| Shft/esd:           |       |          |          | -0.11    | -0.52    |         |         |         |         |         |
| FE+3 ( 7) Moments : |       | -2.670   | 0.000    | 0.000    | 2.670    | 90.000  | 180.000 |         |         |         |
| Sigmas :            |       | 0.043    |          |          | 0.043    | 0.000   | 0.000   |         |         |         |
| Shft/esd:           |       | 0.00     |          |          |          |         |         |         |         |         |

FE7 moved 0.00A sum(shift/e.s.d)\*\*2 : 0.28

FE+3 ( 8) Values : 0.540 0.666670 0.333330 0.381006 0.354  
 Sigmas : 0.000050 0.032  
 Shft/esd: -0.11 -0.52

FE+3 ( 8) Moments : -2.670 0.000 0.000 2.670 90.000 180.000  
 Sigmas : 0.043 0.043 0.000 0.000  
 Shft/esd: 0.00

FE8 moved 0.00A sum(shift/e.s.d)\*\*2 : 0.28

FE+3 ( 9) Values : 0.540 0.333330 0.666670 0.714347 0.354  
 Sigmas : 0.000050 0.032  
 Shft/esd: -0.11 -0.52

FE+3 ( 9) Moments : -2.670 0.000 0.000 2.670 90.000 180.000  
 Sigmas : 0.043 0.043 0.000 0.000  
 Shft/esd: 0.00

FE9 moved 0.00A sum(shift/e.s.d)\*\*2 : 0.28

1SF0  
 Page 26

GENLES Version Win32 Jun 24 14:07:30 2011

FE+3 ( 10) Values : 0.540 0.000000 0.000000 0.547677 0.354  
 Sigmas : 0.000050 0.032  
 Shft/esd: -0.11 -0.52

FE+3 ( 10) Moments : 2.670 0.000 0.000 2.670 90.000 0.000  
 Sigmas : 0.043 0.043 0.000 0.000  
 Shft/esd: 0.00

FE10 moved 0.00A sum(shift/e.s.d)\*\*2 : 0.28

FE+3 ( 11) Values : 0.540 0.666670 0.333330 0.881007 0.354  
 Sigmas : 0.000050 0.032  
 Shft/esd: -0.11 -0.52

FE+3 ( 11) Moments : 2.670 0.000 0.000 2.670 90.000 0.000  
 Sigmas : 0.043 0.043 0.000 0.000  
 Shft/esd: 0.00

FE11 moved 0.00A sum(shift/e.s.d)\*\*2 : 0.28

FE+3 ( 12) Values : 0.540 0.333330 0.666670 0.214347 0.354  
 Sigmas : 0.000050 0.032  
 Shft/esd: -0.11 -0.52

FE+3 ( 12) Moments : 2.670 0.000 0.000 2.670 90.000 0.000  
 Sigmas : 0.043 0.043 0.000 0.000  
 Shft/esd: 0.00

FE12 moved 0.00A sum(shift/e.s.d)\*\*2 : 0.28

Maximum atom shift: 0.00

Atomic parameter sum(shift/error)\*\*2 for phase 2 : 3.38

Calculated unit cell formula weight: 335.082, density: 1.694gm/cm\*\*3

Histogram scale factors:

| Histogram:                                   | 1 PNT        | 2 PNT        | 3 PNT        | 4 PNT*  | 5 PXC*  |
|----------------------------------------------|--------------|--------------|--------------|---------|---------|
| Scale :                                      | 8.77307      | 8.78074      | 10.0725      | 0.00000 | 0.00000 |
| Sigmas :                                     | 0.331547E-01 | 0.299920E-01 | 0.362525E-01 | 0.00000 | 0.00000 |
| Shift/esd:                                   | 0.06         | 0.08         | 0.05         | 0.00    | 0.00    |
| Histogram scale factor sum(shift/error)**2 : | 0.01         |              |              |         |         |

Lattice parameters for powder data:

Phase 1

|          | a        | b        | c         | alpha  | beta   | gamma   | volume  |
|----------|----------|----------|-----------|--------|--------|---------|---------|
| Value :  | 5.202475 | 5.202475 | 14.014489 | 90.000 | 90.000 | 120.000 | 328.494 |
| Sigmas : | 0.000004 | 0.000004 | 0.000113  | 0.000  | 0.000  | 0.000   | 0.003   |

Reciprocal metric tensor shift factor = 100%

Phase 2

|          | a        | b        | c         | alpha  | beta   | gamma   | volume  |
|----------|----------|----------|-----------|--------|--------|---------|---------|
| Value :  | 5.202432 | 5.202446 | 14.014500 | 90.000 | 90.000 | 119.999 | 328.494 |
| Sigmas : | 0.000007 | 0.000007 | 0.000113  | 0.000  | 0.000  | 0.000   | 0.003   |

Reciprocal metric tensor shift factor = 100%

Reciprocal metric tensor sum(shift/error)\*\*2 : 0.00

1SF0  
 Page 27

GENLES Version Win32 Jun 24 14:07:30 2011

Diffraction coefficients for powder data:

| Histogram :                      | 1 PNT        | 2 PNT    | 3 PNT        | 4 PNT*  | 5 PXC*  |
|----------------------------------|--------------|----------|--------------|---------|---------|
| C/L1/R/2Th:                      | 4569.20      | 6162.13  | 2139.59      | 0.00000 | 0.00000 |
| Sigmas :                         | 0.105498     | 0.00000  | 0.153598     | 0.00000 | 0.00000 |
| Shift/esd :                      | 0.01         | 0.00     | 0.00         | 0.00    | 0.00    |
| Dif A/Pol:                       | -0.970344    | -2.51000 | 1.29547      | 0.00000 | 0.00000 |
| Sigmas :                         | 0.627769E-01 | 0.00000  | 0.698622E-01 | 0.00000 | 0.00000 |
| Shift/esd :                      | 0.01         | 0.00     | 0.00         | 0.00    | 0.00    |
| Zero :                           | 1.90000      | 3.85000  | 9.03000      | 0.00000 | 0.00000 |
| Sigmas :                         | 0.00000      | 0.00000  | 0.00000      | 0.00000 | 0.00000 |
| Shift/esd :                      | 0.01         | 0.00     | 0.00         | 0.00    | 0.00    |
| Dif. Cons. Sum(shift/error)**2 : | 0.00         |          |              |         |         |

Profile coefficients for histogram no. 1 and for phase no. 1:

| Coeff. :   | alp       | be-0      | be-1      | sg-0      | sg-1      | sg-2      | ga-0      | ga-1      | ga-2      |
|------------|-----------|-----------|-----------|-----------|-----------|-----------|-----------|-----------|-----------|
| gsf        |           |           |           |           |           |           |           |           |           |
| Value :    | 2.898E-01 | 5.288E-02 | 7.468E-03 | 0.000E+00 | 2.460E+01 | 2.080E+00 | 0.000E+00 | 3.151E+00 | 0.000E+00 |
| Sigmas :   |           |           |           |           | 8.515E-01 |           |           | 1.561E-01 |           |
| Shift/esd: |           |           |           |           | 0.00      |           |           | 0.00      |           |
| Coeff. :   | g1ec      | g2ec      | rstr      | rsta      | rsca      | L11       | L22       | L33       | L12       |
| L13        |           |           |           |           |           |           |           |           |           |
| Value :    | 0.000E+00 |
| Sigmas :   |           |           |           |           |           |           |           |           |           |
| Shift/esd: |           |           |           |           |           |           |           |           |           |
| Coeff. :   | L23       |           |           |           |           |           |           |           |           |
| Value :    | 0.000E+00 |           |           |           |           |           |           |           |           |
| Sigmas :   |           |           |           |           |           |           |           |           |           |
| Shift/esd: |           |           |           |           |           |           |           |           |           |

Profile coefficients for histogram no. 2 and for phase no. 1:

| Coeff. :   | alp       | be-0      | be-1      | sg-0      | sg-1      | sg-2       | ga-0      | ga-1      | ga-2      |
|------------|-----------|-----------|-----------|-----------|-----------|------------|-----------|-----------|-----------|
| gsf        |           |           |           |           |           |            |           |           |           |
| Value :    | 4.108E+00 | 6.789E-02 | 2.857E-03 | 3.543E+00 | 4.379E+01 | -1.859E+00 | 0.000E+00 | 4.532E-02 | 1.628E+00 |
| Sigmas :   |           |           |           |           | 7.583E-01 |            |           | 1.182E-01 |           |
| Shift/esd: |           |           |           |           | 0.00      |            |           | 0.00      |           |
| Coeff. :   | g1ec      | g2ec      | rstr      | rsta      | rsca      | L11        | L22       | L33       | L12       |
| L13        |           |           |           |           |           |            |           |           |           |
| Value :    | 0.000E+00 | 0.000E+00 | 0.000E+00 | 0.000E+00 | 0.000E+00 | 0.000E+00  | 0.000E+00 | 0.000E+00 | 0.000E+00 |
| Sigmas :   |           |           |           |           |           |            |           |           |           |
| Shift/esd: |           |           |           |           |           |            |           |           |           |
| Coeff. :   | L23       |           |           |           |           |            |           |           |           |
| Value :    | 0.000E+00 |           |           |           |           |            |           |           |           |
| Sigmas :   |           |           |           |           |           |            |           |           |           |
| Shift/esd: |           |           |           |           |           |            |           |           |           |

Profile coefficients for histogram no. 3 and for phase no. 1:

| Coeff. :   | alp       | be-0      | be-1      | sg-0      | sg-1      | sg-2      | ga-0      | ga-1      | ga-2      |
|------------|-----------|-----------|-----------|-----------|-----------|-----------|-----------|-----------|-----------|
| gsf        |           |           |           |           |           |           |           |           |           |
| Value :    | 1.000E+00 | 5.279E-02 | 2.026E-01 | 2.192E+01 | 7.865E+01 | 1.284E+00 | 0.000E+00 | 0.000E+00 | 0.000E+00 |
| Sigmas :   |           |           |           |           | 8.469E-01 |           |           |           |           |
| Shift/esd: |           |           |           |           | 0.00      |           |           |           |           |
| Coeff. :   | g1ec      | g2ec      | rstr      | rsta      | rsca      | L11       | L22       | L33       | L12       |
| L13        |           |           |           |           |           |           |           |           |           |
| Value :    | 0.000E+00 |
| Sigmas :   |           |           |           |           |           |           |           |           |           |
| Shift/esd: |           |           |           |           |           |           |           |           |           |
| Coeff. :   | L23       |           |           |           |           |           |           |           |           |
| Value :    | 0.000E+00 |           |           |           |           |           |           |           |           |
| Sigmas :   |           |           |           |           |           |           |           |           |           |
| Shift/esd: |           |           |           |           |           |           |           |           |           |

1SF0

GENLES Version Win32 Jun 24 14:07:30 2011

Page 28

Profile coefficients for histogram no. 1 and for phase no. 2:

| Coeff. : | alp       | be-0      | be-1      | sg-0      | sg-1      | sg-2      | ga-0      | ga-1      | ga-2      |
|----------|-----------|-----------|-----------|-----------|-----------|-----------|-----------|-----------|-----------|
| gsf      |           |           |           |           |           |           |           |           |           |
| Value :  | 2.898E-01 | 5.288E-02 | 7.468E-03 | 0.000E+00 | 2.460E+01 | 2.080E+00 | 0.000E+00 | 3.151E+00 | 0.000E+00 |



0.000E+00  
 Sigmas :  
 Shift/esd:  
 Coeff. : g1ec g2ec rstr rsta rscA L11 L22 L33 L12  
 L13  
 Value : 0.000E+00  
 0.000E+00  
 Sigmas :  
 Shift/esd:  
 Coeff. : L23  
 Value : 0.000E+00  
 Sigmas :  
 Shift/esd:

Profile coefficients for histogram no. 2 and for phase no. 2:  
 Coeff. : alp be-0 be-1 sg-0 sg-1 sg-2 ga-0 ga-1 ga-2  
 gsF  
 Value : 4.108E+00 6.789E-02 2.857E-03 3.543E+00 4.379E+01 -1.859E+00 0.000E+00 4.532E-02 1.628E+00  
 0.000E+00  
 Sigmas :  
 Shift/esd:  
 Coeff. : g1ec g2ec rstr rsta rscA L11 L22 L33 L12  
 L13  
 Value : 0.000E+00  
 0.000E+00  
 Sigmas :  
 Shift/esd:  
 Coeff. : L23  
 Value : 0.000E+00  
 Sigmas :  
 Shift/esd:

Profile coefficients for histogram no. 3 and for phase no. 2:  
 Coeff. : alp be-0 be-1 sg-0 sg-1 sg-2 ga-0 ga-1 ga-2  
 gsF  
 Value : 1.000E+00 5.279E-02 2.026E-01 2.192E+01 7.865E+01 1.284E+00 0.000E+00 0.000E+00 0.000E+00  
 0.000E+00  
 Sigmas :  
 Shift/esd:  
 Coeff. : g1ec g2ec rstr rsta rscA L11 L22 L33 L12  
 L13  
 Value : 0.000E+00  
 0.000E+00  
 Sigmas :  
 Shift/esd:  
 Coeff. : L23  
 Value : 0.000E+00  
 Sigmas :  
 Shift/esd:  
 Profile coef. sum(shift/error)\*\*2 : 0.00

Background coefficients for histogram no. 1:  
 Param. : 1 2 3 4 5 6  
 Coeff. : 3.303997E-01 -1.781429E-02 5.273131E-02 -1.853438E-02 -9.865087E-03 -3.958838E-02  
 Sigmas : 4.613976E-03 8.661765E-03 7.903889E-03 7.311775E-03 6.852463E-03 6.160628E-03  
 Shift/esd: -0.01 0.00 -0.01 0.00 -0.01 0.00  
 Param. : 7 8 9  
 Coeff. : -1.857017E-02 -1.532964E-02 -7.150317E-03  
 Sigmas : 5.221894E-03 3.640648E-03 1.897035E-03  
 Shift/esd: -0.01 0.00 -0.01

Background coefficients for histogram no. 2:  
 Param. : 1 2 3 4 5 6  
 Coeff. : 2.736521E-01 -9.805740E-02 9.465559E-03 -1.770812E-02 1.122679E-02 -8.160715E-03  
 Sigmas : 2.500101E-03 4.625359E-03 4.215546E-03 3.985877E-03 3.837598E-03 3.726889E-03  
 Shift/esd: -0.01 0.00 -0.01 0.00 -0.01 0.00  
 Param. : 7 8 9 10 11 12  
 Coeff. : 1.290782E-04 -1.502829E-02 -7.053775E-03 1.797236E-03 3.511501E-03 -1.699015E-02  
 Sigmas : 3.603122E-03 3.500125E-03 3.258444E-03 2.870640E-03 2.146235E-03 1.151758E-03  
 Shift/esd: -0.01 -0.01 -0.01 -0.01 -0.02 -0.04  
 Background coef. sum(shift/error)\*\*2 : 0.00

Restraint data statistics:  
 No restraints used

| Powder data statistics |      |       | Fitted      |        | -Bknd  |        | pFree  |        | Average |        |     |          |       |
|------------------------|------|-------|-------------|--------|--------|--------|--------|--------|---------|--------|-----|----------|-------|
|                        | Bank | Ndata | Sum(w*d**2) | wRp    | Rp     | wRp    | Rp     | wRp    | Rp      | Npfree | DWd | Integral |       |
| Hstgm                  | 1    | PNT   | 1 4524      | 4592.5 | 0.0694 | 0.1159 | 3.0072 | 0.6136 | 0.0000  | 0.0000 | 0   | 0.658    | 0.982 |
| Hstgm                  | 2    | PNT   | 2 3753      | 4940.7 | 0.0449 | 0.0945 | 0.1091 | 0.1135 | 0.0000  | 0.0000 | 0   | 0.462    | 0.990 |
| Hstgm                  | 3    | PNT   | 3 4808      | 4303.2 | 0.1278 | 0.1742 | 3.2083 | 0.7146 | 0.0000  | 0.0000 | 0   | 0.732    | 0.997 |
| Powder totals          |      |       | 13085       | 13836. | 0.0614 | 0.1237 | 1.9002 | 0.4462 | 0.0000  | 0.0000 | 0   | 0.611    |       |

No serial correlation in fit at 90% confidence for 1.952 < DWd < 2.048  
 Cycle1160 There were 13085 observations.  
 Total before-cycle CHI\*\*2 (offset/sig) = 1.3836E+04 ( 4.9191E+00)  
 Reduced CHI\*\*2 = 1.061 for 43 variables

Reflection data statistics  
 Histogram 1 Type PNT Nobs = 1302 R(F\*\*2) = 0.1149  
 Histogram 2 Type PNT Nobs = 1071 R(F\*\*2) = 0.0982  
 Histogram 3 Type PNT Nobs = 857 R(F\*\*2) = 0.0805  
 After matrix normalization and Marquardt modification:

1 Columns of the 43 Column matrix are 0.0  
 Full matrix recip. condition value & -log10 = 0.2034E-03 3.69  
 Variable NoVarabl was not refined

The value of the determinant is 1.3134\*10.0\*\*( -22)

Atom parameters for phase no. 1

|           | frac        | x       | y                     | z         | 100*Uiso | 100*U11 | 100*U22 | 100*U33 | 100*U12 | 100*U13 |
|-----------|-------------|---------|-----------------------|-----------|----------|---------|---------|---------|---------|---------|
| 100*U23   |             |         |                       |           |          |         |         |         |         |         |
| SC+3 ( 1) | Values      | : 0.460 | 0.000000              | 0.000000  | 0.047681 | 0.366   |         |         |         |         |
|           | Sigmas      | :       |                       |           | 0.000050 | 0.031   |         |         |         |         |
|           | Shft/esd:   |         |                       |           | 0.09     | 0.40    |         |         |         |         |
| Sc1       | moved 0.00A |         | sum(shift/e.s.d)**2 : | 0.17      |          |         |         |         |         |         |
| FE+3 ( 2) | Values      | : 0.460 | 0.000000              | 0.000000  | 0.257903 | 0.526   |         |         |         |         |
|           | Sigmas      | :       |                       |           |          | 0.035   |         |         |         |         |
|           | Shft/esd:   |         |                       |           |          | -0.39   |         |         |         |         |
| Fe1       | moved 0.00A |         | sum(shift/e.s.d)**2 : | 0.16      |          |         |         |         |         |         |
| 0 ( 3)    | Values      | : 1.000 | 0.342328              | -0.026072 | 0.817567 | 0.486   |         |         |         |         |
|           | Sigmas      | :       | 0.000390              | 0.000228  | 0.000227 | 0.010   |         |         |         |         |
|           | Shft/esd:   |         | 0.01                  | 0.01      | -0.11    | -0.06   |         |         |         |         |
| 01        | moved 0.00A |         | sum(shift/e.s.d)**2 : | 0.02      |          |         |         |         |         |         |
| FE+3 ( 4) | Values      | : 0.540 | 0.000000              | 0.000000  | 0.047681 | 0.366   |         |         |         |         |
|           | Sigmas      | :       |                       |           | 0.000050 | 0.031   |         |         |         |         |
|           | Shft/esd:   |         |                       |           | 0.09     | 0.40    |         |         |         |         |
| Fe2       | moved 0.00A |         | sum(shift/e.s.d)**2 : | 0.17      |          |         |         |         |         |         |

|           |             |         |                       |          |          |       |  |  |  |  |
|-----------|-------------|---------|-----------------------|----------|----------|-------|--|--|--|--|
| SC+3 ( 5) | Values      | : 0.540 | 0.000000              | 0.000000 | 0.257903 | 0.526 |  |  |  |  |
|           | Sigmas      | :       |                       |          |          | 0.035 |  |  |  |  |
|           | Shft/esd:   |         |                       |          |          | -0.39 |  |  |  |  |
| Sc2       | moved 0.00A |         | sum(shift/e.s.d)**2 : | 0.16     |          |       |  |  |  |  |

Maximum atom shift: 0.00  
 Atomic parameter sum(shift/error)\*\*2 for phase 1 : 0.66  
 Calculated unit cell formula weight: 892.800, density: 4.513gm/cm\*\*3

Atom parameters for phase no. 2

|           | frac      | x       | y        | z        | 100*Uiso | 100*U11 | 100*U22 | 100*U33 | 100*U12 | 100*U13 |
|-----------|-----------|---------|----------|----------|----------|---------|---------|---------|---------|---------|
| 100*U23   |           |         |          |          |          |         |         |         |         |         |
| FE+3 ( 1) | Values    | : 0.460 | 0.000000 | 0.000000 | 0.257890 | 0.526   |         |         |         |         |
|           | Sigmas    | :       |          |          |          | 0.035   |         |         |         |         |
|           | Shft/esd: |         |          |          |          | -0.39   |         |         |         |         |
| FE+3 ( 1) | Moments   | :       | 2.670    | 0.000    | 0.000    | 2.670   | 90.000  | 0.000   |         |         |

|      |             |                       |                         |          |       |        |         |
|------|-------------|-----------------------|-------------------------|----------|-------|--------|---------|
|      |             | Sigmas :              | 0.043                   |          | 0.043 | 0.000  | 0.000   |
|      |             | Shft/esd:             | 0.00                    |          |       |        |         |
| FE1  | moved 0.00A | sum(shift/e.s.d)**2 : | 0.16                    |          |       |        |         |
| FE+3 | ( 2)        | Values :              | 0.460 0.666670 0.333330 | 0.591220 | 0.526 |        |         |
|      |             | Sigmas :              |                         |          | 0.035 |        |         |
|      |             | Shft/esd:             |                         |          | -0.39 |        |         |
| FE+3 | ( 2)        | Moments :             | 2.670 0.000 0.000       | 0.000    | 2.670 | 90.000 | 0.000   |
|      |             | Sigmas :              | 0.043                   |          | 0.043 | 0.000  | 0.000   |
|      |             | Shft/esd:             | 0.00                    |          |       |        |         |
| FE2  | moved 0.00A | sum(shift/e.s.d)**2 : | 0.16                    |          |       |        |         |
| FE+3 | ( 3)        | Values :              | 0.460 0.333330 0.666670 | 0.924560 | 0.526 |        |         |
|      |             | Sigmas :              |                         |          | 0.035 |        |         |
|      |             | Shft/esd:             |                         |          | -0.39 |        |         |
| FE+3 | ( 3)        | Moments :             | 2.670 0.000 0.000       | 0.000    | 2.670 | 90.000 | 0.000   |
|      |             | Sigmas :              | 0.043                   |          | 0.043 | 0.000  | 0.000   |
|      |             | Shft/esd:             | 0.00                    |          |       |        |         |
| FE3  | moved 0.00A | sum(shift/e.s.d)**2 : | 0.16                    |          |       |        |         |
| FE+3 | ( 4)        | Values :              | 0.460 0.000000 0.000000 | 0.757890 | 0.526 |        |         |
|      |             | Sigmas :              |                         |          | 0.035 |        |         |
|      |             | Shft/esd:             |                         |          | -0.39 |        |         |
| FE+3 | ( 4)        | Moments :             | -2.670 0.000 0.000      | 0.000    | 2.670 | 90.000 | 180.000 |
|      |             | Sigmas :              | 0.043                   |          | 0.043 | 0.000  | 0.000   |
|      |             | Shft/esd:             | 0.00                    |          |       |        |         |
| FE4  | moved 0.00A | sum(shift/e.s.d)**2 : | 0.16                    |          |       |        |         |

|      |             |                       |                         |          |       |        |         |
|------|-------------|-----------------------|-------------------------|----------|-------|--------|---------|
| FE+3 | ( 5)        | Values :              | 0.460 0.666670 0.333330 | 0.091220 | 0.526 |        |         |
|      |             | Sigmas :              |                         |          | 0.035 |        |         |
|      |             | Shft/esd:             |                         |          | -0.39 |        |         |
| FE+3 | ( 5)        | Moments :             | -2.670 0.000 0.000      | 0.000    | 2.670 | 90.000 | 180.000 |
|      |             | Sigmas :              | 0.043                   |          | 0.043 | 0.000  | 0.000   |
|      |             | Shft/esd:             | 0.00                    |          |       |        |         |
| FE5  | moved 0.00A | sum(shift/e.s.d)**2 : | 0.16                    |          |       |        |         |
| FE+3 | ( 6)        | Values :              | 0.460 0.333330 0.666670 | 0.424560 | 0.526 |        |         |
|      |             | Sigmas :              |                         |          | 0.035 |        |         |
|      |             | Shft/esd:             |                         |          | -0.39 |        |         |
| FE+3 | ( 6)        | Moments :             | -2.670 0.000 0.000      | 0.000    | 2.670 | 90.000 | 180.000 |
|      |             | Sigmas :              | 0.043                   |          | 0.043 | 0.000  | 0.000   |
|      |             | Shft/esd:             | 0.00                    |          |       |        |         |
| FE6  | moved 0.00A | sum(shift/e.s.d)**2 : | 0.16                    |          |       |        |         |
| FE+3 | ( 7)        | Values :              | 0.540 0.000000 0.000000 | 0.047681 | 0.366 |        |         |
|      |             | Sigmas :              |                         | 0.000050 | 0.031 |        |         |
|      |             | Shft/esd:             |                         | 0.09     | 0.40  |        |         |
| FE+3 | ( 7)        | Moments :             | -2.670 0.000 0.000      | 0.000    | 2.670 | 90.000 | 180.000 |
|      |             | Sigmas :              | 0.043                   |          | 0.043 | 0.000  | 0.000   |
|      |             | Shft/esd:             | 0.00                    |          |       |        |         |
| FE7  | moved 0.00A | sum(shift/e.s.d)**2 : | 0.17                    |          |       |        |         |
| FE+3 | ( 8)        | Values :              | 0.540 0.666670 0.333330 | 0.381011 | 0.366 |        |         |
|      |             | Sigmas :              |                         | 0.000050 | 0.031 |        |         |
|      |             | Shft/esd:             |                         | 0.09     | 0.40  |        |         |
| FE+3 | ( 8)        | Moments :             | -2.670 0.000 0.000      | 0.000    | 2.670 | 90.000 | 180.000 |
|      |             | Sigmas :              | 0.043                   |          | 0.043 | 0.000  | 0.000   |
|      |             | Shft/esd:             | 0.00                    |          |       |        |         |
| FE8  | moved 0.00A | sum(shift/e.s.d)**2 : | 0.17                    |          |       |        |         |
| FE+3 | ( 9)        | Values :              | 0.540 0.333330 0.666670 | 0.714352 | 0.366 |        |         |
|      |             | Sigmas :              |                         | 0.000050 | 0.031 |        |         |
|      |             | Shft/esd:             |                         | 0.09     | 0.40  |        |         |
| FE+3 | ( 9)        | Moments :             | -2.670 0.000 0.000      | 0.000    | 2.670 | 90.000 | 180.000 |
|      |             | Sigmas :              | 0.043                   |          | 0.043 | 0.000  | 0.000   |

Shft/esd: 0.00  
FE9 moved 0.00A sum(shift/e.s.d)\*\*2 : 0.17

1SF0  
Page 33

GENLES Version Win32 Jun 24 14:07:32 2011

FE+3 ( 10) Values : 0.540 0.000000 0.000000 0.547682 0.366  
Sigmas : 0.000050 0.031  
Shft/esd: 0.09 0.40  
FE+3 ( 10) Moments : 2.670 0.000 0.000 2.670 90.000 0.000  
Sigmas : 0.043 0.043 0.000 0.000  
Shft/esd: 0.00  
FE10 moved 0.00A sum(shift/e.s.d)\*\*2 : 0.17  
FE+3 ( 11) Values : 0.540 0.666670 0.333330 0.881012 0.366  
Sigmas : 0.000050 0.031  
Shft/esd: 0.09 0.40  
FE+3 ( 11) Moments : 2.670 0.000 0.000 2.670 90.000 0.000  
Sigmas : 0.043 0.043 0.000 0.000  
Shft/esd: 0.00  
FE11 moved 0.00A sum(shift/e.s.d)\*\*2 : 0.17  
FE+3 ( 12) Values : 0.540 0.333330 0.666670 0.214352 0.366  
Sigmas : 0.000050 0.031  
Shft/esd: 0.09 0.40  
FE+3 ( 12) Moments : 2.670 0.000 0.000 2.670 90.000 0.000  
Sigmas : 0.043 0.043 0.000 0.000  
Shft/esd: 0.00  
FE12 moved 0.00A sum(shift/e.s.d)\*\*2 : 0.17

Maximum atom shift: 0.00  
Atomic parameter sum(shift/error)\*\*2 for phase 2 : 1.94  
Calculated unit cell formula weight: 335.082, density: 1.694gm/cm\*\*3

Histogram scale factors:

|            |              |              |              |         |         |
|------------|--------------|--------------|--------------|---------|---------|
| Histogram: | 1 PNT        | 2 PNT        | 3 PNT        | 4 PNT*  | 5 PXC*  |
| Scale :    | 8.77175      | 8.77910      | 10.0715      | 0.00000 | 0.00000 |
| Sigmas :   | 0.332279E-01 | 0.301041E-01 | 0.362925E-01 | 0.00000 | 0.00000 |
| Shift/esd: | -0.04        | -0.05        | -0.03        | 0.00    | 0.00    |

Histogram scale factor sum(shift/error)\*\*2 : 0.01

Lattice parameters for powder data:

Phase 1

|          |          |          |           |        |        |         |         |
|----------|----------|----------|-----------|--------|--------|---------|---------|
|          | a        | b        | c         | alpha  | beta   | gamma   | volume  |
| Value :  | 5.202475 | 5.202475 | 14.014489 | 90.000 | 90.000 | 120.000 | 328.494 |
| Sigmas : | 0.000004 | 0.000004 | 0.000114  | 0.000  | 0.000  | 0.000   | 0.003   |

Reciprocal metric tensor shift factor = 100%

Phase 2

|          |          |          |           |        |        |         |         |
|----------|----------|----------|-----------|--------|--------|---------|---------|
|          | a        | b        | c         | alpha  | beta   | gamma   | volume  |
| Value :  | 5.202432 | 5.202446 | 14.014500 | 90.000 | 90.000 | 119.999 | 328.494 |
| Sigmas : | 0.000007 | 0.000007 | 0.000114  | 0.000  | 0.000  | 0.000   | 0.003   |

Reciprocal metric tensor shift factor = 100%

Reciprocal metric tensor sum(shift/error)\*\*2 : 0.00

1SF0  
Page 34

GENLES Version Win32 Jun 24 14:07:32 2011

Diffraction coefficients for powder data:

|             |              |          |              |         |         |
|-------------|--------------|----------|--------------|---------|---------|
| Histogram : | 1 PNT        | 2 PNT    | 3 PNT        | 4 PNT*  | 5 PXC*  |
| C/L1/R/2Th: | 4569.20      | 6162.13  | 2139.59      | 0.00000 | 0.00000 |
| Sigmas :    | 0.105498     | 0.00000  | 0.153608     | 0.00000 | 0.00000 |
| Shift/esd : | -0.01        | 0.00     | 0.00         | 0.00    | 0.00    |
| Dif A/Pol:  | -0.969971    | -2.51000 | 1.29553      | 0.00000 | 0.00000 |
| Sigmas :    | 0.627730E-01 | 0.00000  | 0.698632E-01 | 0.00000 | 0.00000 |
| Shift/esd : | -0.01        | 0.00     | 0.00         | 0.00    | 0.00    |
| Zero :      | 1.90000      | 3.85000  | 9.03000      | 0.00000 | 0.00000 |
| Sigmas :    | 0.00000      | 0.00000  | 0.00000      | 0.00000 | 0.00000 |
| Shift/esd : | -0.01        | 0.00     | 0.00         | 0.00    | 0.00    |

Dif. Cons. Sum(shift/error)\*\*2 : 0.00

Profile coefficients for histogram no. 1 and for phase no. 1:

|          |     |      |      |      |      |      |      |      |      |
|----------|-----|------|------|------|------|------|------|------|------|
| Coeff. : | alp | be-0 | be-1 | sg-0 | sg-1 | sg-2 | ga-0 | ga-1 | ga-2 |
|----------|-----|------|------|------|------|------|------|------|------|

gsf  
 Value : 2.898E-01 5.288E-02 7.468E-03 0.000E+00 2.460E+01 2.080E+00 0.000E+00 3.151E+00 0.000E+00  
 0.000E+00  
 Sigmas : 8.514E-01 1.560E-01  
 Shift/esd: 0.00 0.00  
 Coeff. : g1ec g2ec rstr rsta rsca L11 L22 L33 L12  
 L13  
 Value : 0.000E+00 0.000E+00 0.000E+00 0.000E+00 0.000E+00 0.000E+00 0.000E+00 0.000E+00 0.000E+00  
 0.000E+00  
 Sigmas :  
 Shift/esd:  
 Coeff. : L23  
 Value : 0.000E+00  
 Sigmas :  
 Shift/esd:

Profile coefficients for histogram no. 2 and for phase no. 1:

Coeff. : alp be-0 be-1 sg-0 sg-1 sg-2 ga-0 ga-1 ga-2  
 gsf  
 Value : 4.108E+00 6.789E-02 2.857E-03 3.543E+00 4.379E+01 -1.859E+00 0.000E+00 4.552E-02 1.628E+00  
 0.000E+00  
 Sigmas : 7.582E-01 1.182E-01  
 Shift/esd: 0.00 0.00  
 Coeff. : g1ec g2ec rstr rsta rsca L11 L22 L33 L12  
 L13  
 Value : 0.000E+00 0.000E+00 0.000E+00 0.000E+00 0.000E+00 0.000E+00 0.000E+00 0.000E+00 0.000E+00  
 0.000E+00  
 Sigmas :  
 Shift/esd:  
 Coeff. : L23  
 Value : 0.000E+00  
 Sigmas :  
 Shift/esd:

Profile coefficients for histogram no. 3 and for phase no. 1:

Coeff. : alp be-0 be-1 sg-0 sg-1 sg-2 ga-0 ga-1 ga-2  
 gsf  
 Value : 1.000E+00 5.279E-02 2.026E-01 2.192E+01 7.865E+01 1.284E+00 0.000E+00 0.000E+00 0.000E+00  
 0.000E+00  
 Sigmas : 8.469E-01  
 Shift/esd: 0.00  
 Coeff. : g1ec g2ec rstr rsta rsca L11 L22 L33 L12  
 L13  
 Value : 0.000E+00 0.000E+00 0.000E+00 0.000E+00 0.000E+00 0.000E+00 0.000E+00 0.000E+00 0.000E+00  
 0.000E+00  
 Sigmas :  
 Shift/esd:  
 Coeff. : L23  
 Value : 0.000E+00  
 Sigmas :  
 Shift/esd:

1SF0

GENLES Version Win32 Jun 24 14:07:32 2011

Page 35

Profile coefficients for histogram no. 1 and for phase no. 2:

Coeff. : alp be-0 be-1 sg-0 sg-1 sg-2 ga-0 ga-1 ga-2  
 gsf  
 Value : 2.898E-01 5.288E-02 7.468E-03 0.000E+00 2.460E+01 2.080E+00 0.000E+00 3.151E+00 0.000E+00  
 0.000E+00  
 Sigmas : 8.514E-01 1.560E-01  
 Shift/esd: 0.00 0.00  
 Coeff. : g1ec g2ec rstr rsta rsca L11 L22 L33 L12  
 L13  
 Value : 0.000E+00 0.000E+00 0.000E+00 0.000E+00 0.000E+00 0.000E+00 0.000E+00 0.000E+00 0.000E+00  
 0.000E+00  
 Sigmas :  
 Shift/esd:  
 Coeff. : L23  
 Value : 0.000E+00  
 Sigmas :  
 Shift/esd:

Profile coefficients for histogram no. 2 and for phase no. 2:

Coeff. : alp be-0 be-1 sg-0 sg-1 sg-2 ga-0 ga-1 ga-2  
 gsf

Value : 4.108E+00 6.789E-02 2.857E-03 3.543E+00 4.379E+01 -1.859E+00 0.000E+00 4.552E-02 1.628E+00  
 0.000E+00  
 Sigmas : 7.582E-01 1.182E-01  
 Shift/esd: 0.00 0.00  
 Coeff. : g1ec g2ec rstr rsta rsca L11 L22 L33 L12  
 L13  
 Value : 0.000E+00 0.000E+00 0.000E+00 0.000E+00 0.000E+00 0.000E+00 0.000E+00 0.000E+00 0.000E+00  
 0.000E+00  
 Sigmas :  
 Shift/esd:  
 Coeff. : L23  
 Value : 0.000E+00  
 Sigmas :  
 Shift/esd:

Profile coefficients for histogram no. 3 and for phase no. 2:  
 Coeff. : alp be-0 be-1 sg-0 sg-1 sg-2 ga-0 ga-1 ga-2  
 gsfc  
 Value : 1.000E+00 5.279E-02 2.026E-01 2.192E+01 7.865E+01 1.284E+00 0.000E+00 0.000E+00 0.000E+00  
 0.000E+00  
 Sigmas : 8.469E-01  
 Shift/esd: 0.00  
 Coeff. : g1ec g2ec rstr rsta rsca L11 L22 L33 L12  
 L13  
 Value : 0.000E+00 0.000E+00 0.000E+00 0.000E+00 0.000E+00 0.000E+00 0.000E+00 0.000E+00 0.000E+00  
 0.000E+00  
 Sigmas :  
 Shift/esd:  
 Coeff. : L23  
 Value : 0.000E+00  
 Sigmas :  
 Shift/esd:  
 Profile coef. sum(shift/error)\*\*2 : 0.00

Background coefficients for histogram no. 1:  
 Param. : 1 2 3 4 5 6  
 Coeff. : 3.304170E-01 -1.783141E-02 5.277473E-02 -1.855332E-02 -9.825979E-03 -3.959480E-02  
 Sigmas : 4.614030E-03 8.661701E-03 7.903991E-03 7.311732E-03 6.852592E-03 6.160592E-03  
 Shift/esd: 0.00 0.00 0.01 0.00 0.01 0.00  
 Param. : 7 8 9  
 Coeff. : -1.853162E-02 -1.532236E-02 -7.136061E-03  
 Sigmas : 5.222030E-03 3.640612E-03 1.897122E-03  
 Shift/esd: 0.01 0.00 0.01  
 1SF0 GENLES Version Win32 Jun 24 14:07:32 2011  
 Page 36

Background coefficients for histogram no. 2:  
 Param. : 1 2 3 4 5 6  
 Coeff. : 2.736629E-01 -9.805943E-02 9.493842E-03 -1.770923E-02 1.124730E-02 -8.159869E-03  
 Sigmas : 2.500264E-03 4.625425E-03 4.215795E-03 3.985913E-03 3.837736E-03 3.726856E-03  
 Shift/esd: 0.00 0.00 0.01 0.00 0.01 0.00  
 Param. : 7 8 9 10 11 12  
 Coeff. : 1.446880E-04 -1.500416E-02 -7.029905E-03 1.823175E-03 3.536572E-03 -1.696094E-02  
 Sigmas : 3.603180E-03 3.500121E-03 3.258511E-03 2.870693E-03 2.146326E-03 1.151982E-03  
 Shift/esd: 0.00 0.01 0.01 0.01 0.01 0.03  
 Background coef. sum(shift/error)\*\*2 : 0.00  
 CPU times for matrix build 1.59 sec; matrix inversion 0.00 sec  
 Final variable sum((shift/esd)\*\*2) for cycle1160: 0.35 Time: 1.59 sec  
 1SF0 GENLES Version Win32 Jun 24 14:07:32 2011  
 Page 37

Restraint data statistics:  
 No restraints used

| Powder data statistics |            | Fitted      |        | -Bknd  |        | pFree  |        | Average |        |     |          |       |
|------------------------|------------|-------------|--------|--------|--------|--------|--------|---------|--------|-----|----------|-------|
|                        | Bank Ndata | Sum(w*d**2) | wRp    | Rp     | wRp    | Rp     | wRp    | Rp      | Npfree | DWd | Integral |       |
| Hstgm                  | 1 PNT      | 1 4524      | 4592.8 | 0.0694 | 0.1159 | 3.0075 | 0.6137 | 0.0000  | 0.0000 | 0   | 0.658    | 0.982 |
| Hstgm                  | 2 PNT      | 2 3753      | 4940.9 | 0.0449 | 0.0945 | 0.1091 | 0.1135 | 0.0000  | 0.0000 | 0   | 0.462    | 0.990 |
| Hstgm                  | 3 PNT      | 3 4808      | 4302.8 | 0.1278 | 0.1742 | 3.2083 | 0.7146 | 0.0000  | 0.0000 | 0   | 0.733    | 0.997 |
| Powder totals          |            | 13085       | 13836. | 0.0614 | 0.1237 | 1.9004 | 0.4462 | 0.0000  | 0.0000 | 0   | 0.611    |       |

No serial correlation in fit at 90% confidence for 1.952 < DWd < 2.048  
 Cycle1161 There were 13085 observations.

Total before-cycle CHI\*\*2 (offset/sig) = 1.3836E+04 ( 4.9191E+00)  
Reduced CHI\*\*2 = 1.061 for 43 variables

Reflection data statistics

Histogram 1 Type PNT Nobs = 1302 R(F\*\*2) = 0.1148  
Histogram 2 Type PNT Nobs = 1071 R(F\*\*2) = 0.0982  
Histogram 3 Type PNT Nobs = 857 R(F\*\*2) = 0.0805  
After matrix normalization and Marquardt modification:

1 Columns of the 43 Column matrix are 0.0  
Full matrix recip. condition value & -log10 = 0.2036E-03 3.69  
Variable NoVarabl was not refined

The value of the determinant is 1.2766\*10.0\*\*( -22)

Atom parameters for phase no. 1

|                    | frac  | x        | y                     | z        | 100*Uiso | 100*U11 | 100*U22 | 100*U33 | 100*U12 | 100*U13 |
|--------------------|-------|----------|-----------------------|----------|----------|---------|---------|---------|---------|---------|
| 100*U23            |       |          |                       |          |          |         |         |         |         |         |
| SC+3 ( 1) Values : | 0.460 | 0.000000 | 0.000000              | 0.047678 | 0.357    |         |         |         |         |         |
| Sigmas :           |       |          |                       | 0.000050 | 0.032    |         |         |         |         |         |
| Shft/esd:          |       |          |                       | -0.06    | -0.28    |         |         |         |         |         |
| Sc1 moved 0.00A    |       |          | sum(shift/e.s.d)**2 : | 0.08     |          |         |         |         |         |         |
| FE+3 ( 2) Values : | 0.460 | 0.000000 | 0.000000              | 0.257903 | 0.537    |         |         |         |         |         |
| Sigmas :           |       |          |                       |          | 0.036    |         |         |         |         |         |
| Shft/esd:          |       |          |                       |          | 0.29     |         |         |         |         |         |
| Fe1 moved 0.00A    |       |          | sum(shift/e.s.d)**2 : | 0.08     |          |         |         |         |         |         |
| 0 ( 3) Values :    | 1.000 | 0.342323 | -0.026074             | 0.817584 | 0.486    |         |         |         |         |         |
| Sigmas :           |       | 0.000389 | 0.000227              | 0.000226 | 0.010    |         |         |         |         |         |
| Shft/esd:          |       | -0.01    | -0.01                 | 0.08     | 0.05     |         |         |         |         |         |
| 01 moved 0.00A     |       |          | sum(shift/e.s.d)**2 : | 0.01     |          |         |         |         |         |         |
| FE+3 ( 4) Values : | 0.540 | 0.000000 | 0.000000              | 0.047678 | 0.357    |         |         |         |         |         |
| Sigmas :           |       |          |                       | 0.000050 | 0.032    |         |         |         |         |         |
| Shft/esd:          |       |          |                       | -0.06    | -0.28    |         |         |         |         |         |
| Fe2 moved 0.00A    |       |          | sum(shift/e.s.d)**2 : | 0.08     |          |         |         |         |         |         |

1SF0

GENLES Version Win32 Jun 24 14:07:33 2011

Page 38

|                    |       |          |                       |          |       |  |  |  |  |  |
|--------------------|-------|----------|-----------------------|----------|-------|--|--|--|--|--|
| SC+3 ( 5) Values : | 0.540 | 0.000000 | 0.000000              | 0.257903 | 0.537 |  |  |  |  |  |
| Sigmas :           |       |          |                       |          | 0.036 |  |  |  |  |  |
| Shft/esd:          |       |          |                       |          | 0.29  |  |  |  |  |  |
| Sc2 moved 0.00A    |       |          | sum(shift/e.s.d)**2 : | 0.08     |       |  |  |  |  |  |

Maximum atom shift: 0.00

Atomic parameter sum(shift/error)\*\*2 for phase 1 : 0.34

Calculated unit cell formula weight: 892.800, density: 4.513gm/cm\*\*3

Atom parameters for phase no. 2

|                     | frac  | x        | y                     | z        | 100*Uiso | 100*U11 | 100*U22 | 100*U33 | 100*U12 | 100*U13 |
|---------------------|-------|----------|-----------------------|----------|----------|---------|---------|---------|---------|---------|
| 100*U23             |       |          |                       |          |          |         |         |         |         |         |
| FE+3 ( 1) Values :  | 0.460 | 0.000000 | 0.000000              | 0.257890 | 0.537    |         |         |         |         |         |
| Sigmas :            |       |          |                       |          | 0.036    |         |         |         |         |         |
| Shft/esd:           |       |          |                       |          | 0.29     |         |         |         |         |         |
| FE+3 ( 1) Moments : |       | 2.670    | 0.000                 | 0.000    | 2.670    | 90.000  | 0.000   |         |         |         |
| Sigmas :            |       | 0.043    |                       |          | 0.043    | 0.000   | 0.000   |         |         |         |
| Shft/esd:           |       | 0.00     |                       |          |          |         |         |         |         |         |
| FE1 moved 0.00A     |       |          | sum(shift/e.s.d)**2 : | 0.08     |          |         |         |         |         |         |
| FE+3 ( 2) Values :  | 0.460 | 0.666670 | 0.333330              | 0.591220 | 0.537    |         |         |         |         |         |
| Sigmas :            |       |          |                       |          | 0.036    |         |         |         |         |         |
| Shft/esd:           |       |          |                       |          | 0.29     |         |         |         |         |         |
| FE+3 ( 2) Moments : |       | 2.670    | 0.000                 | 0.000    | 2.670    | 90.000  | 0.000   |         |         |         |
| Sigmas :            |       | 0.043    |                       |          | 0.043    | 0.000   | 0.000   |         |         |         |
| Shft/esd:           |       | 0.00     |                       |          |          |         |         |         |         |         |
| FE2 moved 0.00A     |       |          | sum(shift/e.s.d)**2 : | 0.08     |          |         |         |         |         |         |
| FE+3 ( 3) Values :  | 0.460 | 0.333330 | 0.666670              | 0.924560 | 0.537    |         |         |         |         |         |
| Sigmas :            |       |          |                       |          | 0.036    |         |         |         |         |         |
| Shft/esd:           |       |          |                       |          | 0.29     |         |         |         |         |         |

|      |             |                       |       |       |       |       |        |       |
|------|-------------|-----------------------|-------|-------|-------|-------|--------|-------|
| FE+3 | ( 3)        | Moments :             | 2.670 | 0.000 | 0.000 | 2.670 | 90.000 | 0.000 |
|      |             | Sigmas :              | 0.043 |       |       | 0.043 | 0.000  | 0.000 |
|      |             | Shft/esd:             | 0.00  |       |       |       |        |       |
| FE3  | moved 0.00A | sum(shift/e.s.d)**2 : |       | 0.08  |       |       |        |       |

1SF0  
Page 39

GENLES Version Win32 Jun 24 14:07:33 2011

|      |             |                       |        |          |          |          |        |         |
|------|-------------|-----------------------|--------|----------|----------|----------|--------|---------|
| FE+3 | ( 5)        | Values :              | 0.460  | 0.666670 | 0.333330 | 0.091220 | 0.537  |         |
|      |             | Sigmas :              |        |          |          |          | 0.036  |         |
|      |             | Shft/esd:             |        |          |          |          | 0.29   |         |
| FE+3 | ( 5)        | Moments :             | -2.670 | 0.000    | 0.000    | 2.670    | 90.000 | 180.000 |
|      |             | Sigmas :              | 0.043  |          |          | 0.043    | 0.000  | 0.000   |
|      |             | Shft/esd:             | 0.00   |          |          |          |        |         |
| FE5  | moved 0.00A | sum(shift/e.s.d)**2 : |        | 0.08     |          |          |        |         |

  

|      |             |                       |        |          |          |          |        |         |
|------|-------------|-----------------------|--------|----------|----------|----------|--------|---------|
| FE+3 | ( 6)        | Values :              | 0.460  | 0.333330 | 0.666670 | 0.424560 | 0.537  |         |
|      |             | Sigmas :              |        |          |          |          | 0.036  |         |
|      |             | Shft/esd:             |        |          |          |          | 0.29   |         |
| FE+3 | ( 6)        | Moments :             | -2.670 | 0.000    | 0.000    | 2.670    | 90.000 | 180.000 |
|      |             | Sigmas :              | 0.043  |          |          | 0.043    | 0.000  | 0.000   |
|      |             | Shft/esd:             | 0.00   |          |          |          |        |         |
| FE6  | moved 0.00A | sum(shift/e.s.d)**2 : |        | 0.08     |          |          |        |         |

  

|      |             |                       |        |          |          |          |        |         |
|------|-------------|-----------------------|--------|----------|----------|----------|--------|---------|
| FE+3 | ( 7)        | Values :              | 0.540  | 0.000000 | 0.000000 | 0.047678 | 0.357  |         |
|      |             | Sigmas :              |        |          |          | 0.000050 | 0.032  |         |
|      |             | Shft/esd:             |        |          |          | -0.06    | -0.28  |         |
| FE+3 | ( 7)        | Moments :             | -2.670 | 0.000    | 0.000    | 2.670    | 90.000 | 180.000 |
|      |             | Sigmas :              | 0.043  |          |          | 0.043    | 0.000  | 0.000   |
|      |             | Shft/esd:             | 0.00   |          |          |          |        |         |
| FE7  | moved 0.00A | sum(shift/e.s.d)**2 : |        | 0.08     |          |          |        |         |

  

|      |             |                       |        |          |          |          |        |         |
|------|-------------|-----------------------|--------|----------|----------|----------|--------|---------|
| FE+3 | ( 8)        | Values :              | 0.540  | 0.666670 | 0.333330 | 0.381008 | 0.357  |         |
|      |             | Sigmas :              |        |          |          | 0.000050 | 0.032  |         |
|      |             | Shft/esd:             |        |          |          | -0.06    | -0.28  |         |
| FE+3 | ( 8)        | Moments :             | -2.670 | 0.000    | 0.000    | 2.670    | 90.000 | 180.000 |
|      |             | Sigmas :              | 0.043  |          |          | 0.043    | 0.000  | 0.000   |
|      |             | Shft/esd:             | 0.00   |          |          |          |        |         |
| FE8  | moved 0.00A | sum(shift/e.s.d)**2 : |        | 0.08     |          |          |        |         |

  

|      |             |                       |        |          |          |          |        |         |
|------|-------------|-----------------------|--------|----------|----------|----------|--------|---------|
| FE+3 | ( 9)        | Values :              | 0.540  | 0.333330 | 0.666670 | 0.714349 | 0.357  |         |
|      |             | Sigmas :              |        |          |          | 0.000050 | 0.032  |         |
|      |             | Shft/esd:             |        |          |          | -0.06    | -0.28  |         |
| FE+3 | ( 9)        | Moments :             | -2.670 | 0.000    | 0.000    | 2.670    | 90.000 | 180.000 |
|      |             | Sigmas :              | 0.043  |          |          | 0.043    | 0.000  | 0.000   |
|      |             | Shft/esd:             | 0.00   |          |          |          |        |         |
| FE9  | moved 0.00A | sum(shift/e.s.d)**2 : |        | 0.08     |          |          |        |         |

1SF0  
Page 40

GENLES Version Win32 Jun 24 14:07:33 2011

|      |             |                       |       |          |          |          |        |       |
|------|-------------|-----------------------|-------|----------|----------|----------|--------|-------|
| FE+3 | ( 10)       | Values :              | 0.540 | 0.000000 | 0.000000 | 0.547679 | 0.357  |       |
|      |             | Sigmas :              |       |          |          | 0.000050 | 0.032  |       |
|      |             | Shft/esd:             |       |          |          | -0.06    | -0.28  |       |
| FE+3 | ( 10)       | Moments :             | 2.670 | 0.000    | 0.000    | 2.670    | 90.000 | 0.000 |
|      |             | Sigmas :              | 0.043 |          |          | 0.043    | 0.000  | 0.000 |
|      |             | Shft/esd:             | 0.00  |          |          |          |        |       |
| FE10 | moved 0.00A | sum(shift/e.s.d)**2 : |       | 0.08     |          |          |        |       |

  

|      |       |          |       |          |          |          |       |  |
|------|-------|----------|-------|----------|----------|----------|-------|--|
| FE+3 | ( 11) | Values : | 0.540 | 0.666670 | 0.333330 | 0.881009 | 0.357 |  |
|      |       | Sigmas : |       |          |          | 0.000050 | 0.032 |  |



Shft/esd: -0.06 -0.28

FE+3 ( 11) Moments : 2.670 0.000 0.000 2.670 90.000 0.000  
 Sigmas : 0.043 0.043 0.000 0.000  
 Shft/esd: 0.00

FE11 moved 0.00A sum(shift/e.s.d)\*\*2 : 0.08

FE+3 ( 12) Values : 0.540 0.333330 0.666670 0.214349 0.357  
 Sigmas : 0.000050 0.032  
 Shft/esd: -0.06 -0.28

FE+3 ( 12) Moments : 2.670 0.000 0.000 2.670 90.000 0.000  
 Sigmas : 0.043 0.043 0.000 0.000  
 Shft/esd: 0.00

FE12 moved 0.00A sum(shift/e.s.d)\*\*2 : 0.08

Maximum atom shift: 0.00  
 Atomic parameter sum(shift/error)\*\*2 for phase 2 : 1.00  
 Calculated unit cell formula weight: 335.082, density: 1.694gm/cm\*\*3

Histogram scale factors:

Histogram: 1 PNT 2 PNT 3 PNT 4 PNT\* 5 PXC\*  
 Scale : 8.77281 8.78039 10.0723 0.00000 0.00000  
 Sigmas : 0.331739E-01 0.300214E-01 0.362630E-01 0.000000 0.000000  
 Shift/esd: 0.03 0.04 0.02 0.00 0.00  
 Histogram scale factor sum(shift/error)\*\*2 : 0.00

Lattice parameters for powder data:

Phase 1

|        | a        | b        | c         | alpha  | beta   | gamma   | volume  |
|--------|----------|----------|-----------|--------|--------|---------|---------|
| Value  | 5.202475 | 5.202475 | 14.014489 | 90.000 | 90.000 | 120.000 | 328.494 |
| Sigmas | 0.000004 | 0.000004 | 0.000114  | 0.000  | 0.000  | 0.000   | 0.003   |

Reciprocal metric tensor shift factor = 100%

Phase 2

|        | a        | b        | c         | alpha  | beta   | gamma   | volume  |
|--------|----------|----------|-----------|--------|--------|---------|---------|
| Value  | 5.202432 | 5.202446 | 14.014500 | 90.000 | 90.000 | 119.999 | 328.494 |
| Sigmas | 0.000007 | 0.000007 | 0.000114  | 0.000  | 0.000  | 0.000   | 0.003   |

Reciprocal metric tensor shift factor = 100%  
 Reciprocal metric tensor sum(shift/error)\*\*2 : 0.00

1SFO GENLES Version Win32 Jun 24 14:07:33 2011  
 Page 41

Diffraction coefficients for powder data:

Histogram : 1 PNT 2 PNT 3 PNT 4 PNT\* 5 PXC\*  
 C/L1/R/2Th: 4569.20 6162.13 2139.59 0.00000 0.00000  
 Sigmas : 0.105502 0.000000 0.153601 0.000000 0.000000  
 Shift/esd : 0.00 0.00 0.00 0.00 0.00  
 Dif A/Pol: -0.970269 -2.51000 1.29550 0.00000 0.00000  
 Sigmas : 0.627774E-01 0.000000 0.698621E-01 0.000000 0.000000  
 Shift/esd : 0.00 0.00 0.00 0.00 0.00  
 Zero : 1.90000 3.85000 9.03000 0.00000 0.00000  
 Sigmas : 0.000000 0.000000 0.000000 0.000000 0.000000  
 Shift/esd : 0.00 0.00 0.00 0.00 0.00  
 Dif. Cons. Sum(shift/error)\*\*2 : 0.00

Profile coefficients for histogram no. 1 and for phase no. 1:

| Coeff.     | alp       | be-0      | be-1      | sg-0      | sg-1      | sg-2      | ga-0      | ga-1      | ga-2      |
|------------|-----------|-----------|-----------|-----------|-----------|-----------|-----------|-----------|-----------|
| gsf        |           |           |           |           |           |           |           |           |           |
| Value      | 2.898E-01 | 5.288E-02 | 7.468E-03 | 0.000E+00 | 2.460E+01 | 2.080E+00 | 0.000E+00 | 3.151E+00 | 0.000E+00 |
| Sigmas     |           |           |           |           | 8.514E-01 |           |           | 1.561E-01 |           |
| Shift/esd: |           |           |           |           | 0.00      |           |           | 0.00      |           |
| Coeff.     | g1ec      | g2ec      | rstr      | rsta      | rscs      | L11       | L22       | L33       | L12       |
| L13        |           |           |           |           |           |           |           |           |           |
| Value      | 0.000E+00 |
| Sigmas     |           |           |           |           |           |           |           |           |           |
| Shift/esd: |           |           |           |           |           |           |           |           |           |
| Coeff.     | L23       |           |           |           |           |           |           |           |           |
| Value      | 0.000E+00 |           |           |           |           |           |           |           |           |
| Sigmas     |           |           |           |           |           |           |           |           |           |
| Shift/esd: |           |           |           |           |           |           |           |           |           |

Profile coefficients for histogram no. 2 and for phase no. 1:

Coeff. : alp be-0 be-1 sg-0 sg-1 sg-2 ga-0 ga-1 ga-2  
gsf  
Value : 4.108E+00 6.789E-02 2.857E-03 3.543E+00 4.379E+01 -1.859E+00 0.000E+00 4.543E-02 1.628E+00  
0.000E+00  
Sigmas : 7.583E-01 1.182E-01  
Shift/esd: 0.00 0.00  
Coeff. : g1ec g2ec rstr rsta rsca L11 L22 L33 L12  
L13  
Value : 0.000E+00 0.000E+00 0.000E+00 0.000E+00 0.000E+00 0.000E+00 0.000E+00 0.000E+00 0.000E+00  
0.000E+00  
Sigmas :  
Shift/esd:  
Coeff. : L23  
Value : 0.000E+00  
Sigmas :  
Shift/esd:

Profile coefficients for histogram no. 3 and for phase no. 1:  
Coeff. : alp be-0 be-1 sg-0 sg-1 sg-2 ga-0 ga-1 ga-2  
gsf  
Value : 1.000E+00 5.279E-02 2.026E-01 2.192E+01 7.865E+01 1.284E+00 0.000E+00 0.000E+00 0.000E+00  
0.000E+00  
Sigmas : 8.469E-01  
Shift/esd: 0.00  
Coeff. : g1ec g2ec rstr rsta rsca L11 L22 L33 L12  
L13  
Value : 0.000E+00 0.000E+00 0.000E+00 0.000E+00 0.000E+00 0.000E+00 0.000E+00 0.000E+00 0.000E+00  
0.000E+00  
Sigmas :  
Shift/esd:  
Coeff. : L23  
Value : 0.000E+00  
Sigmas :  
Shift/esd:

Profile coefficients for histogram no. 1 and for phase no. 2:  
Coeff. : alp be-0 be-1 sg-0 sg-1 sg-2 ga-0 ga-1 ga-2  
gsf  
Value : 2.898E-01 5.288E-02 7.468E-03 0.000E+00 2.460E+01 2.080E+00 0.000E+00 3.151E+00 0.000E+00  
0.000E+00  
Sigmas : 8.514E-01 1.561E-01  
Shift/esd: 0.00 0.00  
Coeff. : g1ec g2ec rstr rsta rsca L11 L22 L33 L12  
L13  
Value : 0.000E+00 0.000E+00 0.000E+00 0.000E+00 0.000E+00 0.000E+00 0.000E+00 0.000E+00 0.000E+00  
0.000E+00  
Sigmas :  
Shift/esd:  
Coeff. : L23  
Value : 0.000E+00  
Sigmas :  
Shift/esd:

Profile coefficients for histogram no. 2 and for phase no. 2:  
Coeff. : alp be-0 be-1 sg-0 sg-1 sg-2 ga-0 ga-1 ga-2  
gsf  
Value : 4.108E+00 6.789E-02 2.857E-03 3.543E+00 4.379E+01 -1.859E+00 0.000E+00 4.543E-02 1.628E+00  
0.000E+00  
Sigmas : 7.583E-01 1.182E-01  
Shift/esd: 0.00 0.00  
Coeff. : g1ec g2ec rstr rsta rsca L11 L22 L33 L12  
L13  
Value : 0.000E+00 0.000E+00 0.000E+00 0.000E+00 0.000E+00 0.000E+00 0.000E+00 0.000E+00 0.000E+00  
0.000E+00  
Sigmas :  
Shift/esd:  
Coeff. : L23  
Value : 0.000E+00  
Sigmas :  
Shift/esd:

Profile coefficients for histogram no. 3 and for phase no. 2:  
Coeff. : alp be-0 be-1 sg-0 sg-1 sg-2 ga-0 ga-1 ga-2

gsf  
 Value : 1.000E+00 5.279E-02 2.026E-01 2.192E+01 7.865E+01 1.284E+00 0.000E+00 0.000E+00 0.000E+00  
 0.000E+00  
 Sigmas : 8.469E-01  
 Shift/esd: 0.00  
 Coeff. : g1ec g2ec rstr rsta rsca L11 L22 L33 L12

L13  
 Value : 0.000E+00 0.000E+00 0.000E+00 0.000E+00 0.000E+00 0.000E+00 0.000E+00 0.000E+00 0.000E+00  
 0.000E+00  
 Sigmas :  
 Shift/esd:  
 Coeff. : L23  
 Value : 0.000E+00  
 Sigmas :  
 Shift/esd:  
 Profile coef. sum(shift/error)\*\*2 : 0.00

Background coefficients for histogram no. 1:  
 Param. : 1 2 3 4 5 6  
 Coeff. : 3.304023E-01 -1.781683E-02 5.273972E-02 -1.853761E-02 -9.857190E-03 -3.958889E-02  
 Sigmas : 4.614026E-03 8.661845E-03 7.903988E-03 7.311811E-03 6.852502E-03 6.160600E-03  
 Shift/esd: 0.00 0.00 0.00 0.00 0.00 0.00  
 Param. : 7 8 9  
 Coeff. : -1.856144E-02 -1.532744E-02 -7.147302E-03  
 Sigmas : 5.221894E-03 3.640610E-03 1.897042E-03  
 Shift/esd: -0.01 0.00 -0.01  
 1SF0 GENLES Version Win32 Jun 24 14:07:33 2011  
 Page 43

Background coefficients for histogram no. 2:  
 Param. : 1 2 3 4 5 6  
 Coeff. : 2.736536E-01 -9.805645E-02 9.470975E-03 -1.770705E-02 1.123059E-02 -8.159879E-03  
 Sigmas : 2.500180E-03 4.625460E-03 4.215688E-03 3.985947E-03 3.837672E-03 3.726899E-03  
 Shift/esd: 0.00 0.00 -0.01 0.00 0.00 0.00  
 Param. : 7 8 9 10 11 12  
 Coeff. : 1.322849E-04 -1.502200E-02 -7.048016E-03 1.803728E-03 3.517767E-03 -1.698280E-02  
 Sigmas : 3.603150E-03 3.500139E-03 3.258474E-03 2.870663E-03 2.146260E-03 1.151819E-03  
 Shift/esd: 0.00 -0.01 -0.01 -0.01 -0.01 -0.02  
 Background coef. sum(shift/error)\*\*2 : 0.00  
 CPU times for matrix build 1.66 sec; matrix inversion 0.03 sec  
 Final variable sum((shift/esd)\*\*2) for cycle1161: 0.18 Time: 1.69 sec  
 1SF0 GENLES Version Win32 Jun 24 14:07:33 2011  
 Page 44

Restraint data statistics:  
 No restraints used

| Powder data statistics |      |       | Fitted      |        | -Bknd  |        | pFree  |        |        | Average |     |          |       |
|------------------------|------|-------|-------------|--------|--------|--------|--------|--------|--------|---------|-----|----------|-------|
|                        | Bank | Ndata | Sum(w*d**2) | wRp    | Rp     | wRp    | Rp     | wRp    | Rp     | Npfree  | DWd | Integral |       |
| Hstgm 1                | PNT  | 1     | 4524        | 4592.5 | 0.0694 | 0.1159 | 3.0072 | 0.6136 | 0.0000 | 0.0000  | 0   | 0.658    | 0.982 |
| Hstgm 2                | PNT  | 2     | 3753        | 4940.8 | 0.0449 | 0.0945 | 0.1091 | 0.1135 | 0.0000 | 0.0000  | 0   | 0.462    | 0.990 |
| Hstgm 3                | PNT  | 3     | 4808        | 4303.1 | 0.1278 | 0.1742 | 3.2083 | 0.7146 | 0.0000 | 0.0000  | 0   | 0.732    | 0.997 |
| Powder totals          |      | 13085 | 13836.      |        | 0.0614 | 0.1237 | 1.9002 | 0.4462 | 0.0000 | 0.0000  | 0   | 0.611    |       |

No serial correlation in fit at 90% confidence for 1.952 < DWd < 2.048  
 Cycle1162 There were 13085 observations.  
 Total before-cycle CHI\*\*2 (offset/sig) = 1.3836E+04 ( 4.9187E+00)  
 Reduced CHI\*\*2 = 1.061 for 43 variables

Reflection data statistics  
 Histogram 1 Type PNT Nobs = 1302 R(F\*\*2) = 0.1148  
 Histogram 2 Type PNT Nobs = 1071 R(F\*\*2) = 0.0982  
 Histogram 3 Type PNT Nobs = 857 R(F\*\*2) = 0.0805  
 After matrix normalization and Marquardt modification:

1 Columns of the 43 Column matrix are 0.0  
 Full matrix recip. condition value & -log10 = 0.2035E-03 3.69  
 Variable NoVarabl was not refined

The value of the determinant is 1.3026\*10.0\*\*( -22)

Atom parameters for phase no. 1  
 frac x y z 100\*Uiso 100\*U11 100\*U22 100\*U33 100\*U12 100\*U13

100\*U23

SC+3 ( 1) Values : 0.460 0.000000 0.000000 0.047680 0.364  
 Sigmas : 0.000050 0.032  
 Shft/esd: 0.05 0.21  
 Sc1 moved 0.00A sum(shift/e.s.d)\*\*2 : 0.05

FE+3 ( 2) Values : 0.460 0.000000 0.000000 0.257903 0.529  
 Sigmas : 0.035  
 Shft/esd: -0.21  
 Fe1 moved 0.00A sum(shift/e.s.d)\*\*2 : 0.05

0 ( 3) Values : 1.000 0.342326 -0.026073 0.817571 0.486  
 Sigmas : 0.000389 0.000228 0.000227 0.010  
 Shft/esd: 0.01 0.00 -0.06 -0.03  
 01 moved 0.00A sum(shift/e.s.d)\*\*2 : 0.00

FE+3 ( 4) Values : 0.540 0.000000 0.000000 0.047680 0.364  
 Sigmas : 0.000050 0.032  
 Shft/esd: 0.05 0.21  
 Fe2 moved 0.00A sum(shift/e.s.d)\*\*2 : 0.05

1SF0  
 Page 45

GENLES Version Win32 Jun 24 14:07:35 2011

SC+3 ( 5) Values : 0.540 0.000000 0.000000 0.257903 0.529  
 Sigmas : 0.035  
 Shft/esd: -0.21  
 Sc2 moved 0.00A sum(shift/e.s.d)\*\*2 : 0.05

Maximum atom shift: 0.00  
 Atomic parameter sum(shift/error)\*\*2 for phase 1 : 0.19  
 Calculated unit cell formula weight: 892.800, density: 4.513gm/cm\*\*3

Atom parameters for phase no. 2

|                   | frac  | x        | y        | z        | 100*Uiso | 100*U11 | 100*U22 | 100*U33 | 100*U12 | 100*U13                    |
|-------------------|-------|----------|----------|----------|----------|---------|---------|---------|---------|----------------------------|
| 100*U23           |       |          |          |          |          |         |         |         |         |                            |
| FE+3 ( 1) Values  | 0.460 | 0.000000 | 0.000000 | 0.257890 | 0.529    |         |         |         |         |                            |
| Sigmas            |       |          |          |          | 0.035    |         |         |         |         |                            |
| Shft/esd:         |       |          |          |          | -0.21    |         |         |         |         |                            |
| FE+3 ( 1) Moments |       | 2.670    | 0.000    | 0.000    | 2.670    | 90.000  | 0.000   |         |         |                            |
| Sigmas            |       | 0.043    |          |          | 0.043    | 0.000   | 0.000   |         |         |                            |
| Shft/esd:         |       | 0.00     |          |          |          |         |         |         |         |                            |
| FE1 moved 0.00A   |       |          |          |          |          |         |         |         |         | sum(shift/e.s.d)**2 : 0.05 |
| FE+3 ( 2) Values  | 0.460 | 0.666670 | 0.333330 | 0.591220 | 0.529    |         |         |         |         |                            |
| Sigmas            |       |          |          |          | 0.035    |         |         |         |         |                            |
| Shft/esd:         |       |          |          |          | -0.21    |         |         |         |         |                            |
| FE+3 ( 2) Moments |       | 2.670    | 0.000    | 0.000    | 2.670    | 90.000  | 0.000   |         |         |                            |
| Sigmas            |       | 0.043    |          |          | 0.043    | 0.000   | 0.000   |         |         |                            |
| Shft/esd:         |       | 0.00     |          |          |          |         |         |         |         |                            |
| FE2 moved 0.00A   |       |          |          |          |          |         |         |         |         | sum(shift/e.s.d)**2 : 0.05 |
| FE+3 ( 3) Values  | 0.460 | 0.333330 | 0.666670 | 0.924560 | 0.529    |         |         |         |         |                            |
| Sigmas            |       |          |          |          | 0.035    |         |         |         |         |                            |
| Shft/esd:         |       |          |          |          | -0.21    |         |         |         |         |                            |
| FE+3 ( 3) Moments |       | 2.670    | 0.000    | 0.000    | 2.670    | 90.000  | 0.000   |         |         |                            |
| Sigmas            |       | 0.043    |          |          | 0.043    | 0.000   | 0.000   |         |         |                            |
| Shft/esd:         |       | 0.00     |          |          |          |         |         |         |         |                            |
| FE3 moved 0.00A   |       |          |          |          |          |         |         |         |         | sum(shift/e.s.d)**2 : 0.05 |
| FE+3 ( 4) Values  | 0.460 | 0.000000 | 0.000000 | 0.757890 | 0.529    |         |         |         |         |                            |
| Sigmas            |       |          |          |          | 0.035    |         |         |         |         |                            |
| Shft/esd:         |       |          |          |          | -0.21    |         |         |         |         |                            |
| FE+3 ( 4) Moments |       | -2.670   | 0.000    | 0.000    | 2.670    | 90.000  | 180.000 |         |         |                            |
| Sigmas            |       | 0.043    |          |          | 0.043    | 0.000   | 0.000   |         |         |                            |
| Shft/esd:         |       | 0.00     |          |          |          |         |         |         |         |                            |
| FE4 moved 0.00A   |       |          |          |          |          |         |         |         |         | sum(shift/e.s.d)**2 : 0.05 |

1SF0  
 Page 46

GENLES Version Win32 Jun 24 14:07:35 2011

|      |             |                       |        |          |          |          |        |         |  |
|------|-------------|-----------------------|--------|----------|----------|----------|--------|---------|--|
| FE+3 | ( 5)        | Values :              | 0.460  | 0.666670 | 0.333330 | 0.091220 | 0.529  |         |  |
|      |             | Sigmas :              |        |          |          |          | 0.035  |         |  |
|      |             | Shft/esd:             |        |          |          |          | -0.21  |         |  |
| FE+3 | ( 5)        | Moments :             | -2.670 | 0.000    | 0.000    | 2.670    | 90.000 | 180.000 |  |
|      |             | Sigmas :              | 0.043  |          |          | 0.043    | 0.000  | 0.000   |  |
|      |             | Shft/esd:             | 0.00   |          |          |          |        |         |  |
| FE5  | moved 0.00A | sum(shift/e.s.d)**2 : | 0.05   |          |          |          |        |         |  |
| FE+3 | ( 6)        | Values :              | 0.460  | 0.333330 | 0.666670 | 0.424560 | 0.529  |         |  |
|      |             | Sigmas :              |        |          |          |          | 0.035  |         |  |
|      |             | Shft/esd:             |        |          |          |          | -0.21  |         |  |
| FE+3 | ( 6)        | Moments :             | -2.670 | 0.000    | 0.000    | 2.670    | 90.000 | 180.000 |  |
|      |             | Sigmas :              | 0.043  |          |          | 0.043    | 0.000  | 0.000   |  |
|      |             | Shft/esd:             | 0.00   |          |          |          |        |         |  |
| FE6  | moved 0.00A | sum(shift/e.s.d)**2 : | 0.05   |          |          |          |        |         |  |
| FE+3 | ( 7)        | Values :              | 0.540  | 0.000000 | 0.000000 | 0.047680 | 0.364  |         |  |
|      |             | Sigmas :              |        |          |          | 0.000050 | 0.032  |         |  |
|      |             | Shft/esd:             |        |          |          | 0.05     | 0.21   |         |  |
| FE+3 | ( 7)        | Moments :             | -2.670 | 0.000    | 0.000    | 2.670    | 90.000 | 180.000 |  |
|      |             | Sigmas :              | 0.043  |          |          | 0.043    | 0.000  | 0.000   |  |
|      |             | Shft/esd:             | 0.00   |          |          |          |        |         |  |
| FE7  | moved 0.00A | sum(shift/e.s.d)**2 : | 0.05   |          |          |          |        |         |  |
| FE+3 | ( 8)        | Values :              | 0.540  | 0.666670 | 0.333330 | 0.381010 | 0.364  |         |  |
|      |             | Sigmas :              |        |          |          | 0.000050 | 0.032  |         |  |
|      |             | Shft/esd:             |        |          |          | 0.05     | 0.21   |         |  |
| FE+3 | ( 8)        | Moments :             | -2.670 | 0.000    | 0.000    | 2.670    | 90.000 | 180.000 |  |
|      |             | Sigmas :              | 0.043  |          |          | 0.043    | 0.000  | 0.000   |  |
|      |             | Shft/esd:             | 0.00   |          |          |          |        |         |  |
| FE8  | moved 0.00A | sum(shift/e.s.d)**2 : | 0.05   |          |          |          |        |         |  |
| FE+3 | ( 9)        | Values :              | 0.540  | 0.333330 | 0.666670 | 0.714351 | 0.364  |         |  |
|      |             | Sigmas :              |        |          |          | 0.000050 | 0.032  |         |  |
|      |             | Shft/esd:             |        |          |          | 0.05     | 0.21   |         |  |
| FE+3 | ( 9)        | Moments :             | -2.670 | 0.000    | 0.000    | 2.670    | 90.000 | 180.000 |  |
|      |             | Sigmas :              | 0.043  |          |          | 0.043    | 0.000  | 0.000   |  |
|      |             | Shft/esd:             | 0.00   |          |          |          |        |         |  |
| FE9  | moved 0.00A | sum(shift/e.s.d)**2 : | 0.05   |          |          |          |        |         |  |



Profile coefficients for histogram no. 3 and for phase no. 1:

| Coeff.     | alp       | be-0      | be-1      | sg-0      | sg-1      | sg-2      | ga-0      | ga-1      | ga-2      |
|------------|-----------|-----------|-----------|-----------|-----------|-----------|-----------|-----------|-----------|
| Value      | 1.000E+00 | 5.279E-02 | 2.026E-01 | 2.192E+01 | 7.865E+01 | 1.284E+00 | 0.000E+00 | 0.000E+00 | 0.000E+00 |
| Sigmas     |           |           |           |           | 8.469E-01 |           |           |           |           |
| Shift/esd: |           |           |           |           | 0.00      |           |           |           |           |
| Coeff.     | g1ec      | g2ec      | rstr      | rsta      | rsc       | L11       | L22       | L33       | L12       |
| L13        |           |           |           |           |           |           |           |           |           |
| Value      | 0.000E+00 |
| Sigmas     |           |           |           |           |           |           |           |           |           |
| Shift/esd: |           |           |           |           |           |           |           |           |           |
| Coeff.     | L23       |           |           |           |           |           |           |           |           |
| Value      | 0.000E+00 |           |           |           |           |           |           |           |           |
| Sigmas     |           |           |           |           |           |           |           |           |           |
| Shift/esd: |           |           |           |           |           |           |           |           |           |

1SF0 GENLES Version Win32 Jun 24 14:07:35 2011  
Page 49

Profile coefficients for histogram no. 1 and for phase no. 2:

| Coeff.     | alp       | be-0      | be-1      | sg-0      | sg-1      | sg-2      | ga-0      | ga-1      | ga-2      |
|------------|-----------|-----------|-----------|-----------|-----------|-----------|-----------|-----------|-----------|
| Value      | 2.898E-01 | 5.288E-02 | 7.468E-03 | 0.000E+00 | 2.460E+01 | 2.080E+00 | 0.000E+00 | 3.151E+00 | 0.000E+00 |
| Sigmas     |           |           |           |           | 8.514E-01 |           |           | 1.560E-01 |           |
| Shift/esd: |           |           |           |           | 0.00      |           |           | 0.00      |           |
| Coeff.     | g1ec      | g2ec      | rstr      | rsta      | rsc       | L11       | L22       | L33       | L12       |
| L13        |           |           |           |           |           |           |           |           |           |
| Value      | 0.000E+00 |
| Sigmas     |           |           |           |           |           |           |           |           |           |
| Shift/esd: |           |           |           |           |           |           |           |           |           |
| Coeff.     | L23       |           |           |           |           |           |           |           |           |
| Value      | 0.000E+00 |           |           |           |           |           |           |           |           |
| Sigmas     |           |           |           |           |           |           |           |           |           |
| Shift/esd: |           |           |           |           |           |           |           |           |           |

Profile coefficients for histogram no. 2 and for phase no. 2:

| Coeff.     | alp       | be-0      | be-1      | sg-0      | sg-1      | sg-2       | ga-0      | ga-1      | ga-2      |
|------------|-----------|-----------|-----------|-----------|-----------|------------|-----------|-----------|-----------|
| Value      | 4.108E+00 | 6.789E-02 | 2.857E-03 | 3.543E+00 | 4.379E+01 | -1.859E+00 | 0.000E+00 | 4.552E-02 | 1.628E+00 |
| Sigmas     |           |           |           |           | 7.582E-01 |            |           | 1.182E-01 |           |
| Shift/esd: |           |           |           |           | 0.00      |            |           | 0.00      |           |
| Coeff.     | g1ec      | g2ec      | rstr      | rsta      | rsc       | L11        | L22       | L33       | L12       |
| L13        |           |           |           |           |           |            |           |           |           |
| Value      | 0.000E+00 | 0.000E+00 | 0.000E+00 | 0.000E+00 | 0.000E+00 | 0.000E+00  | 0.000E+00 | 0.000E+00 | 0.000E+00 |
| Sigmas     |           |           |           |           |           |            |           |           |           |
| Shift/esd: |           |           |           |           |           |            |           |           |           |
| Coeff.     | L23       |           |           |           |           |            |           |           |           |
| Value      | 0.000E+00 |           |           |           |           |            |           |           |           |
| Sigmas     |           |           |           |           |           |            |           |           |           |
| Shift/esd: |           |           |           |           |           |            |           |           |           |

Profile coefficients for histogram no. 3 and for phase no. 2:

| Coeff.     | alp       | be-0      | be-1      | sg-0      | sg-1      | sg-2      | ga-0      | ga-1      | ga-2      |
|------------|-----------|-----------|-----------|-----------|-----------|-----------|-----------|-----------|-----------|
| Value      | 1.000E+00 | 5.279E-02 | 2.026E-01 | 2.192E+01 | 7.865E+01 | 1.284E+00 | 0.000E+00 | 0.000E+00 | 0.000E+00 |
| Sigmas     |           |           |           |           | 8.469E-01 |           |           |           |           |
| Shift/esd: |           |           |           |           | 0.00      |           |           |           |           |
| Coeff.     | g1ec      | g2ec      | rstr      | rsta      | rsc       | L11       | L22       | L33       | L12       |
| L13        |           |           |           |           |           |           |           |           |           |
| Value      | 0.000E+00 |
| Sigmas     |           |           |           |           |           |           |           |           |           |
| Shift/esd: |           |           |           |           |           |           |           |           |           |
| Coeff.     | L23       |           |           |           |           |           |           |           |           |
| Value      | 0.000E+00 |           |           |           |           |           |           |           |           |
| Sigmas     |           |           |           |           |           |           |           |           |           |
| Shift/esd: |           |           |           |           |           |           |           |           |           |

Profile coef. sum(shift/error)\*\*2 : 0.00

Background coefficients for histogram no. 1:

|            |               |               |               |               |               |               |
|------------|---------------|---------------|---------------|---------------|---------------|---------------|
| Param. :   | 1             | 2             | 3             | 4             | 5             | 6             |
| Coeff. :   | 3.304123E-01  | -1.782618E-02 | 5.276417E-02  | -1.854789E-02 | -9.835359E-03 | -3.959241E-02 |
| Sigmas :   | 4.614038E-03  | 8.661773E-03  | 7.904032E-03  | 7.311805E-03  | 6.852603E-03  | 6.160611E-03  |
| Shift/esd: | 0.00          | 0.00          | 0.00          | 0.00          | 0.00          | 0.00          |
| Param. :   | 7             | 8             | 9             |               |               |               |
| Coeff. :   | -1.854025E-02 | -1.532352E-02 | -7.139436E-03 |               |               |               |
| Sigmas :   | 5.221992E-03  | 3.640604E-03  | 1.897094E-03  |               |               |               |
| Shift/esd: | 0.00          | 0.00          | 0.00          |               |               |               |

1SF0

GENLES Version Win32 Jun 24 14:07:35 2011

Page 50

Background coefficients for histogram no. 2:

|                                        |              |               |               |               |              |               |
|----------------------------------------|--------------|---------------|---------------|---------------|--------------|---------------|
| Param. :                               | 1            | 2             | 3             | 4             | 5            | 6             |
| Coeff. :                               | 2.736598E-01 | -9.805781E-02 | 9.486720E-03  | -1.770797E-02 | 1.124194E-02 | -8.159674E-03 |
| Sigmas :                               | 2.500237E-03 | 4.625451E-03  | 4.215770E-03  | 3.985937E-03  | 3.837719E-03 | 3.726863E-03  |
| Shift/esd:                             | 0.00         | 0.00          | 0.00          | 0.00          | 0.00         | 0.00          |
| Param. :                               | 7            | 8             | 9             | 10            | 11           | 12            |
| Coeff. :                               | 1.406928E-04 | -1.500917E-02 | -7.035227E-03 | 1.817594E-03  | 3.531192E-03 | -1.696704E-02 |
| Sigmas :                               | 3.603154E-03 | 3.500098E-03  | 3.258470E-03  | 2.870660E-03  | 2.146295E-03 | 1.151934E-03  |
| Shift/esd:                             | 0.00         | 0.00          | 0.00          | 0.00          | 0.01         | 0.01          |
| Background coef. sum(shift/error)**2 : |              |               | 0.00          |               |              |               |

CPU times for matrix build 1.56 sec; matrix inversion 0.00 sec

Final variable sum((shift/esd)\*\*2) for cycle1162: 0.10 Time: 1.56 sec

1SF0

GENLES Version Win32 Jun 24 14:07:35 2011

Page 51

Restraint data statistics:

No restraints used

| Powder data statistics |            | Fitted      |        | -Bknd  |        | pFree  |        | Average |        |     |          |       |
|------------------------|------------|-------------|--------|--------|--------|--------|--------|---------|--------|-----|----------|-------|
|                        | Bank Ndata | Sum(w*d**2) | wRp    | Rp     | wRp    | Rp     | wRp    | Rp      | Npfree | DWd | Integral |       |
| Hstgm 1                | PNT 1      | 4524        | 4592.7 | 0.0694 | 0.1159 | 3.0075 | 0.6137 | 0.0000  | 0.0000 | 0   | 0.658    | 0.982 |
| Hstgm 2                | PNT 2      | 3753        | 4940.9 | 0.0449 | 0.0945 | 0.1091 | 0.1135 | 0.0000  | 0.0000 | 0   | 0.462    | 0.990 |
| Hstgm 3                | PNT 3      | 4808        | 4302.9 | 0.1278 | 0.1742 | 3.2083 | 0.7146 | 0.0000  | 0.0000 | 0   | 0.733    | 0.997 |
| Powder totals          |            | 13085       | 13836. | 0.0614 | 0.1237 | 1.9003 | 0.4462 | 0.0000  | 0.0000 | 0   | 0.611    |       |

No serial correlation in fit at 90% confidence for 1.952 < DWd < 2.048

Cycle1163 There were 13085 observations.

Total before-cycle CHI\*\*2 (offset/sig) = 1.3836E+04 ( 4.9187E+00)

Reduced CHI\*\*2 = 1.061 for 43 variables

Reflection data statistics

Histogram 1 Type PNT Nobs = 1302 R(F\*\*2) = 0.1148

Histogram 2 Type PNT Nobs = 1071 R(F\*\*2) = 0.0982

Histogram 3 Type PNT Nobs = 857 R(F\*\*2) = 0.0805

After matrix normalization and Marquardt modification:

1 Columns of the 43 Column matrix are 0.0

Full matrix recip. condition value & -log10 = 0.2036E-03 3.69

Variable NoVarabl was not refined

The value of the determinant is 1.2832\*10.0\*\*( -22)

Atom parameters for phase no. 1

|           | frac        | x     | y                     | z         | 100*Uiso | 100*U11 | 100*U22 | 100*U33 | 100*U12 | 100*U13 |
|-----------|-------------|-------|-----------------------|-----------|----------|---------|---------|---------|---------|---------|
| 100*U23   |             |       |                       |           |          |         |         |         |         |         |
| SC+3 ( 1) | Values :    | 0.460 | 0.000000              | 0.000000  | 0.047678 | 0.359   |         |         |         |         |
|           | Sigmas :    |       |                       |           | 0.000050 | 0.032   |         |         |         |         |
|           | Shft/esd:   |       |                       |           | -0.03    | -0.15   |         |         |         |         |
| Sc1       | moved 0.00A |       | sum(shift/e.s.d)**2 : | 0.02      |          |         |         |         |         |         |
| FE+3 ( 2) | Values :    | 0.460 | 0.000000              | 0.000000  | 0.257903 | 0.535   |         |         |         |         |
|           | Sigmas :    |       |                       |           |          | 0.036   |         |         |         |         |
|           | Shft/esd:   |       |                       |           |          | 0.16    |         |         |         |         |
| Fe1       | moved 0.00A |       | sum(shift/e.s.d)**2 : | 0.02      |          |         |         |         |         |         |
| 0 ( 3)    | Values :    | 1.000 | 0.342324              | -0.026074 | 0.817581 | 0.486   |         |         |         |         |
|           | Sigmas :    |       | 0.000389              | 0.000227  | 0.000226 | 0.010   |         |         |         |         |
|           | Shft/esd:   |       | -0.01                 | 0.00      | 0.04     | 0.03    |         |         |         |         |
| 01        | moved 0.00A |       | sum(shift/e.s.d)**2 : | 0.00      |          |         |         |         |         |         |
| FE+3 ( 4) | Values :    | 0.540 | 0.000000              | 0.000000  | 0.047678 | 0.359   |         |         |         |         |



Sigmas : 0.000050 0.032  
 Shft/esd: -0.03 -0.15  
 Fe2 moved 0.00A sum(shift/e.s.d)\*\*2 : 0.02

1SF0  
Page 52

GENLES Version Win32 Jun 24 14:07:37 2011

SC+3 ( 5) Values : 0.540 0.000000 0.000000 0.257903 0.535  
 Sigmas : 0.036  
 Shft/esd: 0.16  
 Sc2 moved 0.00A sum(shift/e.s.d)\*\*2 : 0.02

Maximum atom shift: 0.00  
 Atomic parameter sum(shift/error)\*\*2 for phase 1 : 0.10  
 Calculated unit cell formula weight: 892.800, density: 4.513gm/cm\*\*3

Atom parameters for phase no. 2

|           | frac        | x       | y                     | z        | 100*Uiso | 100*U11 | 100*U22 | 100*U33 | 100*U12 | 100*U13 |
|-----------|-------------|---------|-----------------------|----------|----------|---------|---------|---------|---------|---------|
| 100*U23   |             |         |                       |          |          |         |         |         |         |         |
|           |             | Mx      | My                    | Mz       | IMomentI | Theta   | Psi     |         |         |         |
| FE+3 ( 1) | Values      | : 0.460 | 0.000000              | 0.000000 | 0.257890 | 0.535   |         |         |         |         |
|           | Sigmas      | :       |                       |          |          | 0.036   |         |         |         |         |
|           | Shft/esd:   |         |                       |          |          | 0.16    |         |         |         |         |
| FE+3 ( 1) | Moments     | :       | 2.670                 | 0.000    | 0.000    | 2.670   | 90.000  | 0.000   |         |         |
|           | Sigmas      | :       | 0.043                 |          |          | 0.043   | 0.000   | 0.000   |         |         |
|           | Shft/esd:   |         | 0.00                  |          |          |         |         |         |         |         |
| FE1       | moved 0.00A |         | sum(shift/e.s.d)**2 : | 0.02     |          |         |         |         |         |         |
| FE+3 ( 2) | Values      | : 0.460 | 0.666670              | 0.333330 | 0.591220 | 0.535   |         |         |         |         |
|           | Sigmas      | :       |                       |          |          | 0.036   |         |         |         |         |
|           | Shft/esd:   |         |                       |          |          | 0.16    |         |         |         |         |
| FE+3 ( 2) | Moments     | :       | 2.670                 | 0.000    | 0.000    | 2.670   | 90.000  | 0.000   |         |         |
|           | Sigmas      | :       | 0.043                 |          |          | 0.043   | 0.000   | 0.000   |         |         |
|           | Shft/esd:   |         | 0.00                  |          |          |         |         |         |         |         |
| FE2       | moved 0.00A |         | sum(shift/e.s.d)**2 : | 0.02     |          |         |         |         |         |         |
| FE+3 ( 3) | Values      | : 0.460 | 0.333330              | 0.666670 | 0.924560 | 0.535   |         |         |         |         |
|           | Sigmas      | :       |                       |          |          | 0.036   |         |         |         |         |
|           | Shft/esd:   |         |                       |          |          | 0.16    |         |         |         |         |
| FE+3 ( 3) | Moments     | :       | 2.670                 | 0.000    | 0.000    | 2.670   | 90.000  | 0.000   |         |         |
|           | Sigmas      | :       | 0.043                 |          |          | 0.043   | 0.000   | 0.000   |         |         |
|           | Shft/esd:   |         | 0.00                  |          |          |         |         |         |         |         |
| FE3       | moved 0.00A |         | sum(shift/e.s.d)**2 : | 0.02     |          |         |         |         |         |         |
| FE+3 ( 4) | Values      | : 0.460 | 0.000000              | 0.000000 | 0.757890 | 0.535   |         |         |         |         |
|           | Sigmas      | :       |                       |          |          | 0.036   |         |         |         |         |
|           | Shft/esd:   |         |                       |          |          | 0.16    |         |         |         |         |
| FE+3 ( 4) | Moments     | :       | -2.670                | 0.000    | 0.000    | 2.670   | 90.000  | 180.000 |         |         |
|           | Sigmas      | :       | 0.043                 |          |          | 0.043   | 0.000   | 0.000   |         |         |
|           | Shft/esd:   |         | 0.00                  |          |          |         |         |         |         |         |
| FE4       | moved 0.00A |         | sum(shift/e.s.d)**2 : | 0.02     |          |         |         |         |         |         |

1SF0  
Page 53

GENLES Version Win32 Jun 24 14:07:37 2011

FE+3 ( 5) Values : 0.460 0.666670 0.333330 0.091220 0.535  
 Sigmas : 0.036  
 Shft/esd: 0.16  
 FE+3 ( 5) Moments : -2.670 0.000 0.000 2.670 90.000 180.000  
 Sigmas : 0.043 0.000 0.000  
 Shft/esd: 0.00  
 FE5 moved 0.00A sum(shift/e.s.d)\*\*2 : 0.02  
 FE+3 ( 6) Values : 0.460 0.333330 0.666670 0.424560 0.535  
 Sigmas : 0.036  
 Shft/esd: 0.16  
 FE+3 ( 6) Moments : -2.670 0.000 0.000 2.670 90.000 180.000  
 Sigmas : 0.043 0.000 0.000  
 Shft/esd: 0.00  
 FE6 moved 0.00A sum(shift/e.s.d)\*\*2 : 0.02

FE+3 ( 7) Values : 0.540 0.000000 0.000000 0.047678 0.359  
 Sigmas : 0.000050 0.032  
 Shft/esd: -0.03 -0.15

FE+3 ( 7) Moments : -2.670 0.000 0.000 2.670 90.000 180.000  
 Sigmas : 0.043 0.043 0.000 0.000  
 Shft/esd: 0.00

FE7 moved 0.00A sum(shift/e.s.d)\*\*2 : 0.02

FE+3 ( 8) Values : 0.540 0.666670 0.333330 0.381008 0.359  
 Sigmas : 0.000050 0.032  
 Shft/esd: -0.03 -0.15

FE+3 ( 8) Moments : -2.670 0.000 0.000 2.670 90.000 180.000  
 Sigmas : 0.043 0.043 0.000 0.000  
 Shft/esd: 0.00

FE8 moved 0.00A sum(shift/e.s.d)\*\*2 : 0.02

FE+3 ( 9) Values : 0.540 0.333330 0.666670 0.714349 0.359  
 Sigmas : 0.000050 0.032  
 Shft/esd: -0.03 -0.15

FE+3 ( 9) Moments : -2.670 0.000 0.000 2.670 90.000 180.000  
 Sigmas : 0.043 0.043 0.000 0.000  
 Shft/esd: 0.00

FE9 moved 0.00A sum(shift/e.s.d)\*\*2 : 0.02

1SF0  
 Page 54

GENLES Version Win32 Jun 24 14:07:37 2011

FE+3 ( 10) Values : 0.540 0.000000 0.000000 0.547679 0.359  
 Sigmas : 0.000050 0.032  
 Shft/esd: -0.03 -0.15

FE+3 ( 10) Moments : 2.670 0.000 0.000 2.670 90.000 0.000  
 Sigmas : 0.043 0.043 0.000 0.000  
 Shft/esd: 0.00

FE10 moved 0.00A sum(shift/e.s.d)\*\*2 : 0.02

FE+3 ( 11) Values : 0.540 0.666670 0.333330 0.881009 0.359  
 Sigmas : 0.000050 0.032  
 Shft/esd: -0.03 -0.15

FE+3 ( 11) Moments : 2.670 0.000 0.000 2.670 90.000 0.000  
 Sigmas : 0.043 0.043 0.000 0.000  
 Shft/esd: 0.00

FE11 moved 0.00A sum(shift/e.s.d)\*\*2 : 0.02

FE+3 ( 12) Values : 0.540 0.333330 0.666670 0.214349 0.359  
 Sigmas : 0.000050 0.032  
 Shft/esd: -0.03 -0.15

FE+3 ( 12) Moments : 2.670 0.000 0.000 2.670 90.000 0.000  
 Sigmas : 0.043 0.043 0.000 0.000  
 Shft/esd: 0.00

FE12 moved 0.00A sum(shift/e.s.d)\*\*2 : 0.02

Maximum atom shift: 0.00  
 Atomic parameter sum(shift/error)\*\*2 for phase 2 : 0.29  
 Calculated unit cell formula weight: 335.082, density: 1.694gm/cm\*\*3

Histogram scale factors:

| Histogram:                                   | 1 PNT        | 2 PNT        | 3 PNT        | 4 PNT*  | 5 PXC*  |
|----------------------------------------------|--------------|--------------|--------------|---------|---------|
| Scale :                                      | 8.77263      | 8.78017      | 10.0722      | 0.00000 | 0.00000 |
| Sigmas :                                     | 0.331840E-01 | 0.300370E-01 | 0.362686E-01 | 0.00000 | 0.00000 |
| Shift/esd:                                   | 0.02         | 0.02         | 0.01         | 0.00    | 0.00    |
| Histogram scale factor sum(shift/error)**2 : | 0.00         |              |              |         |         |

Lattice parameters for powder data:

| Phase 1  | a        | b        | c         | alpha  | beta   | gamma   | volume  |
|----------|----------|----------|-----------|--------|--------|---------|---------|
| Value :  | 5.202475 | 5.202475 | 14.014489 | 90.000 | 90.000 | 120.000 | 328.494 |
| Sigmas : | 0.000004 | 0.000004 | 0.000114  | 0.000  | 0.000  | 0.000   | 0.003   |

Reciprocal metric tensor shift factor = 100%



Profile coefficients for histogram no. 1 and for phase no. 2:  
Coeff. : alp be-0 be-1 sg-0 sg-1 sg-2 ga-0 ga-1 ga-2  
gsf  
Value : 2.898E-01 5.288E-02 7.468E-03 0.000E+00 2.460E+01 2.080E+00 0.000E+00 3.151E+00 0.000E+00  
0.000E+00  
Sigmas : 8.514E-01 1.560E-01  
Shift/esd: 0.00 0.00  
Coeff. : g1ec g2ec rstr rsta rsc L11 L22 L33 L12  
L13  
Value : 0.000E+00 0.000E+00 0.000E+00 0.000E+00 0.000E+00 0.000E+00 0.000E+00 0.000E+00 0.000E+00  
0.000E+00  
Sigmas :  
Shift/esd:  
Coeff. : L23  
Value : 0.000E+00  
Sigmas :  
Shift/esd:

Profile coefficients for histogram no. 2 and for phase no. 2:  
Coeff. : alp be-0 be-1 sg-0 sg-1 sg-2 ga-0 ga-1 ga-2  
gsf  
Value : 4.108E+00 6.789E-02 2.857E-03 3.543E+00 4.379E+01 -1.859E+00 0.000E+00 4.546E-02 1.628E+00  
0.000E+00  
Sigmas : 7.582E-01 1.182E-01  
Shift/esd: 0.00 0.00  
Coeff. : g1ec g2ec rstr rsta rsc L11 L22 L33 L12  
L13  
Value : 0.000E+00 0.000E+00 0.000E+00 0.000E+00 0.000E+00 0.000E+00 0.000E+00 0.000E+00 0.000E+00  
0.000E+00  
Sigmas :  
Shift/esd:  
Coeff. : L23  
Value : 0.000E+00  
Sigmas :  
Shift/esd:

Profile coefficients for histogram no. 3 and for phase no. 2:  
Coeff. : alp be-0 be-1 sg-0 sg-1 sg-2 ga-0 ga-1 ga-2  
gsf  
Value : 1.000E+00 5.279E-02 2.026E-01 2.192E+01 7.865E+01 1.284E+00 0.000E+00 0.000E+00 0.000E+00  
0.000E+00  
Sigmas : 8.469E-01  
Shift/esd: 0.00  
Coeff. : g1ec g2ec rstr rsta rsc L11 L22 L33 L12  
L13  
Value : 0.000E+00 0.000E+00 0.000E+00 0.000E+00 0.000E+00 0.000E+00 0.000E+00 0.000E+00 0.000E+00  
0.000E+00  
Sigmas :  
Shift/esd:  
Coeff. : L23  
Value : 0.000E+00  
Sigmas :  
Shift/esd:  
Profile coef. sum(shift/error)\*\*2 : 0.00

Background coefficients for histogram no. 1:  
Param. : 1 2 3 4 5 6  
Coeff. : 3.304043E-01 -1.781903E-02 5.274485E-02 -1.854025E-02 -9.852714E-03 -3.959006E-02  
Sigmas : 4.614010E-03 8.661788E-03 7.903948E-03 7.311772E-03 6.852489E-03 6.160582E-03  
Shift/esd: 0.00 0.00 0.00 0.00 0.00 0.00  
Param. : 7 8 9  
Coeff. : -1.855682E-02 -1.532663E-02 -7.145601E-03  
Sigmas : 5.221907E-03 3.640604E-03 1.897053E-03  
Shift/esd: 0.00 0.00 0.00

Background coefficients for histogram no. 2:  
Param. : 1 2 3 4 5 6  
Coeff. : 2.736550E-01 -9.805607E-02 9.474765E-03 -1.770668E-02 1.123327E-02 -8.159537E-03  
Sigmas : 2.500132E-03 4.625358E-03 4.215625E-03 3.985908E-03 3.837671E-03 3.726899E-03

Shift/esd: 0.00 0.00 0.00 0.00 0.00 0.00 0.00  
 Param. : 7 8 9 10 11 12  
 Coeff. : 1.342611E-04 -1.501863E-02 -7.044830E-03 1.807270E-03 3.521173E-03 -1.697878E-02  
 Sigmas : 3.603158E-03 3.500127E-03 3.258467E-03 2.870652E-03 2.146261E-03 1.151844E-03  
 Shift/esd: 0.00 0.00 0.00 0.00 0.00 0.00 -0.01  
 Background coef. sum(shift/error)\*\*2 : 0.00

CPU times for matrix build 1.59 sec; matrix inversion 0.00 sec  
 Final variable sum((shift/esd)\*\*2) for cycle1163: 0.05 Time: 1.59 sec  
 1SF0 GENLES Version Win32 Jun 24 14:07:37 2011  
 Page 58

Restraint data statistics:  
 No restraints used

| Powder data statistics |      |       | Fitted      |        | -Bknd  |        | pFree  |        | Average |        |     |          |       |
|------------------------|------|-------|-------------|--------|--------|--------|--------|--------|---------|--------|-----|----------|-------|
|                        | Bank | Ndata | Sum(w*d**2) | wRp    | Rp     | wRp    | Rp     | wRp    | Rp      | Npfree | DWd | Integral |       |
| Hstgm 1                | PNT  | 1     | 4524        | 4592.5 | 0.0694 | 0.1159 | 3.0073 | 0.6137 | 0.0000  | 0.0000 | 0   | 0.658    | 0.982 |
| Hstgm 2                | PNT  | 2     | 3753        | 4940.8 | 0.0449 | 0.0945 | 0.1091 | 0.1135 | 0.0000  | 0.0000 | 0   | 0.462    | 0.990 |
| Hstgm 3                | PNT  | 3     | 4808        | 4303.0 | 0.1278 | 0.1742 | 3.2083 | 0.7146 | 0.0000  | 0.0000 | 0   | 0.732    | 0.997 |
| Powder totals          |      | 13085 | 13836.      |        | 0.0614 | 0.1237 | 1.9002 | 0.4462 | 0.0000  | 0.0000 | 0   | 0.611    |       |

No serial correlation in fit at 90% confidence for 1.952 < DWd < 2.048  
 Cycle1164 There were 13085 observations.  
 Total before-cycle CHI\*\*2 (offset/sig) = 1.3836E+04 ( 4.9186E+00)  
 Reduced CHI\*\*2 = 1.061 for 43 variables

Reflection data statistics  
 Histogram 1 Type PNT Nobs = 1302 R(F\*\*2) = 0.1148  
 Histogram 2 Type PNT Nobs = 1071 R(F\*\*2) = 0.0982  
 Histogram 3 Type PNT Nobs = 857 R(F\*\*2) = 0.0805  
 After matrix normalization and Marquardt modification:

1 Columns of the 43 Column matrix are 0.0  
 Full matrix recip. condition value & -log10 = 0.2035E-03 3.69  
 Variable NoVarabl was not refined

The value of the determinant is 1.2970\*10.0\*\*( -22)

Atom parameters for phase no. 1

|           | frac        | x       | y                     | z         | 100*Uiso | 100*U11 | 100*U22 | 100*U33 | 100*U12 | 100*U13 |  |
|-----------|-------------|---------|-----------------------|-----------|----------|---------|---------|---------|---------|---------|--|
| 100*U23   |             |         |                       |           |          |         |         |         |         |         |  |
| SC+3 ( 1) | Values      | : 0.460 | 0.000000              | 0.000000  | 0.047680 | 0.363   |         |         |         |         |  |
|           | Sigmas      | :       |                       |           | 0.000050 | 0.032   |         |         |         |         |  |
|           | Shft/esd:   |         |                       |           | 0.03     | 0.11    |         |         |         |         |  |
| Sc1       | moved 0.00A |         | sum(shift/e.s.d)**2 : | 0.01      |          |         |         |         |         |         |  |
| FE+3 ( 2) | Values      | : 0.460 | 0.000000              | 0.000000  | 0.257903 | 0.531   |         |         |         |         |  |
|           | Sigmas      | :       |                       |           | 0.000050 | 0.035   |         |         |         |         |  |
|           | Shft/esd:   |         |                       |           | 0.03     | -0.12   |         |         |         |         |  |
| Fe1       | moved 0.00A |         | sum(shift/e.s.d)**2 : | 0.01      |          |         |         |         |         |         |  |
| 0 ( 3)    | Values      | : 1.000 | 0.342325              | -0.026073 | 0.817574 | 0.486   |         |         |         |         |  |
|           | Sigmas      | :       | 0.000389              | 0.000228  | 0.000227 | 0.010   |         |         |         |         |  |
|           | Shft/esd:   |         | 0.00                  | 0.00      | -0.03    | -0.02   |         |         |         |         |  |
| 01        | moved 0.00A |         | sum(shift/e.s.d)**2 : | 0.00      |          |         |         |         |         |         |  |
| FE+3 ( 4) | Values      | : 0.540 | 0.000000              | 0.000000  | 0.047680 | 0.363   |         |         |         |         |  |
|           | Sigmas      | :       |                       |           | 0.000050 | 0.032   |         |         |         |         |  |
|           | Shft/esd:   |         |                       |           | 0.03     | 0.11    |         |         |         |         |  |
| Fe2       | moved 0.00A |         | sum(shift/e.s.d)**2 : | 0.01      |          |         |         |         |         |         |  |

1SF0 GENLES Version Win32 Jun 24 14:07:38 2011  
 Page 59

|           |             |         |                       |          |          |       |  |  |  |  |
|-----------|-------------|---------|-----------------------|----------|----------|-------|--|--|--|--|
| SC+3 ( 5) | Values      | : 0.540 | 0.000000              | 0.000000 | 0.257903 | 0.531 |  |  |  |  |
|           | Sigmas      | :       |                       |          | 0.000050 | 0.035 |  |  |  |  |
|           | Shft/esd:   |         |                       |          | 0.03     | -0.12 |  |  |  |  |
| Sc2       | moved 0.00A |         | sum(shift/e.s.d)**2 : | 0.01     |          |       |  |  |  |  |

Maximum atom shift: 0.00  
 Atomic parameter sum(shift/error)\*\*2 for phase 1 : 0.06  
 Calculated unit cell formula weight: 892.800, density: 4.513gm/cm\*\*3

Atom parameters for phase no. 2



FE8 moved 0.00A sum(shift/e.s.d)\*\*2 : 0.01

FE+3 ( 9) Values : 0.540 0.333330 0.666670 0.714351 0.363  
 Sigmas : 0.000050 0.032  
 Shft/esd: 0.03 0.11

FE+3 ( 9) Moments : -2.670 0.000 0.000 2.670 90.000 180.000  
 Sigmas : 0.043 0.043 0.000 0.000  
 Shft/esd: 0.00

FE9 moved 0.00A sum(shift/e.s.d)\*\*2 : 0.01

1SF0  
 Page 61

GENLES Version Win32 Jun 24 14:07:38 2011

FE+3 ( 10) Values : 0.540 0.000000 0.000000 0.547681 0.363  
 Sigmas : 0.000050 0.032  
 Shft/esd: 0.03 0.11

FE+3 ( 10) Moments : 2.670 0.000 0.000 2.670 90.000 0.000  
 Sigmas : 0.043 0.043 0.000 0.000  
 Shft/esd: 0.00

FE10 moved 0.00A sum(shift/e.s.d)\*\*2 : 0.01

FE+3 ( 11) Values : 0.540 0.666670 0.333330 0.881011 0.363  
 Sigmas : 0.000050 0.032  
 Shft/esd: 0.03 0.11

FE+3 ( 11) Moments : 2.670 0.000 0.000 2.670 90.000 0.000  
 Sigmas : 0.043 0.043 0.000 0.000  
 Shft/esd: 0.00

FE11 moved 0.00A sum(shift/e.s.d)\*\*2 : 0.01

FE+3 ( 12) Values : 0.540 0.333330 0.666670 0.214351 0.363  
 Sigmas : 0.000050 0.032  
 Shft/esd: 0.03 0.11

FE+3 ( 12) Moments : 2.670 0.000 0.000 2.670 90.000 0.000  
 Sigmas : 0.043 0.043 0.000 0.000  
 Shft/esd: 0.00

FE12 moved 0.00A sum(shift/e.s.d)\*\*2 : 0.01

Maximum atom shift: 0.00  
 Atomic parameter sum(shift/error)\*\*2 for phase 2 : 0.16  
 Calculated unit cell formula weight: 335.082, density: 1.694gm/cm\*\*3

Histogram scale factors:

| Histogram:                                   | 1 PNT        | 2 PNT        | 3 PNT        | 4 PNT*  | 5 PXC*  |
|----------------------------------------------|--------------|--------------|--------------|---------|---------|
| Scale :                                      | 8.77223      | 8.77968      | 10.0718      | 0.00000 | 0.00000 |
| Sigmas :                                     | 0.332055E-01 | 0.300699E-01 | 0.362803E-01 | 0.00000 | 0.00000 |
| Shift/esd:                                   | -0.01        | -0.02        | -0.01        | 0.00    | 0.00    |
| Histogram scale factor sum(shift/error)**2 : | 0.00         |              |              |         |         |

Lattice parameters for powder data:

| Phase                                        | a                                                   | b        | c         | alpha  | beta   | gamma   | volume  |
|----------------------------------------------|-----------------------------------------------------|----------|-----------|--------|--------|---------|---------|
| Phase 1                                      | 5.202475                                            | 5.202475 | 14.014489 | 90.000 | 90.000 | 120.000 | 328.494 |
|                                              | Sigmas : 0.000004                                   | 0.000004 | 0.000114  | 0.000  | 0.000  | 0.000   | 0.003   |
| Reciprocal metric tensor shift factor = 100% |                                                     |          |           |        |        |         |         |
| Phase 2                                      | 5.202432                                            | 5.202446 | 14.014500 | 90.000 | 90.000 | 119.999 | 328.494 |
|                                              | Sigmas : 0.000007                                   | 0.000007 | 0.000114  | 0.000  | 0.000  | 0.000   | 0.003   |
| Reciprocal metric tensor shift factor = 100% |                                                     |          |           |        |        |         |         |
|                                              | Reciprocal metric tensor sum(shift/error)**2 : 0.00 |          |           |        |        |         |         |

1SF0  
 Page 62

GENLES Version Win32 Jun 24 14:07:39 2011

Diffraction coefficients for powder data:

| Histogram : | 1 PNT        | 2 PNT    | 3 PNT        | 4 PNT*  | 5 PXC*  |
|-------------|--------------|----------|--------------|---------|---------|
| C/L1/R/2Th: | 4569.20      | 6162.13  | 2139.59      | 0.00000 | 0.00000 |
| Sigmas :    | 0.105500     | 0.000000 | 0.153604     | 0.00000 | 0.00000 |
| Shift/esd : | 0.00         | 0.00     | 0.00         | 0.00    | 0.00    |
| Dif A/Pol:  | -0.970092    | -2.51000 | 1.29553      | 0.00000 | 0.00000 |
| Sigmas :    | 0.627747E-01 | 0.000000 | 0.698621E-01 | 0.00000 | 0.00000 |

Shift/esd : 0.00 0.00 0.00 0.00 0.00 0.00  
 Zero : 1.90000 3.85000 9.03000 0.00000 0.00000 0.00000  
 Sigmas : 0.00000 0.00000 0.00000 0.00000 0.00000 0.00000  
 Shift/esd : 0.00 0.00 0.00 0.00 0.00 0.00  
 Dif. Cons. Sum(shift/error)\*\*2 : 0.00

Profile coefficients for histogram no. 1 and for phase no. 1:  
 Coeff. : alp be-0 be-1 sg-0 sg-1 sg-2 ga-0 ga-1 ga-2  
 gsfc  
 Value : 2.898E-01 5.288E-02 7.468E-03 0.000E+00 2.460E+01 2.080E+00 0.000E+00 3.151E+00 0.000E+00  
 0.000E+00  
 Sigmas : 8.514E-01 1.560E-01  
 Shift/esd: 0.00 0.00  
 Coeff. : g1ec g2ec rstr rsta rsca L11 L22 L33 L12  
 L13  
 Value : 0.000E+00 0.000E+00 0.000E+00 0.000E+00 0.000E+00 0.000E+00 0.000E+00 0.000E+00 0.000E+00  
 0.000E+00  
 Sigmas :  
 Shift/esd:  
 Coeff. : L23  
 Value : 0.000E+00  
 Sigmas :  
 Shift/esd:

Profile coefficients for histogram no. 2 and for phase no. 1:  
 Coeff. : alp be-0 be-1 sg-0 sg-1 sg-2 ga-0 ga-1 ga-2  
 gsfc  
 Value : 4.108E+00 6.789E-02 2.857E-03 3.543E+00 4.379E+01 -1.859E+00 0.000E+00 4.550E-02 1.628E+00  
 0.000E+00  
 Sigmas : 7.582E-01 1.182E-01  
 Shift/esd: 0.00 0.00  
 Coeff. : g1ec g2ec rstr rsta rsca L11 L22 L33 L12  
 L13  
 Value : 0.000E+00 0.000E+00 0.000E+00 0.000E+00 0.000E+00 0.000E+00 0.000E+00 0.000E+00 0.000E+00  
 0.000E+00  
 Sigmas :  
 Shift/esd:  
 Coeff. : L23  
 Value : 0.000E+00  
 Sigmas :  
 Shift/esd:

Profile coefficients for histogram no. 3 and for phase no. 1:  
 Coeff. : alp be-0 be-1 sg-0 sg-1 sg-2 ga-0 ga-1 ga-2  
 gsfc  
 Value : 1.000E+00 5.279E-02 2.026E-01 2.192E+01 7.865E+01 1.284E+00 0.000E+00 0.000E+00 0.000E+00  
 0.000E+00  
 Sigmas : 8.469E-01  
 Shift/esd: 0.00  
 Coeff. : g1ec g2ec rstr rsta rsca L11 L22 L33 L12  
 L13  
 Value : 0.000E+00 0.000E+00 0.000E+00 0.000E+00 0.000E+00 0.000E+00 0.000E+00 0.000E+00 0.000E+00  
 0.000E+00  
 Sigmas :  
 Shift/esd:  
 Coeff. : L23  
 Value : 0.000E+00  
 Sigmas :  
 Shift/esd:

Profile coefficients for histogram no. 1 and for phase no. 2:  
 Coeff. : alp be-0 be-1 sg-0 sg-1 sg-2 ga-0 ga-1 ga-2  
 gsfc  
 Value : 2.898E-01 5.288E-02 7.468E-03 0.000E+00 2.460E+01 2.080E+00 0.000E+00 3.151E+00 0.000E+00  
 0.000E+00  
 Sigmas : 8.514E-01 1.560E-01  
 Shift/esd: 0.00 0.00  
 Coeff. : g1ec g2ec rstr rsta rsca L11 L22 L33 L12  
 L13  
 Value : 0.000E+00 0.000E+00 0.000E+00 0.000E+00 0.000E+00 0.000E+00 0.000E+00 0.000E+00 0.000E+00  
 0.000E+00  
 Sigmas :  
 Shift/esd:



Coeff. : L23  
Value : 0.000E+00  
Sigmas :  
Shift/esd:

Profile coefficients for histogram no. 2 and for phase no. 2:

| Coeff.     | alp       | be-0      | be-1      | sg-0      | sg-1      | sg-2       | ga-0      | ga-1      | ga-2      |
|------------|-----------|-----------|-----------|-----------|-----------|------------|-----------|-----------|-----------|
| gsf        |           |           |           |           |           |            |           |           |           |
| Value      | 4.108E+00 | 6.789E-02 | 2.857E-03 | 3.543E+00 | 4.379E+01 | -1.859E+00 | 0.000E+00 | 4.550E-02 | 1.628E+00 |
| 0.000E+00  |           |           |           |           |           |            |           |           |           |
| Sigmas     |           |           |           |           | 7.582E-01 |            |           | 1.182E-01 |           |
| Shift/esd: |           |           |           |           | 0.00      |            |           | 0.00      |           |
| Coeff.     | g1ec      | g2ec      | rstr      | rsta      | rscs      | L11        | L22       | L33       | L12       |
| L13        |           |           |           |           |           |            |           |           |           |
| Value      | 0.000E+00 | 0.000E+00 | 0.000E+00 | 0.000E+00 | 0.000E+00 | 0.000E+00  | 0.000E+00 | 0.000E+00 | 0.000E+00 |
| 0.000E+00  |           |           |           |           |           |            |           |           |           |
| Sigmas     |           |           |           |           |           |            |           |           |           |
| Shift/esd: |           |           |           |           |           |            |           |           |           |
| Coeff.     | L23       |           |           |           |           |            |           |           |           |
| Value      | 0.000E+00 |           |           |           |           |            |           |           |           |
| Sigmas     |           |           |           |           |           |            |           |           |           |
| Shift/esd: |           |           |           |           |           |            |           |           |           |

Profile coefficients for histogram no. 3 and for phase no. 2:

| Coeff.     | alp       | be-0      | be-1      | sg-0      | sg-1      | sg-2      | ga-0      | ga-1      | ga-2      |
|------------|-----------|-----------|-----------|-----------|-----------|-----------|-----------|-----------|-----------|
| gsf        |           |           |           |           |           |           |           |           |           |
| Value      | 1.000E+00 | 5.279E-02 | 2.026E-01 | 2.192E+01 | 7.865E+01 | 1.284E+00 | 0.000E+00 | 0.000E+00 | 0.000E+00 |
| 0.000E+00  |           |           |           |           |           |           |           |           |           |
| Sigmas     |           |           |           |           | 8.469E-01 |           |           |           |           |
| Shift/esd: |           |           |           |           | 0.00      |           |           |           |           |
| Coeff.     | g1ec      | g2ec      | rstr      | rsta      | rscs      | L11       | L22       | L33       | L12       |
| L13        |           |           |           |           |           |           |           |           |           |
| Value      | 0.000E+00 |
| 0.000E+00  |           |           |           |           |           |           |           |           |           |
| Sigmas     |           |           |           |           |           |           |           |           |           |
| Shift/esd: |           |           |           |           |           |           |           |           |           |
| Coeff.     | L23       |           |           |           |           |           |           |           |           |
| Value      | 0.000E+00 |           |           |           |           |           |           |           |           |
| Sigmas     |           |           |           |           |           |           |           |           |           |
| Shift/esd: |           |           |           |           |           |           |           |           |           |

Profile coef. sum(shift/error)\*\*2 : 0.00

Background coefficients for histogram no. 1:

| Param.     | 1             | 2             | 3             | 4             | 5             | 6             |
|------------|---------------|---------------|---------------|---------------|---------------|---------------|
| Coeff.     | 3.304095E-01  | -1.782464E-02 | 5.275792E-02  | -1.854620E-02 | -9.840911E-03 | -3.959202E-02 |
| Sigmas     | 4.613965E-03  | 8.661647E-03  | 7.903880E-03  | 7.311704E-03  | 6.852506E-03  | 6.160570E-03  |
| Shift/esd: | 0.00          | 0.00          | 0.00          | 0.00          | 0.00          | 0.00          |
| Param.     | 7             | 8             | 9             |               |               |               |
| Coeff.     | -1.854514E-02 | -1.532443E-02 | -7.141201E-03 |               |               |               |
| Sigmas     | 5.221954E-03  | 3.640598E-03  | 1.897082E-03  |               |               |               |
| Shift/esd: | 0.00          | 0.00          | 0.00          |               |               |               |

1SF0

GENLES Version Win32 Jun 24 14:07:39 2011

Page 64

Background coefficients for histogram no. 2:

| Param.     | 1            | 2             | 3             | 4             | 5            | 6             |
|------------|--------------|---------------|---------------|---------------|--------------|---------------|
| Coeff.     | 2.736583E-01 | -9.805709E-02 | 9.483268E-03  | -1.770733E-02 | 1.123947E-02 | -8.159399E-03 |
| Sigmas     | 2.500233E-03 | 4.625442E-03  | 4.215748E-03  | 3.985926E-03  | 3.837702E-03 | 3.726864E-03  |
| Shift/esd: | 0.00         | 0.00          | 0.00          | 0.00          | 0.00         | 0.00          |
| Param.     | 7            | 8             | 9             | 10            | 11           | 12            |
| Coeff.     | 1.389942E-04 | -1.501151E-02 | -7.037697E-03 | 1.814924E-03  | 3.528515E-03 | -1.697022E-02 |
| Sigmas     | 3.603153E-03 | 3.500113E-03  | 3.258482E-03  | 2.870671E-03  | 2.146293E-03 | 1.151913E-03  |
| Shift/esd: | 0.00         | 0.00          | 0.00          | 0.00          | 0.00         | 0.01          |

Background coef. sum(shift/error)\*\*2 : 0.00

CPU times for matrix build 1.59 sec; matrix inversion 0.02 sec

Final variable sum((shift/esd)\*\*2) for cycle1164: 0.03 Time: 1.61 sec

1SF0

GENLES Version Win32 Jun 24 14:07:39 2011

Page 65

Restraint data statistics:

No restraints used

Powder data statistics

Fitted

-Bknd

pFree

Average

|        | Bank   | Ndata | Sum(w*d**2) | wRp    | Rp     | wRp    | Rp     | wRp    | Rp     | Npfree | DWd | Integral |       |
|--------|--------|-------|-------------|--------|--------|--------|--------|--------|--------|--------|-----|----------|-------|
| Hstgm  | 1      | PNT   | 1 4524      | 4592.6 | 0.0694 | 0.1159 | 3.0074 | 0.6137 | 0.0000 | 0.0000 | 0   | 0.658    | 0.982 |
| Hstgm  | 2      | PNT   | 2 3753      | 4940.9 | 0.0449 | 0.0945 | 0.1091 | 0.1135 | 0.0000 | 0.0000 | 0   | 0.462    | 0.990 |
| Hstgm  | 3      | PNT   | 3 4808      | 4302.9 | 0.1278 | 0.1742 | 3.2083 | 0.7146 | 0.0000 | 0.0000 | 0   | 0.732    | 0.997 |
| Powder | totals |       | 13085       | 13836. | 0.0614 | 0.1237 | 1.9003 | 0.4462 | 0.0000 | 0.0000 | 0   | 0.611    |       |

No serial correlation in fit at 90% confidence for  $1.952 < DWd < 2.048$   
 Cycle1165 There were 13085 observations.  
 Total before-cycle CHI\*\*2 (offset/sig) =  $1.3836E+04$  (  $4.9185E+00$ )  
 Reduced CHI\*\*2 = 1.061 for 43 variables

Reflection data statistics

Histogram 1 Type PNT Nobs = 1302 R(F\*\*2) = 0.1148  
 Histogram 2 Type PNT Nobs = 1071 R(F\*\*2) = 0.0982  
 Histogram 3 Type PNT Nobs = 857 R(F\*\*2) = 0.0805  
 After matrix normalization and Marquardt modification:

1 Columns of the 43 Column matrix are 0.0  
 Full matrix recip. condition value & -log10 =  $0.2036E-03$  3.69  
 Variable NoVarabl was not refined

The value of the determinant is  $1.2863*10.0**( -22)$

Atom parameters for phase no. 1

|                    | frac  | x                     | y         | z        | 100*Uiso | 100*U11 | 100*U22 | 100*U33 | 100*U12 | 100*U13 |
|--------------------|-------|-----------------------|-----------|----------|----------|---------|---------|---------|---------|---------|
| 100*U23            |       |                       |           |          |          |         |         |         |         |         |
| SC+3 ( 1) Values : | 0.460 | 0.000000              | 0.000000  | 0.047679 | 0.360    |         |         |         |         |         |
| Sigmas :           |       |                       |           | 0.000050 | 0.032    |         |         |         |         |         |
| Shft/esd:          |       |                       |           | -0.02    | -0.08    |         |         |         |         |         |
| Sc1 moved 0.00A    |       | sum(shift/e.s.d)**2 : |           | 0.01     |          |         |         |         |         |         |
| FE+3 ( 2) Values : | 0.460 | 0.000000              | 0.000000  | 0.257903 | 0.534    |         |         |         |         |         |
| Sigmas :           |       |                       |           |          | 0.036    |         |         |         |         |         |
| Shft/esd:          |       |                       |           |          | 0.08     |         |         |         |         |         |
| Fe1 moved 0.00A    |       | sum(shift/e.s.d)**2 : |           | 0.01     |          |         |         |         |         |         |
| 0 ( 3) Values :    | 1.000 | 0.342324              | -0.026074 | 0.817579 | 0.486    |         |         |         |         |         |
| Sigmas :           |       | 0.000389              | 0.000227  | 0.000226 | 0.010    |         |         |         |         |         |
| Shft/esd:          |       | 0.00                  | 0.00      | 0.02     | 0.01     |         |         |         |         |         |
| 01 moved 0.00A     |       | sum(shift/e.s.d)**2 : |           | 0.00     |          |         |         |         |         |         |
| FE+3 ( 4) Values : | 0.540 | 0.000000              | 0.000000  | 0.047679 | 0.360    |         |         |         |         |         |
| Sigmas :           |       |                       |           | 0.000050 | 0.032    |         |         |         |         |         |
| Shft/esd:          |       |                       |           | -0.02    | -0.08    |         |         |         |         |         |
| Fe2 moved 0.00A    |       | sum(shift/e.s.d)**2 : |           | 0.01     |          |         |         |         |         |         |

1SF0

GENLES Version Win32 Jun 24 14:07:40 2011

Page 66

|                    |       |                       |          |          |       |  |  |  |  |  |
|--------------------|-------|-----------------------|----------|----------|-------|--|--|--|--|--|
| SC+3 ( 5) Values : | 0.540 | 0.000000              | 0.000000 | 0.257903 | 0.534 |  |  |  |  |  |
| Sigmas :           |       |                       |          |          | 0.036 |  |  |  |  |  |
| Shft/esd:          |       |                       |          |          | 0.08  |  |  |  |  |  |
| Sc2 moved 0.00A    |       | sum(shift/e.s.d)**2 : |          | 0.01     |       |  |  |  |  |  |

Maximum atom shift: 0.00

Atomic parameter sum(shift/error)\*\*2 for phase 1 : 0.03

Calculated unit cell formula weight: 892.800, density: 4.513gm/cm\*\*3

Atom parameters for phase no. 2

|                     | frac  | x                     | y        | z        | 100*Uiso | 100*U11 | 100*U22 | 100*U33 | 100*U12 | 100*U13 |
|---------------------|-------|-----------------------|----------|----------|----------|---------|---------|---------|---------|---------|
| 100*U23             |       |                       |          |          |          |         |         |         |         |         |
| FE+3 ( 1) Values :  | 0.460 | 0.000000              | 0.000000 | 0.257890 | 0.534    |         |         |         |         |         |
| Sigmas :            |       |                       |          |          | 0.036    |         |         |         |         |         |
| Shft/esd:           |       |                       |          |          | 0.08     |         |         |         |         |         |
| FE+3 ( 1) Moments : |       | 2.670                 | 0.000    | 0.000    | 2.670    | 90.000  | 0.000   |         |         |         |
| Sigmas :            |       | 0.043                 |          |          | 0.043    | 0.000   | 0.000   |         |         |         |
| Shft/esd:           |       | 0.00                  |          |          |          |         |         |         |         |         |
| FE1 moved 0.00A     |       | sum(shift/e.s.d)**2 : |          | 0.01     |          |         |         |         |         |         |
| FE+3 ( 2) Values :  | 0.460 | 0.666670              | 0.333330 | 0.591220 | 0.534    |         |         |         |         |         |
| Sigmas :            |       |                       |          |          | 0.036    |         |         |         |         |         |
| Shft/esd:           |       |                       |          |          | 0.08     |         |         |         |         |         |
| FE+3 ( 2) Moments : |       | 2.670                 | 0.000    | 0.000    | 2.670    | 90.000  | 0.000   |         |         |         |

|      |             |                       |                                  |       |        |         |       |
|------|-------------|-----------------------|----------------------------------|-------|--------|---------|-------|
|      |             | Sigmas :              | 0.043                            |       | 0.043  | 0.000   | 0.000 |
|      |             | Shft/esd:             | 0.00                             |       |        |         |       |
| FE2  | moved 0.00A | sum(shift/e.s.d)**2 : | 0.01                             |       |        |         |       |
| FE+3 | ( 3)        | Values :              | 0.460 0.333330 0.666670 0.924560 | 0.534 |        |         |       |
|      |             | Sigmas :              |                                  | 0.036 |        |         |       |
|      |             | Shft/esd:             |                                  | 0.08  |        |         |       |
| FE+3 | ( 3)        | Moments :             | 2.670 0.000 0.000                | 2.670 | 90.000 | 0.000   |       |
|      |             | Sigmas :              | 0.043                            | 0.043 | 0.000  | 0.000   |       |
|      |             | Shft/esd:             | 0.00                             |       |        |         |       |
| FE3  | moved 0.00A | sum(shift/e.s.d)**2 : | 0.01                             |       |        |         |       |
| FE+3 | ( 4)        | Values :              | 0.460 0.000000 0.000000 0.757890 | 0.534 |        |         |       |
|      |             | Sigmas :              |                                  | 0.036 |        |         |       |
|      |             | Shft/esd:             |                                  | 0.08  |        |         |       |
| FE+3 | ( 4)        | Moments :             | -2.670 0.000 0.000               | 2.670 | 90.000 | 180.000 |       |
|      |             | Sigmas :              | 0.043                            | 0.043 | 0.000  | 0.000   |       |
|      |             | Shft/esd:             | 0.00                             |       |        |         |       |
| FE4  | moved 0.00A | sum(shift/e.s.d)**2 : | 0.01                             |       |        |         |       |

1SF0  
Page 67

GENLES Version Win32 Jun 24 14:07:40 2011

|      |             |                       |                                  |          |        |         |  |
|------|-------------|-----------------------|----------------------------------|----------|--------|---------|--|
| FE+3 | ( 5)        | Values :              | 0.460 0.666670 0.333330 0.091220 | 0.534    |        |         |  |
|      |             | Sigmas :              |                                  | 0.036    |        |         |  |
|      |             | Shft/esd:             |                                  | 0.08     |        |         |  |
| FE+3 | ( 5)        | Moments :             | -2.670 0.000 0.000               | 2.670    | 90.000 | 180.000 |  |
|      |             | Sigmas :              | 0.043                            | 0.043    | 0.000  | 0.000   |  |
|      |             | Shft/esd:             | 0.00                             |          |        |         |  |
| FE5  | moved 0.00A | sum(shift/e.s.d)**2 : | 0.01                             |          |        |         |  |
| FE+3 | ( 6)        | Values :              | 0.460 0.333330 0.666670 0.424560 | 0.534    |        |         |  |
|      |             | Sigmas :              |                                  | 0.036    |        |         |  |
|      |             | Shft/esd:             |                                  | 0.08     |        |         |  |
| FE+3 | ( 6)        | Moments :             | -2.670 0.000 0.000               | 2.670    | 90.000 | 180.000 |  |
|      |             | Sigmas :              | 0.043                            | 0.043    | 0.000  | 0.000   |  |
|      |             | Shft/esd:             | 0.00                             |          |        |         |  |
| FE6  | moved 0.00A | sum(shift/e.s.d)**2 : | 0.01                             |          |        |         |  |
| FE+3 | ( 7)        | Values :              | 0.540 0.000000 0.000000 0.047679 | 0.360    |        |         |  |
|      |             | Sigmas :              |                                  | 0.000050 | 0.032  |         |  |
|      |             | Shft/esd:             |                                  | -0.02    | -0.08  |         |  |
| FE+3 | ( 7)        | Moments :             | -2.670 0.000 0.000               | 2.670    | 90.000 | 180.000 |  |
|      |             | Sigmas :              | 0.043                            | 0.043    | 0.000  | 0.000   |  |
|      |             | Shft/esd:             | 0.00                             |          |        |         |  |
| FE7  | moved 0.00A | sum(shift/e.s.d)**2 : | 0.01                             |          |        |         |  |
| FE+3 | ( 8)        | Values :              | 0.540 0.666670 0.333330 0.381009 | 0.360    |        |         |  |
|      |             | Sigmas :              |                                  | 0.000050 | 0.032  |         |  |
|      |             | Shft/esd:             |                                  | -0.02    | -0.08  |         |  |
| FE+3 | ( 8)        | Moments :             | -2.670 0.000 0.000               | 2.670    | 90.000 | 180.000 |  |
|      |             | Sigmas :              | 0.043                            | 0.043    | 0.000  | 0.000   |  |
|      |             | Shft/esd:             | 0.00                             |          |        |         |  |
| FE8  | moved 0.00A | sum(shift/e.s.d)**2 : | 0.01                             |          |        |         |  |
| FE+3 | ( 9)        | Values :              | 0.540 0.333330 0.666670 0.714350 | 0.360    |        |         |  |
|      |             | Sigmas :              |                                  | 0.000050 | 0.032  |         |  |
|      |             | Shft/esd:             |                                  | -0.02    | -0.08  |         |  |
| FE+3 | ( 9)        | Moments :             | -2.670 0.000 0.000               | 2.670    | 90.000 | 180.000 |  |
|      |             | Sigmas :              | 0.043                            | 0.043    | 0.000  | 0.000   |  |
|      |             | Shft/esd:             | 0.00                             |          |        |         |  |
| FE9  | moved 0.00A | sum(shift/e.s.d)**2 : | 0.01                             |          |        |         |  |

1SF0  
Page 68

GENLES Version Win32 Jun 24 14:07:40 2011

|      |       |           |                                  |          |       |  |  |
|------|-------|-----------|----------------------------------|----------|-------|--|--|
| FE+3 | ( 10) | Values :  | 0.540 0.000000 0.000000 0.547680 | 0.360    |       |  |  |
|      |       | Sigmas :  |                                  | 0.000050 | 0.032 |  |  |
|      |       | Shft/esd: |                                  | -0.02    | -0.08 |  |  |





Shift/esd:  
 Coeff. : L23  
 Value : 0.000E+00  
 Sigmas :  
 Shift/esd:

Profile coefficients for histogram no. 3 and for phase no. 2:  
 Coeff. : alp be-0 be-1 sg-0 sg-1 sg-2 ga-0 ga-1 ga-2  
 gsf  
 Value : 1.000E+00 5.279E-02 2.026E-01 2.192E+01 7.865E+01 1.284E+00 0.000E+00 0.000E+00 0.000E+00  
 0.000E+00  
 Sigmas : 8.469E-01  
 Shift/esd: 0.00  
 Coeff. : g1ec g2ec rstr rsta rsca L11 L22 L33 L12  
 L13  
 Value : 0.000E+00 0.000E+00 0.000E+00 0.000E+00 0.000E+00 0.000E+00 0.000E+00 0.000E+00 0.000E+00  
 0.000E+00  
 Sigmas :  
 Shift/esd:  
 Coeff. : L23  
 Value : 0.000E+00  
 Sigmas :  
 Shift/esd:  
 Profile coef. sum(shift/error)\*\*2 : 0.00

Background coefficients for histogram no. 1:  
 Param. : 1 2 3 4 5 6  
 Coeff. : 3.304054E-01 -1.782049E-02 5.274797E-02 -1.854159E-02 -9.849624E-03 -3.959022E-02  
 Sigmas : 4.613941E-03 8.661622E-03 7.903878E-03 7.311721E-03 6.852528E-03 6.160629E-03  
 Shift/esd: 0.00 0.00 0.00 0.00 0.00 0.00  
 Param. : 7 8 9  
 Coeff. : -1.855364E-02 -1.532588E-02 -7.144468E-03  
 Sigmas : 5.221975E-03 3.640631E-03 1.897068E-03  
 Shift/esd: 0.00 0.00 0.00  
 1SF0 GENLES Version Win32 Jun 24 14:07:40 2011  
 Page 71

Background coefficients for histogram no. 2:  
 Param. : 1 2 3 4 5 6  
 Coeff. : 2.736558E-01 -9.805617E-02 9.476895E-03 -1.770665E-02 1.123486E-02 -8.159340E-03  
 Sigmas : 2.500217E-03 4.625475E-03 4.215742E-03 3.985945E-03 3.837685E-03 3.726868E-03  
 Shift/esd: 0.00 0.00 0.00 0.00 0.00 0.00  
 Param. : 7 8 9 10 11 12  
 Coeff. : 1.355629E-04 -1.501663E-02 -7.042864E-03 1.809344E-03 3.523126E-03 -1.697653E-02  
 Sigmas : 3.603138E-03 3.500117E-03 3.258470E-03 2.870659E-03 2.146270E-03 1.151864E-03  
 Shift/esd: 0.00 0.00 0.00 0.00 0.00 0.00  
 Background coef. sum(shift/error)\*\*2 : 0.00

CPU times for matrix build 1.72 sec; matrix inversion 0.02 sec  
 Final variable sum((shift/esd)\*\*2) for cycle1165: 0.02 Time: 1.73 sec  
 1SF0 GENLES Version Win32 Jun 24 14:07:40 2011  
 Page 72

Restraint data statistics:  
 No restraints used

| Powder data statistics |      |       | Fitted      |        | -Bknd  |        | pFree  |        | Average |        |     |          |       |
|------------------------|------|-------|-------------|--------|--------|--------|--------|--------|---------|--------|-----|----------|-------|
|                        | Bank | Ndata | Sum(w*d**2) | wRp    | Rp     | wRp    | Rp     | wRp    | Rp      | Npfree | DWd | Integral |       |
| Hstgm 1                | PNT  | 1     | 4524        | 4592.6 | 0.0694 | 0.1159 | 3.0073 | 0.6137 | 0.0000  | 0.0000 | 0   | 0.658    | 0.982 |
| Hstgm 2                | PNT  | 2     | 3753        | 4940.8 | 0.0449 | 0.0945 | 0.1091 | 0.1135 | 0.0000  | 0.0000 | 0   | 0.462    | 0.990 |
| Hstgm 3                | PNT  | 3     | 4808        | 4303.0 | 0.1278 | 0.1742 | 3.2083 | 0.7146 | 0.0000  | 0.0000 | 0   | 0.732    | 0.997 |
| Powder totals          |      | 13085 | 13836.      |        | 0.0614 | 0.1237 | 1.9002 | 0.4462 | 0.0000  | 0.0000 | 0   | 0.611    |       |

No serial correlation in fit at 90% confidence for 1.952 < DWd < 2.048  
 Cycle1166 There were 13085 observations.  
 Total before-cycle CHI\*\*2 (offset/sig) = 1.3836E+04 ( 4.9187E+00)  
 Reduced CHI\*\*2 = 1.061 for 43 variables

Reflection data statistics  
 Histogram 1 Type PNT Nobs = 1302 R(F\*\*2) = 0.1148  
 Histogram 2 Type PNT Nobs = 1071 R(F\*\*2) = 0.0982  
 Histogram 3 Type PNT Nobs = 857 R(F\*\*2) = 0.0805  
 After matrix normalization and Marquardt modification:

1 Columns of the 43 Column matrix are 0.0  
 Full matrix recip. condition value & -log10 = 0.2035E-03 3.69  
 Variable NoVarabl was not refined

The value of the determinant is 1.2938\*10.0\*\*( -22)

Atom parameters for phase no. 1

|           | frac        | x                     | y        | z         | 100*Uiso | 100*U11 | 100*U22 | 100*U33 | 100*U12 | 100*U13 |
|-----------|-------------|-----------------------|----------|-----------|----------|---------|---------|---------|---------|---------|
| 100*U23   |             |                       |          |           |          |         |         |         |         |         |
| SC+3 ( 1) | Values :    | 0.460                 | 0.000000 | 0.000000  | 0.047679 | 0.362   |         |         |         |         |
|           | Sigmas :    |                       |          |           | 0.000050 | 0.032   |         |         |         |         |
|           | Shft/esd:   |                       |          |           | 0.01     | 0.06    |         |         |         |         |
| Sc1       | moved 0.00A | sum(shift/e.s.d)**2 : |          | 0.00      |          |         |         |         |         |         |
| FE+3 ( 2) | Values :    | 0.460                 | 0.000000 | 0.000000  | 0.257903 | 0.531   |         |         |         |         |
|           | Sigmas :    |                       |          |           |          | 0.036   |         |         |         |         |
|           | Shft/esd:   |                       |          |           |          | -0.06   |         |         |         |         |
| Fe1       | moved 0.00A | sum(shift/e.s.d)**2 : |          | 0.00      |          |         |         |         |         |         |
| 0 ( 3)    | Values :    | 1.000                 | 0.342325 | -0.026073 | 0.817575 | 0.486   |         |         |         |         |
|           | Sigmas :    |                       | 0.000389 | 0.000228  | 0.000227 | 0.010   |         |         |         |         |
|           | Shft/esd:   |                       | 0.00     | 0.00      | -0.02    | -0.01   |         |         |         |         |
| 01        | moved 0.00A | sum(shift/e.s.d)**2 : |          | 0.00      |          |         |         |         |         |         |
| FE+3 ( 4) | Values :    | 0.540                 | 0.000000 | 0.000000  | 0.047679 | 0.362   |         |         |         |         |
|           | Sigmas :    |                       |          |           | 0.000050 | 0.032   |         |         |         |         |
|           | Shft/esd:   |                       |          |           | 0.01     | 0.06    |         |         |         |         |
| Fe2       | moved 0.00A | sum(shift/e.s.d)**2 : |          | 0.00      |          |         |         |         |         |         |

1SF0  
 Page 73

GENLES Version Win32 Jun 24 14:07:42 2011

|           |             |                       |          |          |          |       |  |  |  |  |
|-----------|-------------|-----------------------|----------|----------|----------|-------|--|--|--|--|
| SC+3 ( 5) | Values :    | 0.540                 | 0.000000 | 0.000000 | 0.257903 | 0.531 |  |  |  |  |
|           | Sigmas :    |                       |          |          |          | 0.036 |  |  |  |  |
|           | Shft/esd:   |                       |          |          |          | -0.06 |  |  |  |  |
| Sc2       | moved 0.00A | sum(shift/e.s.d)**2 : |          | 0.00     |          |       |  |  |  |  |

Maximum atom shift: 0.00

Atomic parameter sum(shift/error)\*\*2 for phase 1 : 0.02

Calculated unit cell formula weight: 892.800, density: 4.513gm/cm\*\*3

Atom parameters for phase no. 2

|           | frac        | x                     | y        | z        | 100*Uiso | 100*U11 | 100*U22 | 100*U33 | 100*U12 | 100*U13 |
|-----------|-------------|-----------------------|----------|----------|----------|---------|---------|---------|---------|---------|
| 100*U23   |             |                       |          |          |          |         |         |         |         |         |
| FE+3 ( 1) | Values :    | 0.460                 | 0.000000 | 0.000000 | 0.257890 | 0.531   |         |         |         |         |
|           | Sigmas :    |                       |          |          |          | 0.036   |         |         |         |         |
|           | Shft/esd:   |                       |          |          |          | -0.06   |         |         |         |         |
| FE+3 ( 1) | Moments :   |                       | 2.670    | 0.000    | 0.000    | 2.670   | 90.000  | 0.000   |         |         |
|           | Sigmas :    |                       | 0.043    |          |          | 0.043   | 0.000   | 0.000   |         |         |
|           | Shft/esd:   |                       | 0.00     |          |          |         |         |         |         |         |
| FE1       | moved 0.00A | sum(shift/e.s.d)**2 : |          | 0.00     |          |         |         |         |         |         |
| FE+3 ( 2) | Values :    | 0.460                 | 0.666670 | 0.333330 | 0.591220 | 0.531   |         |         |         |         |
|           | Sigmas :    |                       |          |          |          | 0.036   |         |         |         |         |
|           | Shft/esd:   |                       |          |          |          | -0.06   |         |         |         |         |
| FE+3 ( 2) | Moments :   |                       | 2.670    | 0.000    | 0.000    | 2.670   | 90.000  | 0.000   |         |         |
|           | Sigmas :    |                       | 0.043    |          |          | 0.043   | 0.000   | 0.000   |         |         |
|           | Shft/esd:   |                       | 0.00     |          |          |         |         |         |         |         |
| FE2       | moved 0.00A | sum(shift/e.s.d)**2 : |          | 0.00     |          |         |         |         |         |         |
| FE+3 ( 3) | Values :    | 0.460                 | 0.333330 | 0.666670 | 0.924560 | 0.531   |         |         |         |         |
|           | Sigmas :    |                       |          |          |          | 0.036   |         |         |         |         |
|           | Shft/esd:   |                       |          |          |          | -0.06   |         |         |         |         |
| FE+3 ( 3) | Moments :   |                       | 2.670    | 0.000    | 0.000    | 2.670   | 90.000  | 0.000   |         |         |
|           | Sigmas :    |                       | 0.043    |          |          | 0.043   | 0.000   | 0.000   |         |         |
|           | Shft/esd:   |                       | 0.00     |          |          |         |         |         |         |         |
| FE3       | moved 0.00A | sum(shift/e.s.d)**2 : |          | 0.00     |          |         |         |         |         |         |
| FE+3 ( 4) | Values :    | 0.460                 | 0.000000 | 0.000000 | 0.757890 | 0.531   |         |         |         |         |
|           | Sigmas :    |                       |          |          |          | 0.036   |         |         |         |         |
|           | Shft/esd:   |                       |          |          |          | -0.06   |         |         |         |         |

|      |             |                       |        |       |       |       |        |         |
|------|-------------|-----------------------|--------|-------|-------|-------|--------|---------|
| FE+3 | ( 4)        | Moments :             | -2.670 | 0.000 | 0.000 | 2.670 | 90.000 | 180.000 |
|      |             | Sigmas :              | 0.043  |       |       | 0.043 | 0.000  | 0.000   |
|      |             | Shft/esd:             | 0.00   |       |       |       |        |         |
| FE4  | moved 0.00A | sum(shift/e.s.d)**2 : | 0.00   |       |       |       |        |         |

1SF0  
Page 74

GENLES Version Win32 Jun 24 14:07:42 2011

|      |      |           |       |          |          |          |       |  |
|------|------|-----------|-------|----------|----------|----------|-------|--|
| FE+3 | ( 5) | Values :  | 0.460 | 0.666670 | 0.333330 | 0.091220 | 0.531 |  |
|      |      | Sigmas :  |       |          |          |          | 0.036 |  |
|      |      | Shft/esd: |       |          |          |          | -0.06 |  |

|      |             |                       |        |       |       |       |        |         |
|------|-------------|-----------------------|--------|-------|-------|-------|--------|---------|
| FE+3 | ( 5)        | Moments :             | -2.670 | 0.000 | 0.000 | 2.670 | 90.000 | 180.000 |
|      |             | Sigmas :              | 0.043  |       |       | 0.043 | 0.000  | 0.000   |
|      |             | Shft/esd:             | 0.00   |       |       |       |        |         |
| FE5  | moved 0.00A | sum(shift/e.s.d)**2 : | 0.00   |       |       |       |        |         |

|      |      |           |       |          |          |          |       |  |
|------|------|-----------|-------|----------|----------|----------|-------|--|
| FE+3 | ( 6) | Values :  | 0.460 | 0.333330 | 0.666670 | 0.424560 | 0.531 |  |
|      |      | Sigmas :  |       |          |          |          | 0.036 |  |
|      |      | Shft/esd: |       |          |          |          | -0.06 |  |

|      |             |                       |        |       |       |       |        |         |
|------|-------------|-----------------------|--------|-------|-------|-------|--------|---------|
| FE+3 | ( 6)        | Moments :             | -2.670 | 0.000 | 0.000 | 2.670 | 90.000 | 180.000 |
|      |             | Sigmas :              | 0.043  |       |       | 0.043 | 0.000  | 0.000   |
|      |             | Shft/esd:             | 0.00   |       |       |       |        |         |
| FE6  | moved 0.00A | sum(shift/e.s.d)**2 : | 0.00   |       |       |       |        |         |

|      |      |           |       |          |          |          |       |  |
|------|------|-----------|-------|----------|----------|----------|-------|--|
| FE+3 | ( 7) | Values :  | 0.540 | 0.000000 | 0.000000 | 0.047679 | 0.362 |  |
|      |      | Sigmas :  |       |          |          | 0.000050 | 0.032 |  |
|      |      | Shft/esd: |       |          |          | 0.01     | 0.06  |  |

|      |             |                       |        |       |       |       |        |         |
|------|-------------|-----------------------|--------|-------|-------|-------|--------|---------|
| FE+3 | ( 7)        | Moments :             | -2.670 | 0.000 | 0.000 | 2.670 | 90.000 | 180.000 |
|      |             | Sigmas :              | 0.043  |       |       | 0.043 | 0.000  | 0.000   |
|      |             | Shft/esd:             | 0.00   |       |       |       |        |         |
| FE7  | moved 0.00A | sum(shift/e.s.d)**2 : | 0.00   |       |       |       |        |         |

|      |      |           |       |          |          |          |       |  |
|------|------|-----------|-------|----------|----------|----------|-------|--|
| FE+3 | ( 8) | Values :  | 0.540 | 0.666670 | 0.333330 | 0.381009 | 0.362 |  |
|      |      | Sigmas :  |       |          |          | 0.000050 | 0.032 |  |
|      |      | Shft/esd: |       |          |          | 0.01     | 0.06  |  |

|      |             |                       |        |       |       |       |        |         |
|------|-------------|-----------------------|--------|-------|-------|-------|--------|---------|
| FE+3 | ( 8)        | Moments :             | -2.670 | 0.000 | 0.000 | 2.670 | 90.000 | 180.000 |
|      |             | Sigmas :              | 0.043  |       |       | 0.043 | 0.000  | 0.000   |
|      |             | Shft/esd:             | 0.00   |       |       |       |        |         |
| FE8  | moved 0.00A | sum(shift/e.s.d)**2 : | 0.00   |       |       |       |        |         |

|      |      |           |       |          |          |          |       |  |
|------|------|-----------|-------|----------|----------|----------|-------|--|
| FE+3 | ( 9) | Values :  | 0.540 | 0.333330 | 0.666670 | 0.714350 | 0.362 |  |
|      |      | Sigmas :  |       |          |          | 0.000050 | 0.032 |  |
|      |      | Shft/esd: |       |          |          | 0.01     | 0.06  |  |

|      |             |                       |        |       |       |       |        |         |
|------|-------------|-----------------------|--------|-------|-------|-------|--------|---------|
| FE+3 | ( 9)        | Moments :             | -2.670 | 0.000 | 0.000 | 2.670 | 90.000 | 180.000 |
|      |             | Sigmas :              | 0.043  |       |       | 0.043 | 0.000  | 0.000   |
|      |             | Shft/esd:             | 0.00   |       |       |       |        |         |
| FE9  | moved 0.00A | sum(shift/e.s.d)**2 : | 0.00   |       |       |       |        |         |

1SF0  
Page 75

GENLES Version Win32 Jun 24 14:07:42 2011

|      |       |           |       |          |          |          |       |  |
|------|-------|-----------|-------|----------|----------|----------|-------|--|
| FE+3 | ( 10) | Values :  | 0.540 | 0.000000 | 0.000000 | 0.547680 | 0.362 |  |
|      |       | Sigmas :  |       |          |          | 0.000050 | 0.032 |  |
|      |       | Shft/esd: |       |          |          | 0.01     | 0.06  |  |

|      |             |                       |       |       |       |       |        |       |
|------|-------------|-----------------------|-------|-------|-------|-------|--------|-------|
| FE+3 | ( 10)       | Moments :             | 2.670 | 0.000 | 0.000 | 2.670 | 90.000 | 0.000 |
|      |             | Sigmas :              | 0.043 |       |       | 0.043 | 0.000  | 0.000 |
|      |             | Shft/esd:             | 0.00  |       |       |       |        |       |
| FE10 | moved 0.00A | sum(shift/e.s.d)**2 : | 0.00  |       |       |       |        |       |

|      |       |           |       |          |          |          |       |  |
|------|-------|-----------|-------|----------|----------|----------|-------|--|
| FE+3 | ( 11) | Values :  | 0.540 | 0.666670 | 0.333330 | 0.881010 | 0.362 |  |
|      |       | Sigmas :  |       |          |          | 0.000050 | 0.032 |  |
|      |       | Shft/esd: |       |          |          | 0.01     | 0.06  |  |

|      |             |                       |       |       |       |       |        |       |
|------|-------------|-----------------------|-------|-------|-------|-------|--------|-------|
| FE+3 | ( 11)       | Moments :             | 2.670 | 0.000 | 0.000 | 2.670 | 90.000 | 0.000 |
|      |             | Sigmas :              | 0.043 |       |       | 0.043 | 0.000  | 0.000 |
|      |             | Shft/esd:             | 0.00  |       |       |       |        |       |
| FE11 | moved 0.00A | sum(shift/e.s.d)**2 : | 0.00  |       |       |       |        |       |

|      |       |          |       |          |          |          |       |  |
|------|-------|----------|-------|----------|----------|----------|-------|--|
| FE+3 | ( 12) | Values : | 0.540 | 0.333330 | 0.666670 | 0.214350 | 0.362 |  |
|      |       | Sigmas : |       |          |          | 0.000050 | 0.032 |  |







Sigmas :  
Shift/esd:  
Coeff. : L23  
Value : 0.000E+00  
Sigmas :  
Shift/esd:  
Profile coef. sum(shift/error)\*\*2 : 0.00

Background coefficients for histogram no. 1:  
Param. : 1 2 3 4 5 6  
Coeff. : 3.304084E-01 -1.782352E-02 5.275507E-02 -1.854489E-02 -9.843285E-03 -3.959142E-02  
Sigmas : 4.613899E-03 8.661540E-03 7.903750E-03 7.311590E-03 6.852414E-03 6.160526E-03  
Shift/esd: 0.00 0.00 0.00 0.00 0.00 0.00  
Param. : 7 8 9  
Coeff. : -1.854736E-02 -1.532476E-02 -7.142101E-03  
Sigmas : 5.221928E-03 3.640597E-03 1.897076E-03  
Shift/esd: 0.00 0.00 0.00

1SFO

GENLES Version Win32 Jun 24 14:07:42 2011

Page 78

Background coefficients for histogram no. 2:  
Param. : 1 2 3 4 5 6  
Coeff. : 2.736576E-01 -9.805672E-02 9.481514E-03 -1.770705E-02 1.123820E-02 -8.159352E-03  
Sigmas : 2.500226E-03 4.625457E-03 4.215746E-03 3.985926E-03 3.837695E-03 3.726873E-03  
Shift/esd: 0.00 0.00 0.00 0.00 0.00 0.00  
Param. : 7 8 9 10 11 12  
Coeff. : 1.380600E-04 -1.501287E-02 -7.039095E-03 1.813455E-03 3.527101E-03 -1.697187E-02  
Sigmas : 3.603161E-03 3.500121E-03 3.258479E-03 2.870661E-03 2.146283E-03 1.151899E-03  
Shift/esd: 0.00 0.00 0.00 0.00 0.00 0.00  
Background coef. sum(shift/error)\*\*2 : 0.00

CPU times for matrix build 1.67 sec; matrix inversion 0.02 sec  
Final variable sum((shift/esd)\*\*2) for cycle1166: 0.01 Time: 1.69 sec

Convergence was achieved

1SFO

PUBTABLE Version Win32 Jun 24 14:09:09 2011

Page 1

```
|-----|
|   Program PUBTABLES Version Win32   |
|   Generate crystal structure data tables |
|   Distributed on Wed Jun 01 16:54:19 2011 |
|-----|
```

```
|-----|
|   Allen C. Larson and Robert B. Von Dreele   |
|   Manuel Lujan, Jr. Neutron Scattering Center, MS-H805 |
|   Los Alamos National Laboratory, Los Alamos, NM 87545 |
|   Copyright, 2000, The Regents of the University of California. |
|-----|
```

The last history record is :

HSTRY 90 GENLES Win32 Jun 24 14:07:40 2011 Sdsq= 0.138E+05 S/E= 0.863E-02

-----  
Archiving SAFE\_NEUTRON\_FINAL\_STEPHANSS.EXP as SAFE\_NEUTRON\_FINAL\_STEPHANSS.007  
-----

-----  
Archiving SAFE\_NEUTRON\_FINAL\_STEPHANSS.EXP as SAFE\_NEUTRON\_FINAL\_STEPHANSS.008  
-----
